# Supplementary material
Source: Elsevier journal article supplement (https://www.sciencedirect.com/science/article/pii/S0300289621004087)
Supplement: mmc1 [file S0300289621004087:mmc1.pdf]

## Actualización 2021 de la Guía Española de la EPOC (GESEPOC). Tratamiento farmacológico de la EPOC estable.

### Suplemento 1. Preguntas PICO y evaluación de la evidencia.

#### Pregunta 1.

**Pregunta para responder:**

**Para el tratamiento inicial en un paciente de bajo riesgo no agudizador ¿Es la doble broncodilatación superior a la monoterapia?**

Se identificó una revisión sistemática (RS) reciente que evaluó directamente si la doble broncodilatación es superior a la monoterapia en los pacientes con EPOC. Esta revisión identificó 24 ensayos clínicos aleatorizados (ECAs) en los que se comparó la administración de LABA/LAMA frente a LABA o LAMA.

La mayoría (96%) de los ECAs son multicéntricos y fueron publicados entre 2009 y 2018. En esta RS se incluyeron un total de 45.441 pacientes; el 65% fueron aleatorizados al grupo de intervención y el 35% al grupo control.

Se identificó un estudio adicional tras la publicación de la revisión sistemática, estudio EMAX (Maltais 2019). Este estudio incluyó 2431 pacientes con COPD que no recibían corticoides inhalados a recibir umeclidinium/vilanterol en combinación en comparación a umeclidinium o salmeterol en monoterapia.

**Revisión sistemática:**

1. Mammen MJ, Pai V, Aaron SD, Nici L, Alhazzani W, Alexander PE. Dual LABA/LAMA Therapy versus LABA or LAMA Monotherapy for Chronic Obstructive Pulmonary Disease. A Systematic Review and Meta-analysis in Support of the American Thoracic Society Clinical Practice Guideline. Ann Am Thorac Soc. 2020 Sep;17(9):1133-1143.

**Ensayos clínicos aleatorizados:**

1. Aaron SD, Vandemheen KL, Fergusson D, Maltais F, Bourbeau J, Goldstein R, et al. Tiotropium in combination with placebo, salmeterol, or fluticasone-salmeterol for treatment of chronic obstructive pulmonary disease: a randomized trial. Ann Intern Med. 2007;146(8):545-55.
2. Bateman ED, Ferguson GT, Barnes N, Gallagher N, Green Y, Henley M, et al. Dual bronchodilation with QVA149 versus single bronchodilator therapy: the SHINE study. Eur Respir J. 2013;42(6):1484-94.
3. Buhl R, Maltais F, Abrahams R, Bjermer L, Derom E, Ferguson G, et al. Tiotropium and olodaterol fixed-dose combination versus mono-components in COPD (GOLD 2-4). Eur Respir J. 2015;45(4):969-79.
4. Calverley PMA, Anzueto AR, Carter K, Gronke L, Hallmann C, Jenkins C, et al. Tiotropium and olodaterol in the prevention of chronic obstructive pulmonary disease exacerbations (DYNAGITO): a double-blind, randomised, parallel-group, active-controlled trial. The lancet Respiratory medicine. 2018;6(5):337-44.
5. Celli B, Crater G, Kilbride S, Mehta R, Tabberer M, Kalberg CJ, et al. Once-daily umeclidinium/vilanterol 125/25 mcg in COPD: a randomized, controlled study. Chest. 2014;145(5):981-91.
6. D'Urzo A, Rennard S, Kerwin E, Donohue JF, Lei A, Molins E, et al. A randomised doubleblind, placebo-controlled, long-term extension study of the efficacy, safety and tolerability of fixed-dose combinations of aclidinium/formoterol or monotherapy in the treatment of chronic obstructive pulmonary disease. Respir Med. 2017;125:39-48.
7. Decramer M, Anzueto A, Kerwin E, Kaelin T, Richard N, Crater G, et al. Efficacy and safety of umeclidinium plus vilanterol versus tiotropium, vilanterol, or umeclidinium monotherapies over 24 weeks in patients with chronic obstructive pulmonary disease: results from two multicentre, blinded, randomised controlled trials. The lancet Respiratory medicine. 2014;2(6):472-86.

8. Donohue JF, Maleki-Yazdi M, Kilbride S, Mehta R, Kalberg C, Church A. Efficacy and safety of once-daily umeclidinium/vilanterol 62.5/25 mcg in COPD. *Respiratory medicine*. 2013;107(10):1538-46.
9. Donohue JF, Soong W, Wu X, Shrestha P, Lei A. Long-term safety of aclidinium bromide/formoterol fumarate fixed-dose combination: Results of a randomized 1-year trial in patients with COPD. *Respir Med*. 2016;116:41-8.
10. Ferguson GT, Taylor AF, Thach C, Wang Q, Schubert-Tennigkeit AA, Patalano F, et al. Long-Term Maintenance Bronchodilation With Indacaterol/Glycopyrrolate Versus Indacaterol in Moderate-to-Severe COPD Patients: The FLIGHT 3 Study. *Chronic Obstr Pulm Dis*. 2016;3(4):716-28.
11. Hanania NA, Tashkin DP, Kerwin EM, Donohue JF, Denenberg M, O'Donnell DE, et al. Longterm safety and efficacy of glycopyrrolate/formoterol metered dose inhaler using novel Co-Suspension Delivery Technology in patients with chronic obstructive pulmonary disease. *Respir Med*. 2017;126:105-15.
12. Kerwin EM, Kalberg CJ, Galkin DV, Zhu CQ, Church A, Riley JH, et al. Umeclidinium/vilanterol as step-up therapy from tiotropium in patients with moderate COPD: a randomized, parallel-group, 12-week study. *Int J Chron Obstruct Pulmon Dis*. 2017;12:745-55.
13. Mahler DA, D'Urzo A, Bateman ED, Ozkan SA, White T, Peckitt C, et al. Concurrent use of indacaterol plus tiotropium in patients with COPD provides superior bronchodilation compared with tiotropium alone: a randomised, double-blind comparison. *Thorax*. 2012;67(9):781-8.
14. Mahler DA, Kerwin E, Ayers T, FowlerTaylor A, Maitra S, Thach C, et al. FLIGHT1 and FLIGHT2: Efficacy and Safety of QVA149 (Indacaterol/Glycopyrrolate) versus Its Monocomponents and Placebo in Patients with Chronic Obstructive Pulmonary Disease. *Am J Respir Crit Care Med*. 2015;192(9):1068-79.
15. Maleki-Yazdi MR, Kaelin T, Richard N, Zvarich M, Church A. Efficacy and safety of umeclidinium/vilanterol 62.5/25 mcg and tiotropium 18 mcg in chronic obstructive pulmonary disease: results of a 24-week, randomized, controlled trial. *Respir Med*. 2014;108(12):1752-60.
16. Maltais F, Bjermer L, Kerwin EM, Jones PW, Watkins ML, Tombs L, Naya IP, Boucot IH, Lipson DA, Compton C, Vahdati-Bolouri M, Vogelmeier CF. Efficacy of umeclidinium/vilanterol versus umeclidinium and salmeterol monotherapies in symptomatic patients with COPD not receiving inhaled corticosteroids: the EMAX randomised trial. *Respir Res*. 2019 Oct 30;20(1):238. doi: 10.1186/s12931-019-1193-9. PMID: 31666084; PMCID: PMC6821007.
17. Maltais F, Singh S, Donald AC, Crater G, Church A, Goh AH, et al. Effects of a combination of umeclidinium/vilanterol on exercise endurance in patients with chronic obstructive pulmonary disease: two randomized, double-blind clinical trials. *Ther Adv Respir Dis*. 2014;8(6):169-81.
18. Martinez FJ, Rabe KF, Ferguson GT, Fabbri LM, Rennard S, Feldman GJ, et al. Efficacy and Safety of Glycopyrrolate/Formoterol Metered Dose Inhaler Formulated Using Co-Suspension Delivery Technology in Patients With COPD. *Chest*. 2017;151(2):340-57.
19. Singh D, Ferguson GT, Bolitschek J, Gronke L, Hallmann C, Bennett N, et al. Tiotropium +olodaterol shows clinically meaningful improvements in quality of life. *Respir Med*. 2015;109(10):1312-9.
20. Singh D, Jones PW, Bateman ED, Korn S, Serra C, Molins E, et al. Efficacy and safety of aclidinium bromide/formoterol fumarate fixed-dose combinations compared with individual components and placebo in patients with COPD (ACLIFORM-COPD): a multicentre, randomised study. *BMC Pulm Med*. 2014;14:178.
21. Tashkin DP, Donohue JF, Mahler DA, Huang H, Goodwin E, Schaefer K, et al. Effects of arformoterol twice daily, tiotropium once daily, and their combination in patients with COPD. *Respir Med*. 2009;103(4):516-24.
22. Vincken W, Aumann J, Chen H, Henley M, McBryan D, Goyal P. Efficacy and safety of coadministration of once-daily indacaterol and glycopyrronium versus indacaterol alone in COPD patients: the GLOW6 study. *Int J Chron Obstruct Pulmon Dis*. 2014;9:215-28.
23. Vogelmeier C, Kardos P, Harari S, Gans SJ, Stenglein S, Thirlwell J. Formoterol mono- and combination therapy with tiotropium in patients with COPD: a 6-month study. *Respir Med*. 2008;102(11):1511-20.

|                                                                                                                                                                                                                                                                                                                                                                                                                                                                                                                                                                                                                                                                                                                                                                                                                                                               |                         |
|---------------------------------------------------------------------------------------------------------------------------------------------------------------------------------------------------------------------------------------------------------------------------------------------------------------------------------------------------------------------------------------------------------------------------------------------------------------------------------------------------------------------------------------------------------------------------------------------------------------------------------------------------------------------------------------------------------------------------------------------------------------------------------------------------------------------------------------------------------------|-------------------------|
| <p>24. Wedzicha JA, Decramer M, Ficker JH, Niewoehner DE, Sandstrom T, Taylor AF, et al. Analysis of chronic obstructive pulmonary disease exacerbations with the dual bronchodilator QVA149 compared with glycopyrronium and tiotropium (SPARK): a randomised, doubleblind, parallel-group study. The lancet Respiratory medicine. 2013;1(3):199-209.</p> <p>25. ZuWallack R, Allen L, Hernandez G, Ting N, Abrahams R. Efficacy and safety of combining olodaterol Respimat((R)) and tiotropium HandiHaler((R)) in patients with COPD: results of two randomized, double-blind, active-controlled studies. Int J Chron Obstruct Pulmon Dis. 2014;9:1133-44.</p>                                                                                                                                                                                             |                         |
| <b>Doble broncodilatación (LABA/LAMA) vs monoterapia (LABA o LAMA)</b>                                                                                                                                                                                                                                                                                                                                                                                                                                                                                                                                                                                                                                                                                                                                                                                        |                         |
| <b>Disnea</b>                                                                                                                                                                                                                                                                                                                                                                                                                                                                                                                                                                                                                                                                                                                                                                                                                                                 |                         |
| <p>En el análisis conjunto de los estudios (20.075 pacientes) mostró un incremento significativo en la puntuación de la escala TDI (indicando una disminución de la disnea) favorable a la doble broncodilatación: MD 0.42 puntos más; IC95% 0.31 a 0.52 más (<b>Figura 1</b>). La confianza con los resultados es alta (ver tabla de resumen de resultados).</p> <p>El estudio EMAX, posterior a la publicación de la revisión mostró unos resultados en el mismo sentido, con una reducción significativa de la puntuación subjetiva de disnea (TDI): doble BD frente LAMA: 0,37 puntos IC95% 0,06 a 0,68; doble BD frente LABA: 0,45 puntos IC95% 0,15 a 0,76.</p> <p>Las diferencias clínicamente relevantes se consideran a partir de 1 punto en la escala TDI.</p>                                                                                      | <b>Calidad alta</b>     |
| <b>Hospitalizaciones</b>                                                                                                                                                                                                                                                                                                                                                                                                                                                                                                                                                                                                                                                                                                                                                                                                                                      |                         |
| <p>El análisis conjunto de los estudios (9.719 pacientes) mostró una reducción significativa: RR 0.89 (IC95% 0.82 a 0.97); 19 menos por 1000 (de 32 a 5 menos) (<b>Figura 2</b>). La confianza con los resultados es alta (ver tabla de resumen de resultados).</p>                                                                                                                                                                                                                                                                                                                                                                                                                                                                                                                                                                                           | <b>Calidad alta</b>     |
| <b>Exacerbaciones agudas</b>                                                                                                                                                                                                                                                                                                                                                                                                                                                                                                                                                                                                                                                                                                                                                                                                                                  |                         |
| <p>En el análisis conjunto de los estudios (25.730 pacientes) mostró una reducción significativa: RR 0.80 (IC95% 0.69 a 0.91); 88 menos por 1000 (de 136 a 35 menos) (<b>Figura 3</b>). La confianza con los resultados es moderada (ver tabla de resumen de resultados).</p> <p>El estudio EMAX, posterior a la publicación de la revisión mostró unos resultados en el mismo sentido, con una reducción de las exacerbaciones del 23% (RR 0,77; IC95% 0,62 a 0,95).</p>                                                                                                                                                                                                                                                                                                                                                                                     | <b>Calidad moderada</b> |
| <b>Calidad de vida</b>                                                                                                                                                                                                                                                                                                                                                                                                                                                                                                                                                                                                                                                                                                                                                                                                                                        |                         |
| <p>En el análisis conjunto de los estudios (20.933 pacientes) mostró una reducción significativa en la puntuación de la escala SGRQ (indicando una mejor calidad de vida), favorable a la doble broncodilatación: MD 1.44 puntos menos; IC95% 1.80 a 1.07 menos (<b>Figura 4</b>). La confianza con los resultados es alta (ver tabla de resumen de resultados).</p> <p>El estudio EMAX, posterior a la publicación de la revisión mostró unos resultados en el mismo sentido, con una reducción de la escala de calidad de vida (SGRQ) que fue significativa en la comparación de doble BD frente a LABA (-1,69 puntos IC95% -2,99 a -0,39). No se detectó diferencia en la comparación doble BD frente a LAMA (0,25 puntos IC95% -1,07 a 1,57)</p> <p>Las diferencias clínicamente relevantes se consideran a partir de los 4 puntos en la escala SGRQ.</p> | <b>Calidad alta</b>     |
| <b>Efectos indeseados</b>                                                                                                                                                                                                                                                                                                                                                                                                                                                                                                                                                                                                                                                                                                                                                                                                                                     |                         |

|                                                                                                                                                                                                                                                                                                                                                                                                                                                    |                                |
|----------------------------------------------------------------------------------------------------------------------------------------------------------------------------------------------------------------------------------------------------------------------------------------------------------------------------------------------------------------------------------------------------------------------------------------------------|--------------------------------|
| <p>En el análisis conjunto de los estudios (41.183 pacientes) no mostró diferencias significativas entre el tratamiento con LABA/LAMA y el tratamiento con LABA o LAMA: RR 0.99 (0.97 a 1.01); 4 menos por 1000 (de 12 menos a 4 más) (<b>Figura 5</b>). La confianza con los resultados es moderada (ver tabla de resumen de resultados).</p> <p>El estudio EMAX, posterior a la publicación de la revisión mostró unos resultados similares.</p> | <p><b>Calidad moderada</b></p> |
| <b>Incidencia de neumonía</b>                                                                                                                                                                                                                                                                                                                                                                                                                      |                                |
| <p>En el análisis conjunto de los estudios (31.154 pacientes) no mostró diferencias significativas entre el tratamiento con LABA/LAMA y el tratamiento con LABA o LAMA: RR1.07 (0.93 a 1.23); 2 más por 1000 (de 2 menos a 6 más) (<b>Figura 6</b>). La confianza con los resultados es moderada (ver tabla de resumen de resultados).</p>                                                                                                         | <p><b>Calidad moderada</b></p> |
| <b>Mortalidad por cualquier causa</b>                                                                                                                                                                                                                                                                                                                                                                                                              |                                |
| <p>En el análisis conjunto de los estudios (31.908 pacientes) no mostró diferencias significativas entre el tratamiento con LABA/LAMA y el tratamiento con LABA o LAMA: RR 0.92 (0.75 a 1.12); 1 menos por 1000 (de 3 menos a 2 más) (<b>Figura 7</b>). La confianza con los resultados es moderada (ver tabla de resumen de resultados).</p>                                                                                                      | <p><b>Calidad moderada</b></p> |
| <b>FEV<sub>1</sub></b>                                                                                                                                                                                                                                                                                                                                                                                                                             |                                |
| <p>En el análisis conjunto de los estudios (19.740 pacientes) mostró un incremento significativo, aunque no clínicamente relevante: MD 82.64 mL más (72,25 a 93,03 más) (<b>Figura 8</b>). La confianza con los resultados es moderada (ver tabla de resumen de resultados).</p>                                                                                                                                                                   | <p><b>Calidad moderada</b></p> |
| <b>Balance entre beneficios y riesgos</b>                                                                                                                                                                                                                                                                                                                                                                                                          |                                |
| <p>En pacientes con afectación espirométrica grave o muy grave, la terapia con doble broncodilatación de inicio es superior a la monoterapia por su mayor efecto sobre la función pulmonar y los síntomas.</p>                                                                                                                                                                                                                                     |                                |
| <b>Calidad global de la evidencia</b>                                                                                                                                                                                                                                                                                                                                                                                                              |                                |
| <p>El grupo elaborador de la guía consideró la función pulmonar y la disnea como desenlaces críticos para la toma de decisiones. Los otros desenlaces se consideraron importantes pero no críticos para la toma de decisiones.</p> <p>En base a esta consideración, la calidad global de la evidencia es moderada debido a una variabilidad significativa de los resultados.</p>                                                                   |                                |
| <b>Valores y preferencias</b>                                                                                                                                                                                                                                                                                                                                                                                                                      |                                |
| <b>Uso de recursos y costes</b>                                                                                                                                                                                                                                                                                                                                                                                                                    |                                |
| <b>Recomendaciones</b>                                                                                                                                                                                                                                                                                                                                                                                                                             |                                |
| <p>En pacientes de bajo riesgo que permanecen sintomáticos con un broncodilatador de larga duración se recomienda la terapia con doble broncodilatación.</p> <p>En pacientes de alto riesgo sintomáticos (mMRC≥2) se recomienda la terapia con doble broncodilatación en comparación con el tratamiento con un solo broncodilatador.</p>                                                                                                           |                                |

## Figuras y meta-análisis

Figura 1. Disnea

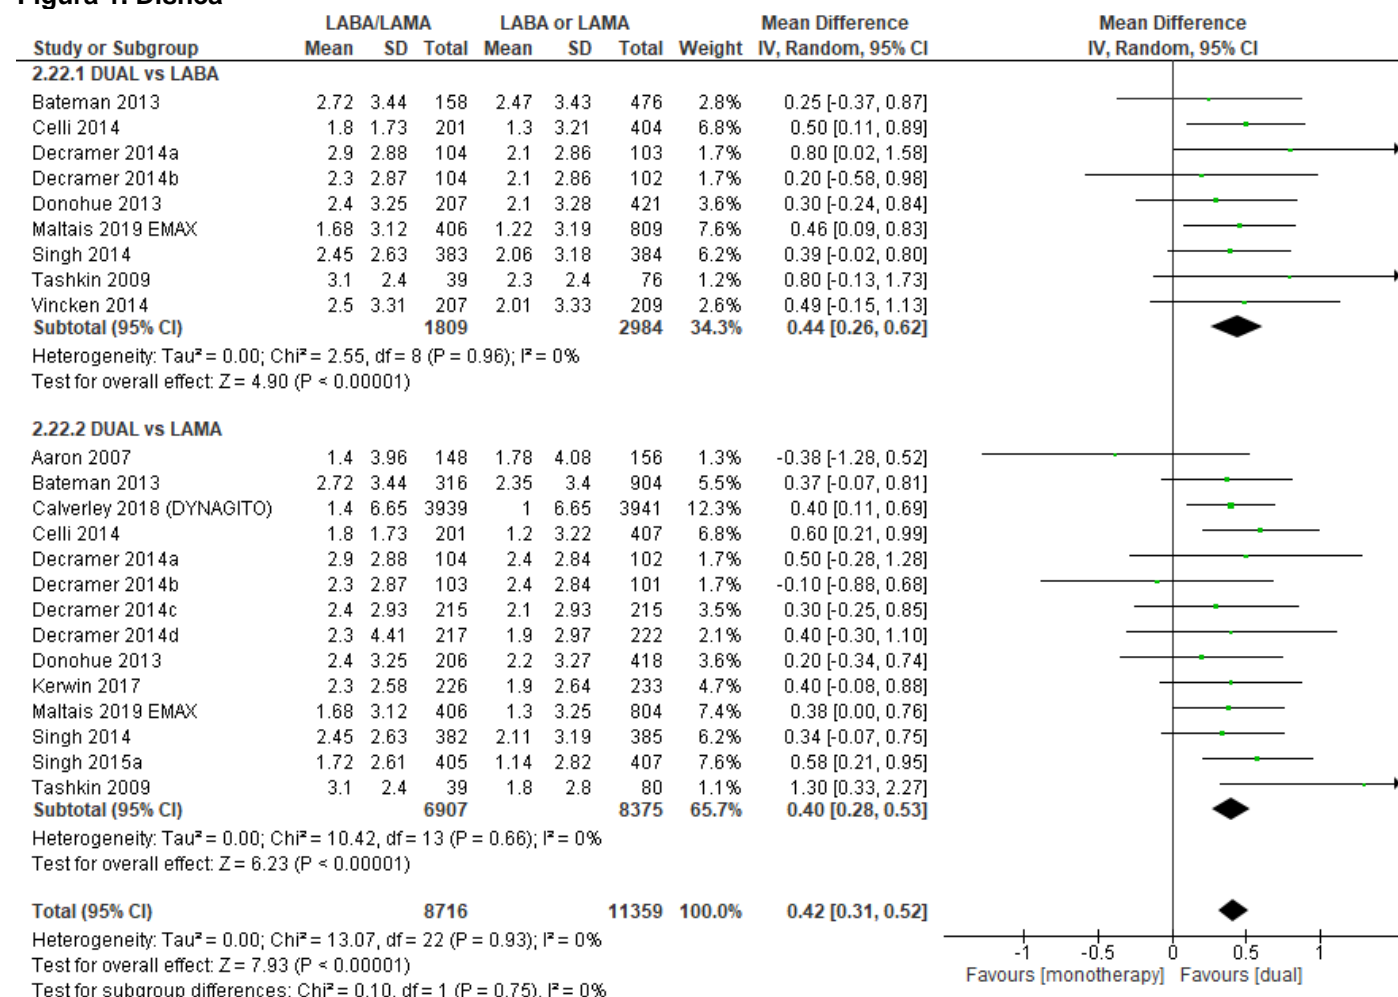

Figura 2. Hospitalizaciones

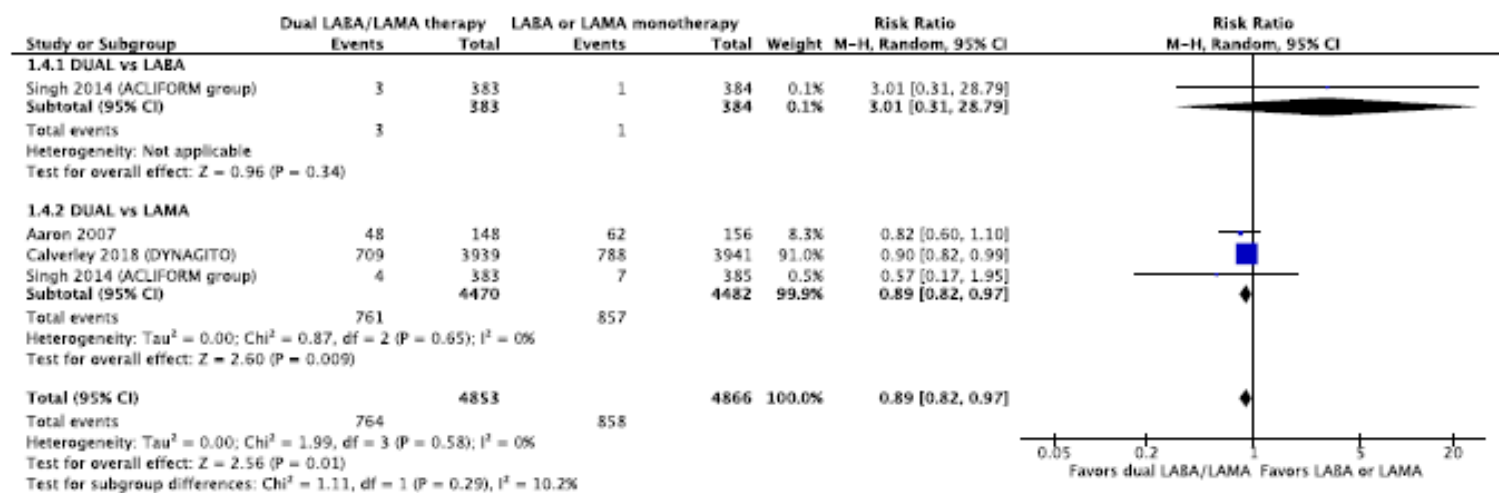

**Figura 3. Exacerbaciones agudas**

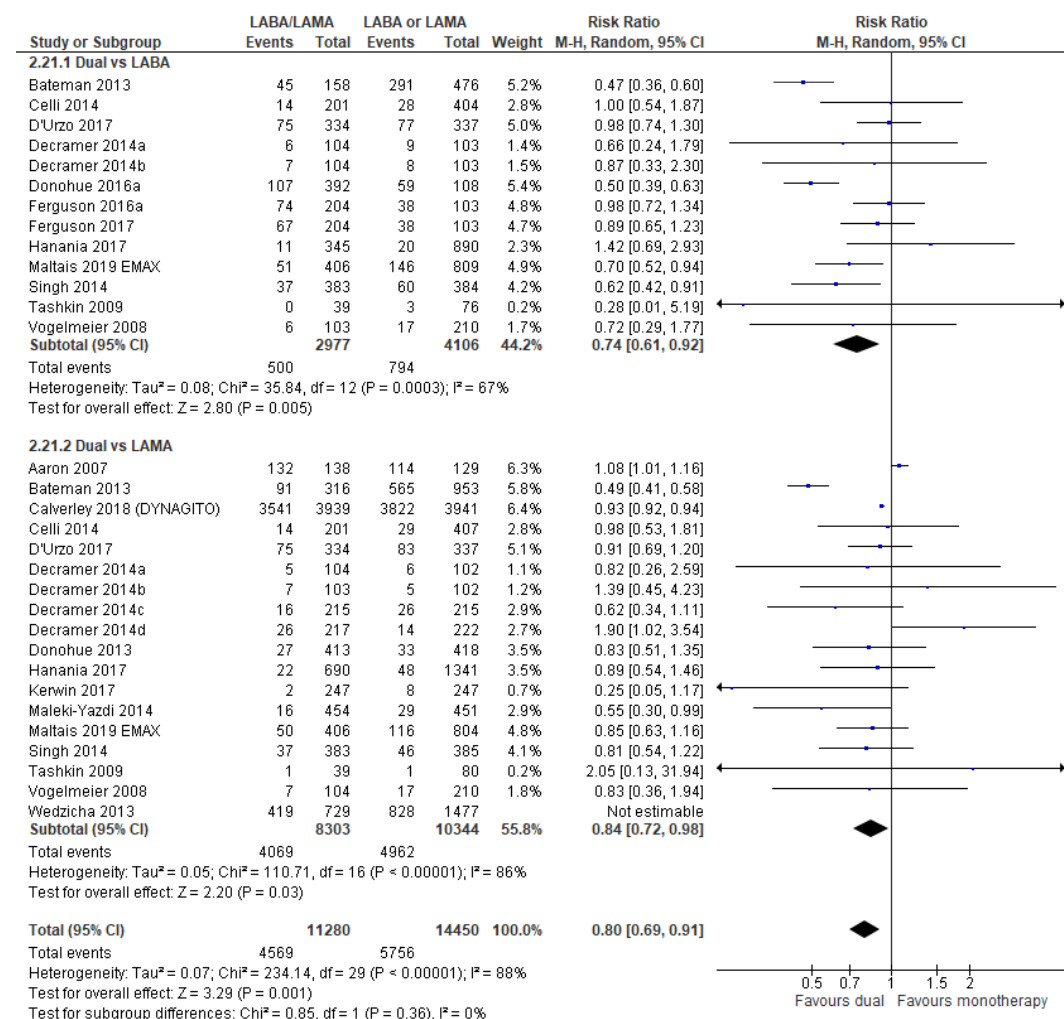

Figura 4. Calidad de vida

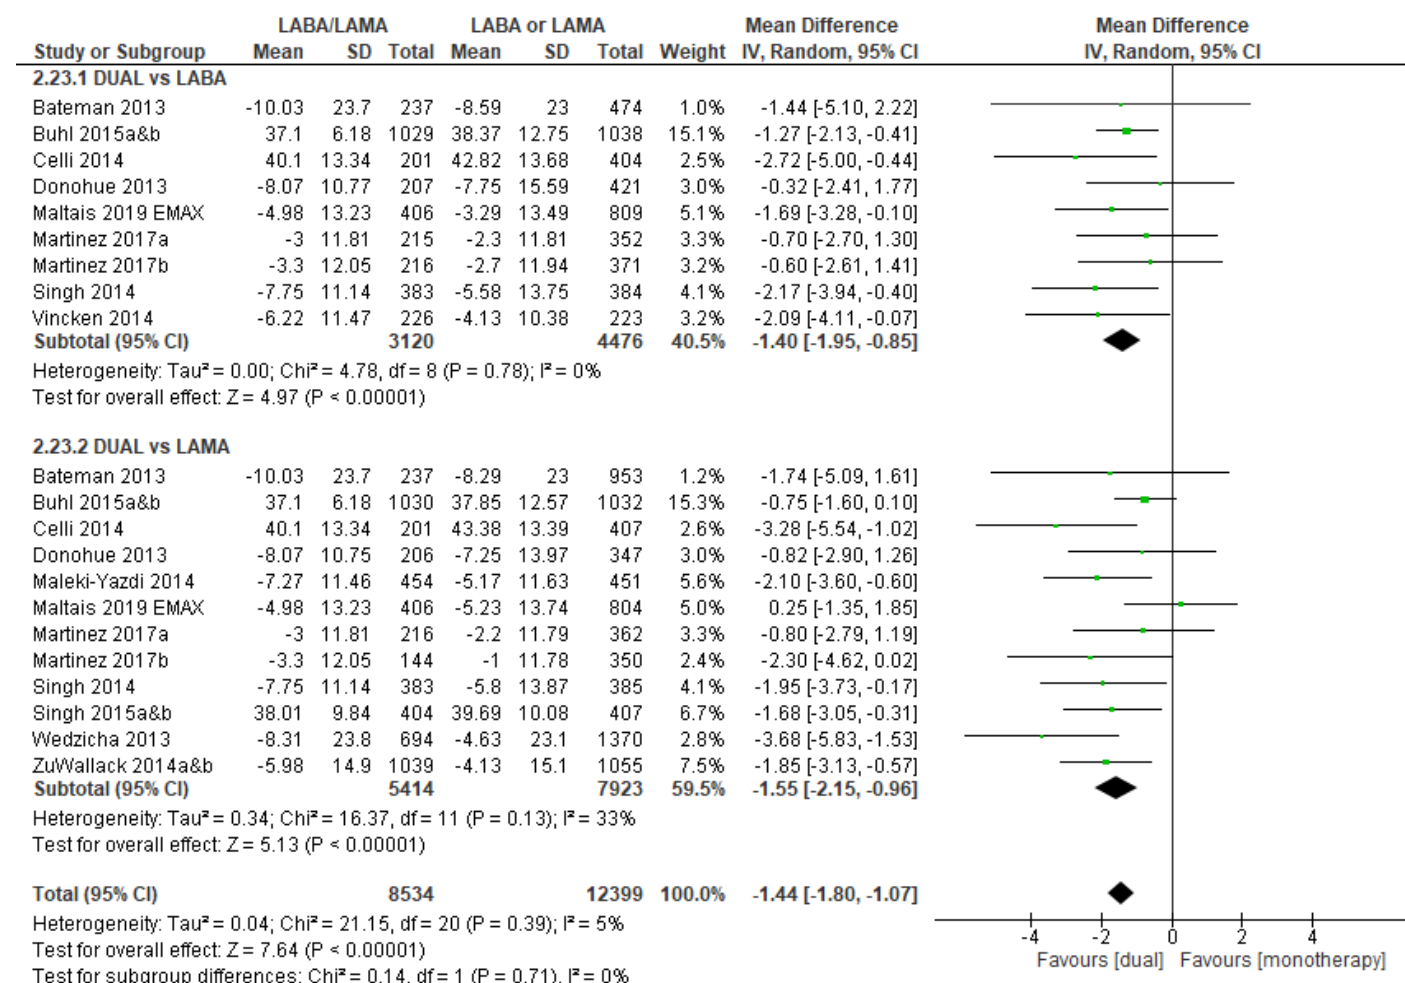



Figura 5. Efectos indeseados

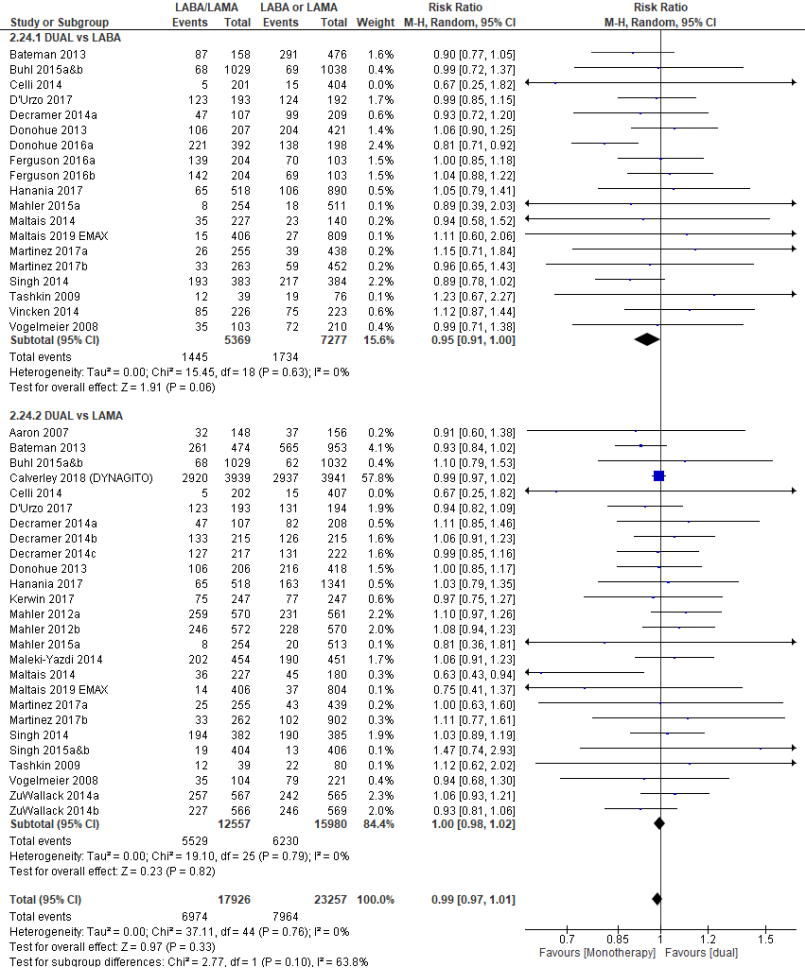

Figura 6. Incidencia de neumonía

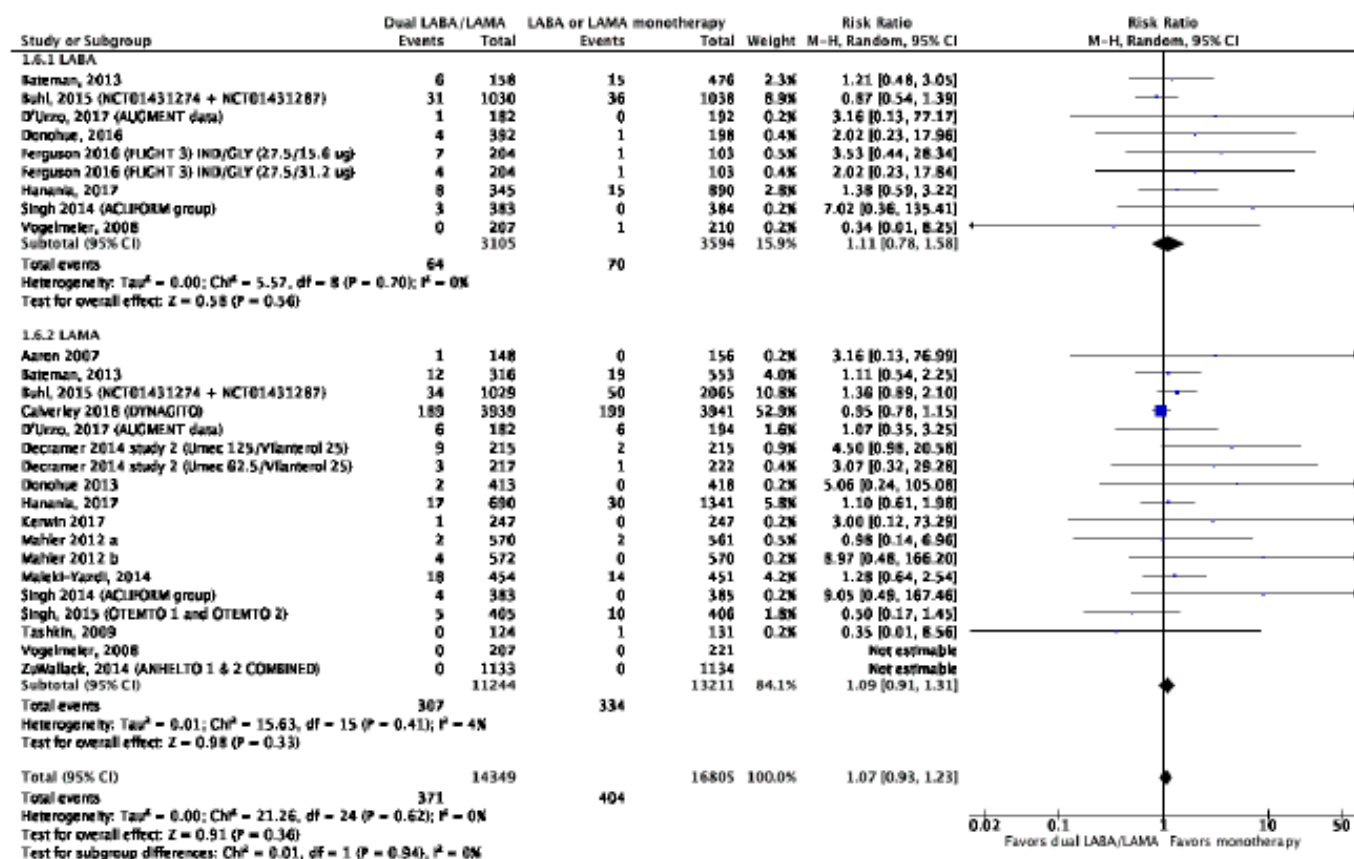

Figura 7. Mortalidad por cualquier causa

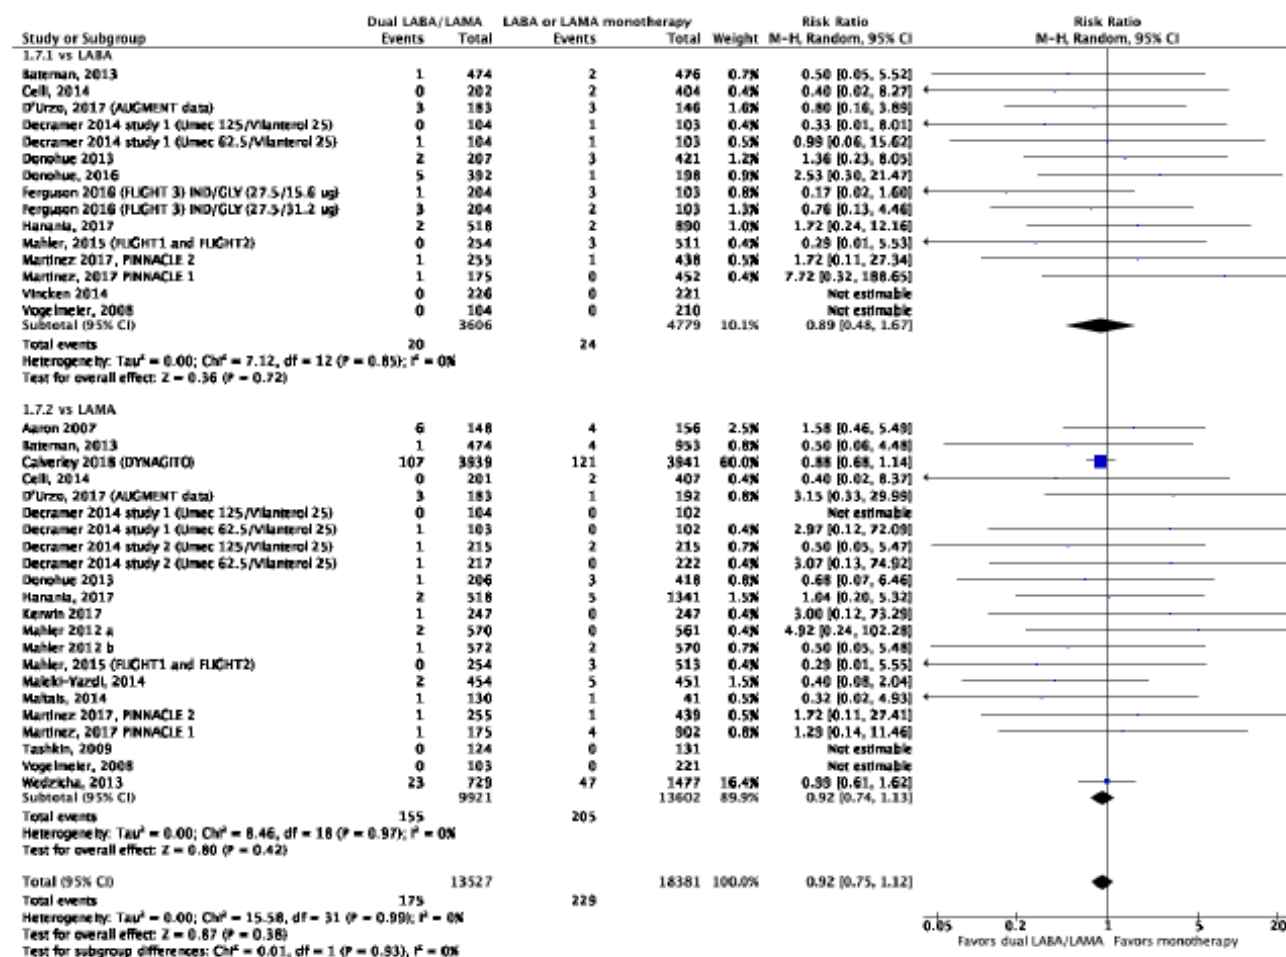

Figura 8. FEV1

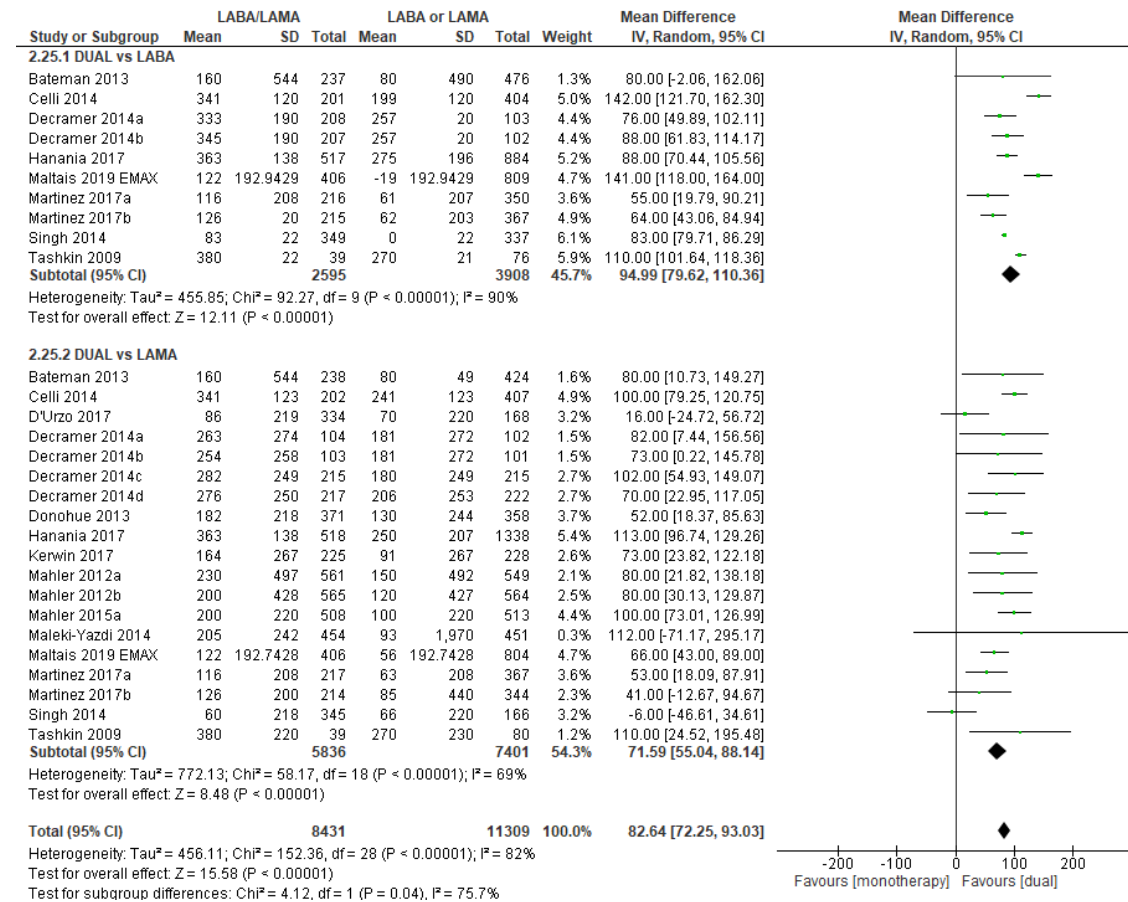

| Certainty assessment                                                              |                    |                 |                    |                     |                          |                       | Nº de pacientes       |                       | Efecto                   |                                                 | Certainty        | Importancia |
|-----------------------------------------------------------------------------------|--------------------|-----------------|--------------------|---------------------|--------------------------|-----------------------|-----------------------|-----------------------|--------------------------|-------------------------------------------------|------------------|-------------|
| Nº de estudios                                                                    | Diseño de estudio  | Riesgo de sesgo | Inconsistencia     | Evidencia indirecta | Imprecisión              | Otras consideraciones | LABA/LAMA             | LABA o LAMA           | Relativo (95% CI)        | Absoluto (95% CI)                               |                  |             |
| Disnea (seguimiento: rango 2 semanas a 52 semanas; evaluado con : TDI)            |                    |                 |                    |                     |                          |                       |                       |                       |                          |                                                 |                  |             |
| 12                                                                                | ensayos aleatorios | no es serio     | no es serio        | no es serio         | no es serio              | ninguno               | 8716                  | 11359                 | -                        | MD 0.42 SD más<br>(0.31 más a 0.52 más )        | ⊕⊕⊕⊕<br>ALTA     | CRÍTICA     |
| FEV1                                                                              |                    |                 |                    |                     |                          |                       |                       |                       |                          |                                                 |                  |             |
| 15                                                                                | ensayos aleatorios | no es serio     | serio <sup>a</sup> | no es serio         | no es serio              | ninguno               | 8431                  | 11309                 | -                        | MD 82.64 mL más<br>(72.25 más a 93.03 más )     | ⊕⊕⊕○<br>MODERADO | CRÍTICA     |
| Hospitalizaciones (seguimiento: rango 24 semanas a 52 semanas)                    |                    |                 |                    |                     |                          |                       |                       |                       |                          |                                                 |                  |             |
| 3                                                                                 | ensayos aleatorios | no es serio     | no es serio        | no es serio         | no es serio              | ninguno               | 764/4853<br>(15.7%)   | 858/4866<br>(17.6%)   | RR 0.89<br>(0.82 a 0.97) | 19 menos por 1000<br>(de 32 menos a 5 menos )   | ⊕⊕⊕⊕<br>ALTA     | IMPORTANTE  |
| Exacerbaciones agudas (seguimiento: rango 2 semanas a 64 semanas)                 |                    |                 |                    |                     |                          |                       |                       |                       |                          |                                                 |                  |             |
| 17                                                                                | ensayos aleatorios | no es serio     | serio <sup>a</sup> | no es serio         | no es serio <sup>b</sup> | ninguno               | 4569/11280<br>(40.5%) | 5756/14450<br>(39.8%) | RR 0.80<br>(0.69 a 0.91) | 80 menos por 1000<br>(de 123 menos a 36 menos ) | ⊕⊕⊕○<br>MODERADO | IMPORTANTE  |
| Calidad de vida (seguimiento: rango 12 semanas a 52 semanas; evaluado con : SGRQ) |                    |                 |                    |                     |                          |                       |                       |                       |                          |                                                 |                  |             |
| 12                                                                                | ensayos aleatorios | no es serio     | no es serio        | no es serio         | no es serio              | ninguno               | 8534                  | 12399                 | -                        | MD 1.44 SD menos<br>(1.8 menos a 1.07 menos )   | ⊕⊕⊕⊕<br>ALTA     | IMPORTANTE  |
| Efectos indeseados (seguimiento: rango 2 semanas a 52 semanas)                    |                    |                 |                    |                     |                          |                       |                       |                       |                          |                                                 |                  |             |
| 24                                                                                | ensayos aleatorios | no es serio     | no es serio        | no es serio         | serio <sup>c</sup>       | ninguno               | 6974/17926<br>(38.9%) | 7964/23257<br>(34.2%) | RR 0.99<br>(0.97 a 1.01) | 3 menos por 1000<br>(de 10 menos a 3 más )      | ⊕⊕⊕○<br>MODERADO | IMPORTANTE  |
| Incidencia de neumonía                                                            |                    |                 |                    |                     |                          |                       |                       |                       |                          |                                                 |                  |             |
| 18                                                                                | ensayos aleatorios | no es serio     | no es serio        | no es serio         | serio <sup>c</sup>       | ninguno               | 371/14349<br>(2.6%)   | 404/16805<br>(2.4%)   | RR 1.07<br>(0.93 a 1.23) | 2 más por 1000<br>(de 2 menos a 6 más )         | ⊕⊕⊕○<br>MODERADO | IMPORTANTE  |
| Mortalidad por cualquier causa                                                    |                    |                 |                    |                     |                          |                       |                       |                       |                          |                                                 |                  |             |
| 19                                                                                | ensayos aleatorios | no es serio     | no es serio        | no es serio         | serio <sup>c</sup>       | ninguno               | 177/13527<br>(1.3%)   | 234/18381<br>(1.3%)   | RR 0.92<br>(0.75 a 1.12) | 1 menos por 1000<br>(de 3 menos a 2 más )       | ⊕⊕⊕○<br>MODERADO | IMPORTANTE  |

CI: Intervalo de confianza ; MD: Diferencia media; RR: Razón de riesgo

## Explicaciones

- a. Heterogeneidad significativa.
- b. Aunque el IC95% es amplio, se cumple con el tamaño de información óptimo (eventos > 300 y población total > 400).
- c. Aunque el número de eventos es adecuado, el intervalo de confianza incluye el efecto y no efecto.

## Pregunta 2.

### Para el tratamiento inicial en un paciente agudizador no eosinofílico ¿Qué tratamiento es de elección LABA/LAMA o LABA/CI?

Se identificó una revisión sistemática (RS) que comparó la eficacia y la seguridad de cuatro grupos terapéuticos solos o en combinación (LABA/LAMA, LABA/ICS, LAMA y LABA) en pacientes con EPOC (de moderada a grave). Para el análisis se seleccionaron los 9 ECAs que compararon la administración de LABA/LAMA frente a LABA/ICS.

Posterior a la publicación de esta revisión, se identificaron tres ensayos clínicos: ETHOS (Rabe 2020), IMPACT (Lipson 2018) y FLASH (Firth 2018) que se han incluido en el análisis conjunto de los resultados para la comparación de LABA/LAMA frente a LABA/ICS.

#### Revisión sistemática:

1. Oba Y, Keeney E, Ghatehorde N, Dias S. Dual combination therapy versus long-acting bronchodilators alone for chronic obstructive pulmonary disease (COPD): a systematic review and network meta-analysis. *Cochrane Database Syst Rev*. 2018 Dec 3;12(12):CD012620.

#### Ensayos clínicos aleatorizados:

2. Donohue JF, Worsley S, Zhu CQ, Hardaker L, Church A. Improvements in lung function with umeclidinium/vilanterol versus fluticasone propionate/salmeterol in patients with moderate-to-severe COPD and infrequent exacerbations. *Respiratory Medicine* 2015a;109(7):870–81.
3. Donohue JF, Worsley S, Zhu CQ, Hardaker L, Church A. Improvements in lung function with umeclidinium/vilanterol versus fluticasone propionate/salmeterol in patients with moderate-to-severe COPD and infrequent exacerbations. *Respiratory Medicine* 2015b;109(7):870–81.
4. Frith PA, Ashmawi S, Krishnamurthy S, Gurgun A, Hristoskova S, Pilipovic V, et al. Efficacy and safety of the direct switch to indacaterol/glycopyrronium from salmeterol/fluticasone in non-frequently exacerbating COPD patients: The FLASH randomized controlled trial. *Respirology*. 2018;23(12):1152-9.
5. Hoshino M, Ohtawa J, Akitsu K. Comparison of airway dimensions with once daily tiotropium plus indacaterol versus twice daily Advair in chronic obstructive pulmonary disease. *Pulmonary Pharmacology & Therapeutics* 2015;30:128–33.
6. Singh D, Worsley S, Zhu CQ, Hardaker L, Church A. Umeclidinium/vilanterol versus fluticasone propionate/salmeterol in COPD: a randomised trial. *BMC Pulmonary Medicine* 2015c;15:91.
7. Vogelmeier CF, Bateman ED, Pallante J, Alagappan VK, D'Andrea P, Chen H, et al. Efficacy and safety of once-daily QVA149 compared with twice-daily salmeterol-fluticasone in patients with chronic obstructive pulmonary disease (ILLUMINATE): a randomised, double-blind, parallel group study. *Lancet Respiratory Medicine* 2013a;1(1):51–60.
8. Vogelmeier C, Paggiaro PL, Dorca J, Sliwinski P, Mallet M, Kirsten AM, et al. Efficacy and safety of aclidinium/formoterol versus salmeterol/fluticasone: a phase 3 COPD study. *European Respiratory Journal* 2016;48(4):1030–39.
9. Vogelmeier CF, Gaga M, Aalamian-Mattheis M, Greulich T, Marin JM5, Castellani W, et al. Efficacy and safety of direct switch to indacaterol/glycopyrronium in patients with moderate COPD: the CRYSTAL open-label randomised trial. *Respiratory Research* 2017;18(1):140.
10. Wedzicha JA, Banerji D, Chapman KR, Vestbo J, Roche N, Ayers RT, et al. Indacaterol-glycopyrronium versus salmeterol-fluticasone for COPD. *New England Journal of Medicine* 2016;374(23):2222–34.
11. Zhong N, Wang C, Zhou X, Zhang N, Humphries M, Wang L, et al. LANTERN: a randomized study of QVA149 versus salmeterol/fluticasone combination in patients with COPD. *International Journal of Chronic Obstructive Pulmonary Disease* 2015;10:1015–26.
12. Rabe KF, Martinez FJ, Ferguson GT, Wang C, Singh D, Wedzicha JA, Trivedi R, St Rose E, Ballal S, McLaren J, Darken P, Aurivillius M, Reisner C, Dorinsky P; ETHOS

Investigators. Triple Inhaled Therapy at Two Glucocorticoid Doses in Moderate-to-Very-Severe COPD. N Engl J Med. 2020 Jul 2;383(1):35-48. doi: 10.1056/NEJMoa1916046. Epub 2020 Jun 24. PMID: 32579807.

13. Lipson DA, Barnhart F, Brealey N, Brooks J, Criner GJ, Day NC, Dransfield MT, Halpin DMG, Han MK, Jones CE, Kilbride S, Lange P, Lomas DA, Martinez FJ, Singh D, Tabberer M, Wise RA, Pascoe SJ; IMPACT Investigators. Once-Daily Single-Inhaler Triple versus Dual Therapy in Patients with COPD. N Engl J Med. 2018;378(18):1671-1680.

## LABA/LAMA vs LABA/ICS

### Agudizaciones moderadas-graves

Para el análisis de la frecuencia de exacerbaciones moderadas-graves se incluyeron aquellos estudios con al menos un año de seguimiento y que aportaran resultados de densidad de incidencia (número de eventos por paciente y año).

El análisis conjunto de los datos de 3 ECAs (13.798 pacientes) no mostró diferencias entre LABA/LAMA y LABA/ICS respecto a la frecuencia de exacerbaciones: rate ratio 1.03 (IC95% 0.98 a 1.07). La variabilidad de los resultados fue muy relevante debido a las diferencias en los criterios de inclusión de los estudios.

El estudio que incluyó un perfil de pacientes más similar al de la pregunta clínica, es decir con un menor número de exacerbaciones y que excluyó a pacientes con eosinófilos >600 mL, mostró que esta población se podría beneficiar en mayor medida de un tratamiento combinado (Wedzicha 2016) mostró un beneficio asociado a la doble broncodilatación (rate ratio 0,88; IC95% 0.82 a 0.94).

Por el contrario, los dos estudios que incluyeron una población con un mayor número de exacerbaciones, la mayoría con tratamientos previos (Lipson 2018 – IMPACT; Rabe 2020 - ETHOS) mostraron un beneficio significativo con el tratamiento combinado con corticoides inhalados (el grupo que recibió doble broncodilatación presentó entre un 13 y un 15% más exacerbaciones por paciente y año)

La confianza baja denota que la decisión no se debe basar en el estimador conjunto de los resultados de estos tres estudios. El grupo elaborador de la guía consideró que, aunque los tres estudios evaluaron la doble broncodilatación frente a tratamiento combinado, ninguno de los tres estudios evaluó esta comparación como tratamiento inicial en un paciente agudizador no eosinofílico (ver tabla de resumen de resultados).

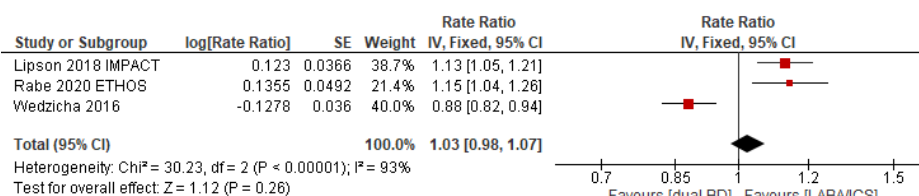

*\*Los IC 95% para la comparación entre doble broncodilatación y tratamiento combinado de los estudios Lipson 2018 – IMPACT y Rabe 2020 – ETHOS han sido extrapolados a partir de los errores estándar (SE) de las comparaciones entre triple terapia y doble broncodilatación de estos mismos estudios.*

**Calidad baja**

### Agudizaciones graves

Para el análisis de la frecuencia de exacerbaciones graves se incluyeron aquellos estudios con al menos un año de seguimiento y que aportaran resultados de densidad de incidencia (número de eventos por paciente y año).

**Calidad baja**



El análisis conjunto de los datos de 3 ECAs (13.798 pacientes) no mostró diferencias entre LABA/LAMA y LABA/ICS respecto a la frecuencia de exacerbaciones: rate ratio 1.06 (IC95% 0.95 a 1.19). La variabilidad de los resultados fue muy relevante que parece asociarse a la inclusión de poblaciones con mayor o menor riesgo de exacerbaciones.

Similar al efecto observado en el análisis de las exacerbaciones moderadas a graves, el estudio que incluyó un perfil de pacientes más similar al de la pregunta clínica, es decir con un menor número de exacerbaciones y que excluyó a pacientes con eosinófilos >600 mL, mostró que esta población se podría beneficiar en mayor medida de un tratamiento combinado (Wedzicha 2016) aunque las diferencias no fueron significativas (rate ratio 0,87; IC95% 0.69 a 1.10).

También para este desenlace, la confianza baja denota que la decisión no se debe basar en el estimador conjunto de los resultados de estos tres estudios. El grupo elaborador de la guía consideró que, aunque los tres estudios evaluaron la doble broncodilatación frente a tratamiento combinado, ninguno de los tres estudios evaluó esta comparación como tratamiento inicial en un paciente agudizador no eosinofílico (ver tabla de resumen de resultados).

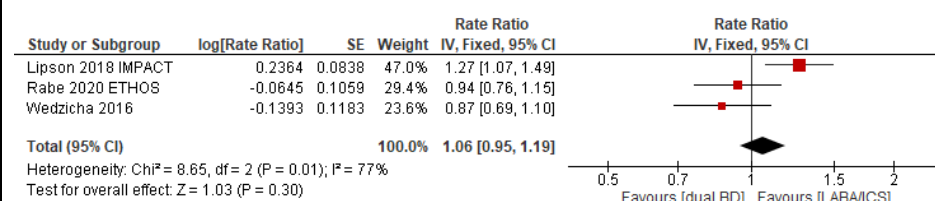

\*Los IC 95% para la comparación entre doble broncodilatación y tratamiento combinado de los estudios Lipson 2018 – IMPACT y Rabe 2020 – ETHOS han sido extrapolados a partir de los errores estándar (SE) de las comparaciones entre triple terapia y doble broncodilatación de estos mismos estudios.

#### Calidad de vida (SGRQ, respondedores: disminución de 4 puntos o más)

A los 3 meses, el análisis conjunto de los datos (4 ECAs, 2397 pacientes) no mostró diferencias significativas entre LABA/LAMA y LABA/ICS respecto al porcentaje de respondedores al cuestionario SGRQ de calidad de vida: OR 1.08 (IC95% 0.92 a 1.27); 19 más por 1000 (de 21 menos a 59 más). La confianza con los resultados es moderada (ver tabla de resumen de resultados)

A los 6-12 meses, el análisis conjunto de los datos (4 ECAs, 14044 pacientes) no mostró diferencias respecto al porcentaje de respondedores al cuestionario SGRQ de calidad de vida: 1.07 (IC95% 0.91 a 1.25); 16 más por 1000 (de 22 menos a 54 más). La confianza con los resultados es moderada (ver tabla de resumen de resultados).

**Calidad  
moderada**

| Study or Subgroup                                                                                                                                                                                                                                                                                                                                                                                                                                                                                                                                                                                                                                                                                                                                                                                                                                                                                                                                                                                                                                                                                                                                                                                                                                                                                                                                                                        | LABA/LAMA<br>Events Total | LABA/ICS<br>Events Total | Weight | Odds Ratio<br>M-H, Random, 95% CI | Odds Ratio<br>M-H, Random, 95% CI |
|------------------------------------------------------------------------------------------------------------------------------------------------------------------------------------------------------------------------------------------------------------------------------------------------------------------------------------------------------------------------------------------------------------------------------------------------------------------------------------------------------------------------------------------------------------------------------------------------------------------------------------------------------------------------------------------------------------------------------------------------------------------------------------------------------------------------------------------------------------------------------------------------------------------------------------------------------------------------------------------------------------------------------------------------------------------------------------------------------------------------------------------------------------------------------------------------------------------------------------------------------------------------------------------------------------------------------------------------------------------------------------------|---------------------------|--------------------------|--------|-----------------------------------|-----------------------------------|
| <b>1.3.1 at 3 months</b>                                                                                                                                                                                                                                                                                                                                                                                                                                                                                                                                                                                                                                                                                                                                                                                                                                                                                                                                                                                                                                                                                                                                                                                                                                                                                                                                                                 |                           |                          |        |                                   |                                   |
| Donohue 2015a                                                                                                                                                                                                                                                                                                                                                                                                                                                                                                                                                                                                                                                                                                                                                                                                                                                                                                                                                                                                                                                                                                                                                                                                                                                                                                                                                                            | 171 315                   | 173 316                  | 26.2%  | 0.98 [0.72, 1.34]                 |                                   |
| Donohue 2015b                                                                                                                                                                                                                                                                                                                                                                                                                                                                                                                                                                                                                                                                                                                                                                                                                                                                                                                                                                                                                                                                                                                                                                                                                                                                                                                                                                            | 169 322                   | 143 309                  | 26.3%  | 1.28 [0.94, 1.75]                 |                                   |
| Singh 2015c                                                                                                                                                                                                                                                                                                                                                                                                                                                                                                                                                                                                                                                                                                                                                                                                                                                                                                                                                                                                                                                                                                                                                                                                                                                                                                                                                                              | 168 330                   | 168 337                  | 27.9%  | 1.04 [0.77, 1.41]                 |                                   |
| Vogelmeier 2013a                                                                                                                                                                                                                                                                                                                                                                                                                                                                                                                                                                                                                                                                                                                                                                                                                                                                                                                                                                                                                                                                                                                                                                                                                                                                                                                                                                         | 116 230                   | 119 238                  | 19.6%  | 1.02 [0.71, 1.46]                 |                                   |
| Subtotal (95% CI)                                                                                                                                                                                                                                                                                                                                                                                                                                                                                                                                                                                                                                                                                                                                                                                                                                                                                                                                                                                                                                                                                                                                                                                                                                                                                                                                                                        | 1197                      | 1200                     | 100.0% | 1.08 [0.92, 1.27]                 |                                   |
| Total events                                                                                                                                                                                                                                                                                                                                                                                                                                                                                                                                                                                                                                                                                                                                                                                                                                                                                                                                                                                                                                                                                                                                                                                                                                                                                                                                                                             | 624                       | 603                      |        |                                   |                                   |
| Heterogeneity: Tau <sup>2</sup> = 0.00; Chi <sup>2</sup> = 1.67, df = 3 (P = 0.64); I <sup>2</sup> = 0%                                                                                                                                                                                                                                                                                                                                                                                                                                                                                                                                                                                                                                                                                                                                                                                                                                                                                                                                                                                                                                                                                                                                                                                                                                                                                  |                           |                          |        |                                   |                                   |
| Test for overall effect: Z = 0.93 (P = 0.35)                                                                                                                                                                                                                                                                                                                                                                                                                                                                                                                                                                                                                                                                                                                                                                                                                                                                                                                                                                                                                                                                                                                                                                                                                                                                                                                                             |                           |                          |        |                                   |                                   |
| <b>1.3.2 at 6 to 12 months</b>                                                                                                                                                                                                                                                                                                                                                                                                                                                                                                                                                                                                                                                                                                                                                                                                                                                                                                                                                                                                                                                                                                                                                                                                                                                                                                                                                           |                           |                          |        |                                   |                                   |
| Lipson 2018 IMPACT                                                                                                                                                                                                                                                                                                                                                                                                                                                                                                                                                                                                                                                                                                                                                                                                                                                                                                                                                                                                                                                                                                                                                                                                                                                                                                                                                                       | 696 2070                  | 1390 4134                | 30.6%  | 1.00 [0.89, 1.12]                 |                                   |
| Rabe 2020 ETHOS                                                                                                                                                                                                                                                                                                                                                                                                                                                                                                                                                                                                                                                                                                                                                                                                                                                                                                                                                                                                                                                                                                                                                                                                                                                                                                                                                                          | 893 2096                  | 949 2122                 | 29.7%  | 0.92 [0.81, 1.04]                 |                                   |
| Vogelmeier 2013a                                                                                                                                                                                                                                                                                                                                                                                                                                                                                                                                                                                                                                                                                                                                                                                                                                                                                                                                                                                                                                                                                                                                                                                                                                                                                                                                                                         | 117 211                   | 106 216                  | 11.5%  | 1.29 [0.88, 1.89]                 |                                   |
| Wedzicha 2016                                                                                                                                                                                                                                                                                                                                                                                                                                                                                                                                                                                                                                                                                                                                                                                                                                                                                                                                                                                                                                                                                                                                                                                                                                                                                                                                                                            | 788 1602                  | 696 1593                 | 28.2%  | 1.25 [1.09, 1.43]                 |                                   |
| Subtotal (95% CI)                                                                                                                                                                                                                                                                                                                                                                                                                                                                                                                                                                                                                                                                                                                                                                                                                                                                                                                                                                                                                                                                                                                                                                                                                                                                                                                                                                        | 5979                      | 8065                     | 100.0% | 1.07 [0.91, 1.25]                 |                                   |
| Total events                                                                                                                                                                                                                                                                                                                                                                                                                                                                                                                                                                                                                                                                                                                                                                                                                                                                                                                                                                                                                                                                                                                                                                                                                                                                                                                                                                             | 2494                      | 3141                     |        |                                   |                                   |
| Heterogeneity: Tau <sup>2</sup> = 0.02; Chi <sup>2</sup> = 12.34, df = 3 (P = 0.006); I <sup>2</sup> = 76%                                                                                                                                                                                                                                                                                                                                                                                                                                                                                                                                                                                                                                                                                                                                                                                                                                                                                                                                                                                                                                                                                                                                                                                                                                                                               |                           |                          |        |                                   |                                   |
| Test for overall effect: Z = 0.83 (P = 0.41)                                                                                                                                                                                                                                                                                                                                                                                                                                                                                                                                                                                                                                                                                                                                                                                                                                                                                                                                                                                                                                                                                                                                                                                                                                                                                                                                             |                           |                          |        |                                   |                                   |
| Test for subgroup differences: Chi <sup>2</sup> = 0.01, df = 1 (P = 0.93), I <sup>2</sup> = 0%                                                                                                                                                                                                                                                                                                                                                                                                                                                                                                                                                                                                                                                                                                                                                                                                                                                                                                                                                                                                                                                                                                                                                                                                                                                                                           |                           |                          |        |                                   |                                   |
|                                                                                                                                                                                                                                                                                                                                                                                                                                                                                                                                                                                                                                                                                                                                                                                                                                                                                                                                                                                                                                                                                                                                                                                                                                                                                                                                                                                          |                           |                          |        |                                   |                                   |
| <b>Calidad de vida (SGRQ, cambio respecto al basal)</b>                                                                                                                                                                                                                                                                                                                                                                                                                                                                                                                                                                                                                                                                                                                                                                                                                                                                                                                                                                                                                                                                                                                                                                                                                                                                                                                                  |                           |                          |        |                                   |                                   |
| <p>A los 3 meses, el análisis conjunto de los datos (6 ECAs, 6342 pacientes) no mostró diferencias significativas entre los dos grupos respecto al cambio de puntuación en el cuestionario SGRQ de calidad de vida: MD 0.49 menos (1.41 menos a 0.43 más). La confianza con los resultados es alta.</p> <p>A los 6 meses, el análisis conjunto de los datos (3 ECAs, 4360 pacientes) mostró una reducción significativa en la puntuación (indicando una mejor calidad de vida) favorable a la doble broncodilatación (LABA/LAMA): MD 1.18 menos (2.20 menos a 0.16 menos). La confianza con los resultados es alta (ver tabla de resumen de resultados).</p> <p>A los 12 meses, tres ECA (10.884 pacientes) no mostró diferencias significativas entre los dos grupos respecto al cambio de puntuación en el cuestionario SGRQ de calidad de vida: MD 0.22 menos (1.09 menos a 0.64 más). La confianza con los resultados es alta (ver tabla de resumen de resultados).</p> <p>A pesar de que los resultados muestran una mejora en la puntuación de la calidad de vida favorable a la doble broncodilatación, los resultados en su conjunto no muestran diferencias clínicamente relevantes (considerando una variación de 4 puntos o más en el cuestionario SGRQ como relevante) (Jones 2005).</p> <p>Jones PW. St. George's Respiratory Questionnaire: MCID. COPD 2005; 2: 75–79.</p> |                           |                          |        |                                   | <b>Calidad alta</b>               |

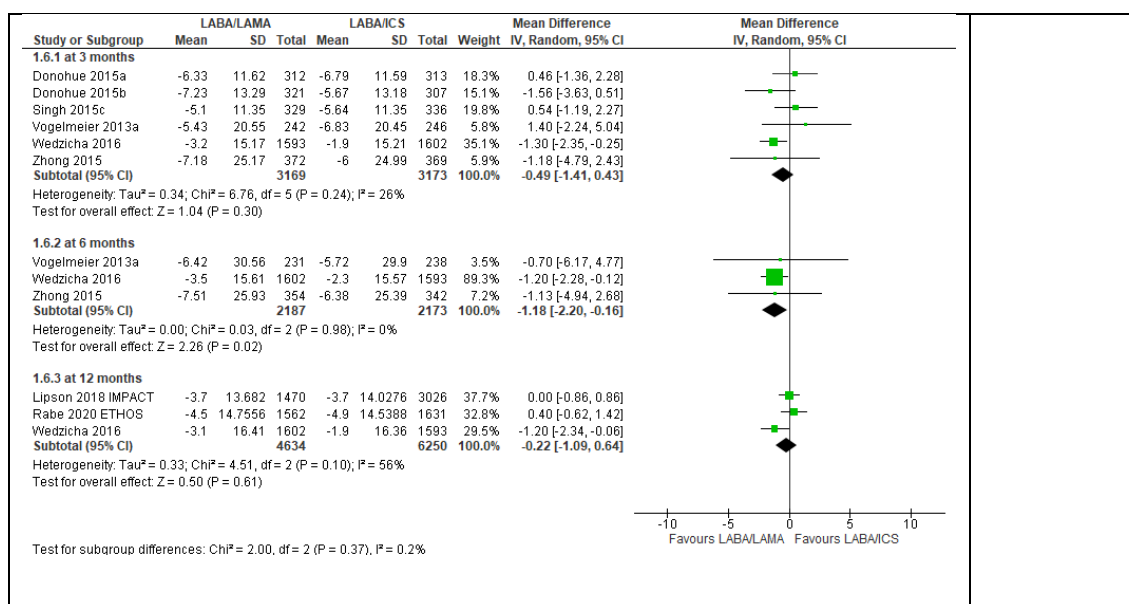

### Índice transicional de disnea (TDI)

A los 3 meses, el análisis conjunto de los datos (7 ECAs, 4626 pacientes) mostró un aumento significativo del índice TDI (mejora de la disnea) favorable a la doble broncodilatación: MD 0.41 más (0.09 más a 0.73 más). La confianza con los resultados es alta.

A los 6 meses, el análisis conjunto de los datos (4 ECAs, 5784 pacientes) no mostró diferencias entre los dos tratamientos: MD 0.06 menos (0.21 menos a 0.09 más). La confianza con los resultados es alta (ver tabla de resumen de resultados).

Las diferencias detectadas en el índice TDI a los 3 y los 6 meses en su conjunto no muestran diferencias clínicamente relevantes (considerando una variación de 1 punto o más en el índice TDI como relevante) (Witek 2003).

Witek TJ, Mahler DA. Minimal important difference of the transition dyspnoea index in a multinational clinical trial. ERJ 2003 21: 267-272;

**Calidad alta**

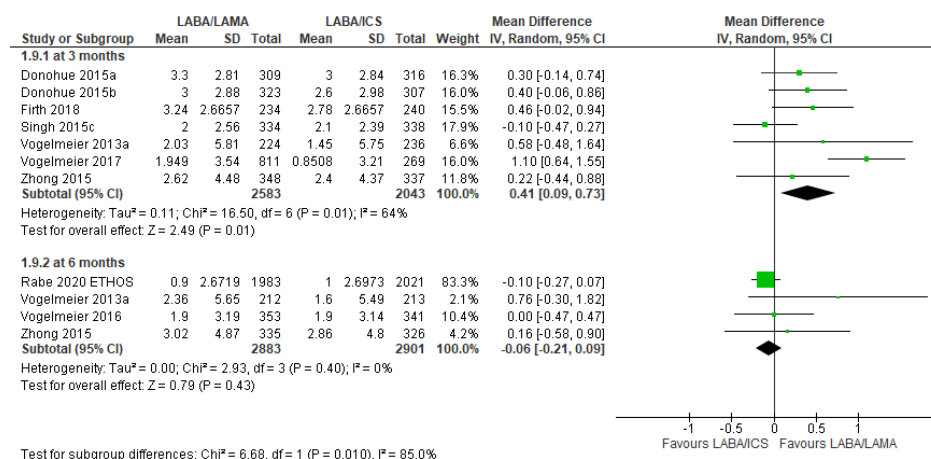

### Función pulmonar - FEV<sub>1</sub> (cambio desde el inicio)

A los 3 y 6 meses, el análisis conjunto de los datos (8 ECAs, 6938 pacientes y 4 ECAs, 5292 pacientes, respectivamente) mostró un aumento significativo, aunque no clínicamente relevante de la FEV<sub>1</sub> favorable a la doble broncodilatación: MD 0.07 más (0.04 más a 0.10 más) y MD 0.09 más (0.07 más a 0.11 más), respectivamente. La confianza con los resultados es alta (ver tabla de resumen de resultados).

**Calidad alta**

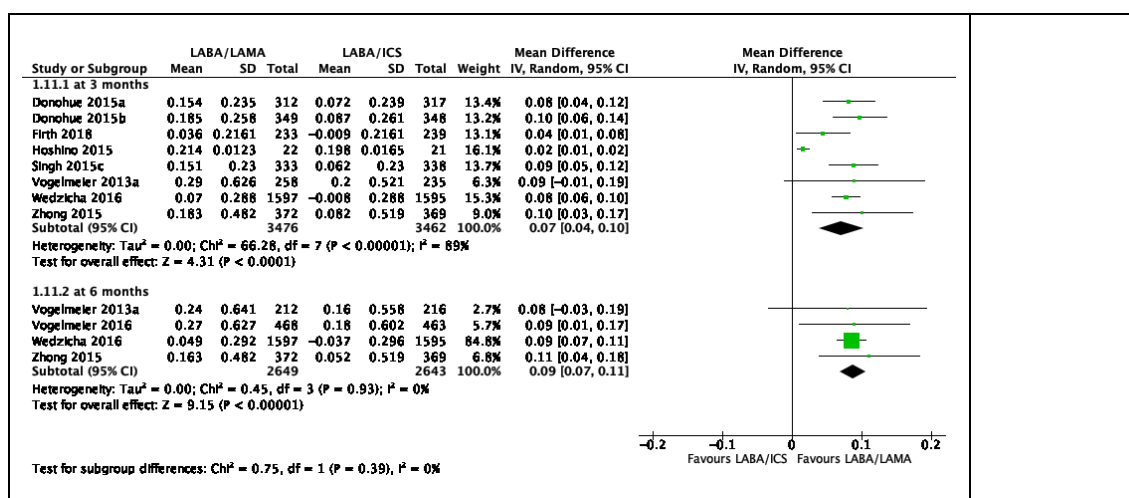

## Mortalidad

El análisis conjunto de los datos (12 ECAs, 19.758 pacientes) mostró un incremento significativo de la mortalidad asociado a la doble broncodilatación: OR 1.37 (de 1.05 a 1.78); 4 más por 1000 (de 1 a 8 más). La confianza con los resultados es moderada (ver tabla de resumen de resultados).

**Calidad moderada**

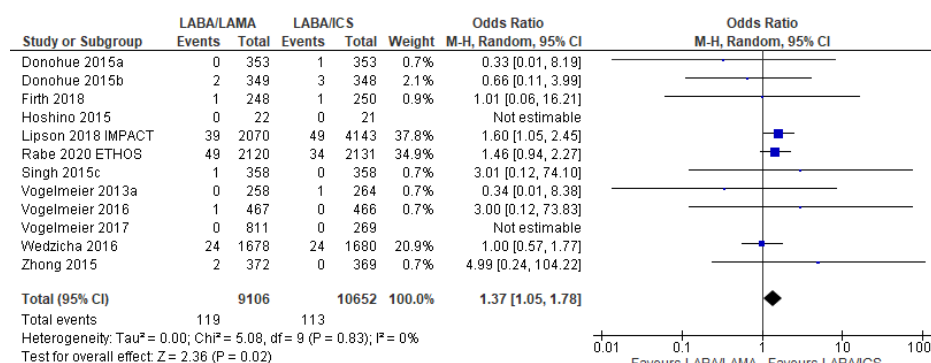

\*Datos según población ITT del cuerpo de la publicación para el estudio ETHOS al ser la diferencia más conservadora.

## Efectos indeseados serios

En el análisis conjunto de los datos (12 ECAs, 19.759 pacientes) no mostró diferencias respecto al número de pacientes con efectos indeseados serios: OR 0.99 (0.88 a 1.11); 1 menos por 1000 (de 17 menos a 15 más). La confianza con estos resultados es moderada (ver tabla de resumen de resultados).

**Calidad moderada**

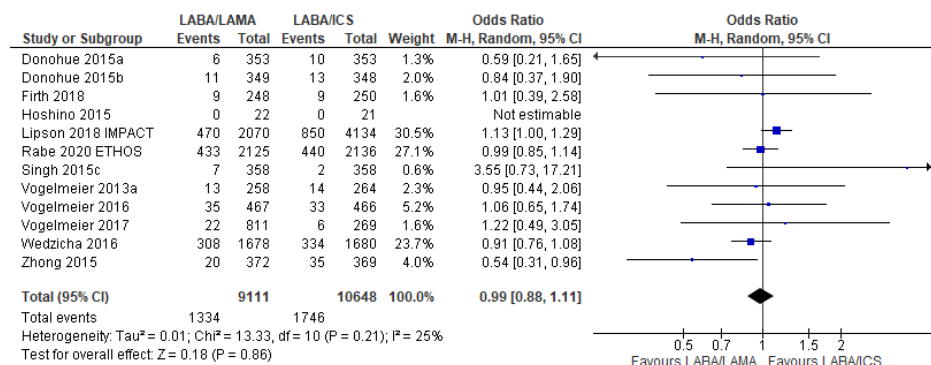

## Efectos indeseados graves (EPOC)

En el análisis conjunto de los datos (12 ECAs, 19.859 pacientes) no mostró diferencias respecto al número de pacientes con efectos indeseados graves

**Calidad moderada**

relacionados con EPOC: OR 0.96 (0.76 a 1.21); 3 menos por 1000 (de 20 menos a 16 más). La confianza con estos resultados es moderada (ver tabla de resumen de resultados).

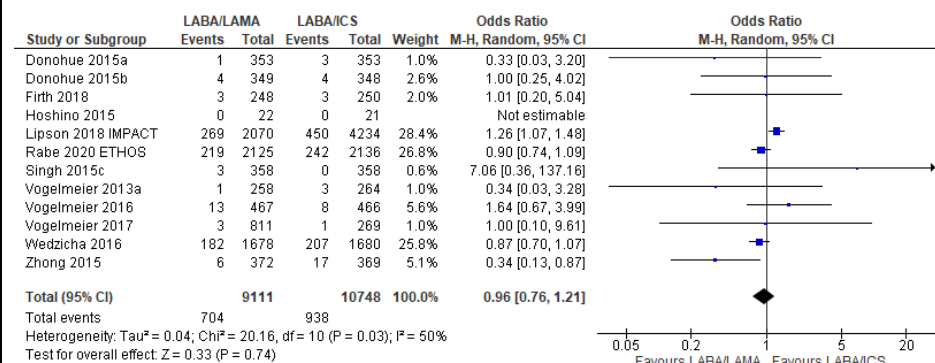

### Eventos adversos graves (cardiovasculares)

En el análisis conjunto de los datos (11 ECAs, 19.261 pacientes) no mostró diferencias significativas respecto el número de pacientes con efectos indeseados graves de tipo cardiovascular: OR 1.08 (0.89 a 1.32); 4 más por 1000 (de 5 menos a 15 más). La confianza con estos resultados es moderada (ver tabla de resumen de resultados).

**Calidad moderada**

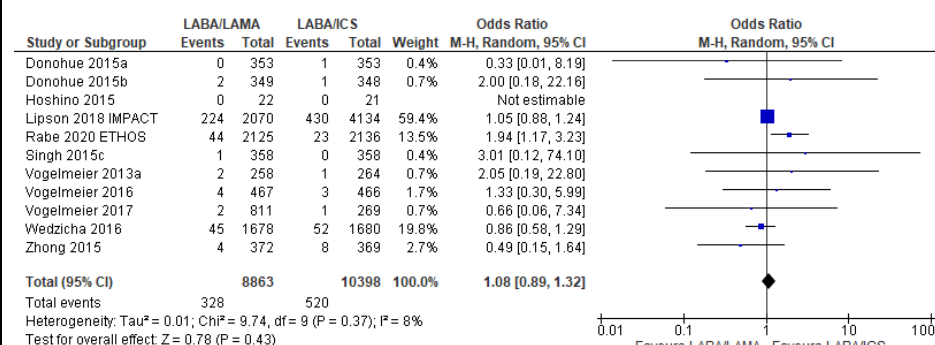

### Abandonos debidos a los eventos adversos

En el análisis conjunto de los datos (11 ECAs, 19.261 pacientes) no mostró diferencias respecto el número de pacientes que abandonaron el tratamiento debido a efectos indeseados: OR 1.02 (0.90 a 1.15); 1 más por 1000 (de 7 menos a 10 más). La confianza con estos resultados es moderada (ver tabla de resumen de resultados).

**Calidad moderada**

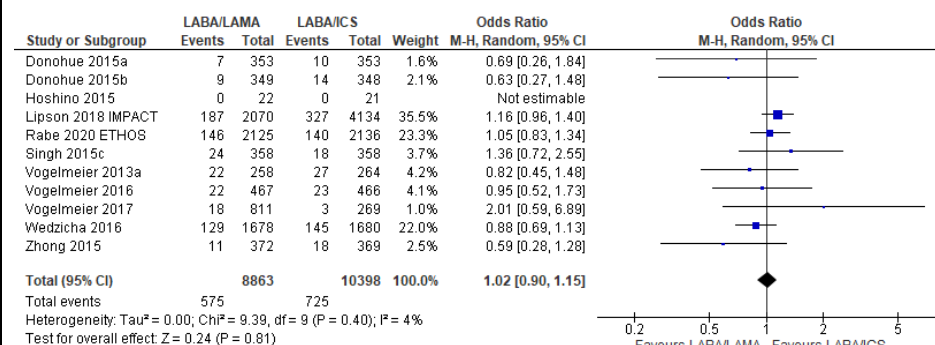

### Neumonía

En el análisis conjunto de los datos (10 ECAs, 19.218 pacientes) mostró una reducción significativa del número de pacientes con neumonía favorable a la doble broncodilatación: OR 0.61 (0.51 a 0.72); 17 menos por 1000 (de 22 a 12 menos). La confianza con estos resultados es alta.

**Calidad alta**

| Study or Subgroup                                                                                                           | LABA/LAMA |       | LABA/ICS |       | Weight | Odds Ratio          |               |  | Odds Ratio          |  |
|-----------------------------------------------------------------------------------------------------------------------------|-----------|-------|----------|-------|--------|---------------------|---------------|--|---------------------|--|
|                                                                                                                             | Events    | Total | Events   | Total |        | M-H, Random, 95% CI |               |  | M-H, Random, 95% CI |  |
| Donohue 2015a                                                                                                               | 1         | 353   | 4        | 353   | 0.6%   | 0.25                | [0.03, 2.23]  |  |                     |  |
| Donohue 2015b                                                                                                               | 2         | 349   | 4        | 348   | 1.0%   | 0.50                | [0.09, 2.72]  |  |                     |  |
| Lipson 2018 IMPACT                                                                                                          | 97        | 2070  | 292      | 4134  | 52.0%  | 0.65                | [0.51, 0.82]  |  |                     |  |
| Rabe 2020 ETHOS                                                                                                             | 61        | 2125  | 107      | 2136  | 28.2%  | 0.56                | [0.41, 0.77]  |  |                     |  |
| Singh 2015c                                                                                                                 | 0         | 358   | 1        | 358   | 0.3%   | 0.33                | [0.01, 8.19]  |  |                     |  |
| Vogelmeier 2013a                                                                                                            | 0         | 258   | 2        | 264   | 0.3%   | 0.20                | [0.01, 4.25]  |  |                     |  |
| Vogelmeier 2016                                                                                                             | 2         | 467   | 4        | 466   | 1.0%   | 0.50                | [0.09, 2.73]  |  |                     |  |
| Vogelmeier 2017                                                                                                             | 1         | 811   | 0        | 269   | 0.3%   | 1.00                | [0.04, 24.56] |  |                     |  |
| Wedzicha 2016                                                                                                               | 34        | 1678  | 54       | 1680  | 15.3%  | 0.62                | [0.40, 0.96]  |  |                     |  |
| Zhong 2015                                                                                                                  | 2         | 372   | 4        | 369   | 1.0%   | 0.49                | [0.09, 2.71]  |  |                     |  |
| Total (95% CI)                                                                                                              |           | 8841  |          | 10377 | 100.0% | 0.61                | [0.51, 0.72]  |  |                     |  |
| Total events                                                                                                                | 200       |       | 472      |       |        |                     |               |  |                     |  |
| Heterogeneity: Tau <sup>2</sup> = 0.00; Chi <sup>2</sup> = 2.06, df = 9 (P = 0.99); I <sup>2</sup> = 0%                     |           |       |          |       |        |                     |               |  |                     |  |
| Test for overall effect: Z = 5.76 (P < 0.00001)                                                                             |           |       |          |       |        |                     |               |  |                     |  |
|                                                                                                                             |           |       |          |       |        |                     |               |  |                     |  |
| <i>*Datos según población ITT del cuerpo de la publicación para el estudio ETHOS al ser la diferencia más conservadora.</i> |           |       |          |       |        |                     |               |  |                     |  |

|                                                                                                                                                                                                                                                                                                                                                                                                                       |
|-----------------------------------------------------------------------------------------------------------------------------------------------------------------------------------------------------------------------------------------------------------------------------------------------------------------------------------------------------------------------------------------------------------------------|
| <b>Calidad global de la evidencia</b>                                                                                                                                                                                                                                                                                                                                                                                 |
| El grupo elaborador de la guía consideró las exacerbaciones como desenlaces críticos para la toma de decisiones. Los otros desenlaces se consideraron importantes pero no críticos para la toma de decisiones.                                                                                                                                                                                                        |
| La confianza con los resultados de este desenlace es baja principalmente debido a la variabilidad de los resultados debido a las diferencias en los criterios de inclusión de los estudios. También debido a un posible sesgo de carácter indirecto, ya que la población incluida en los ensayos no estaba constituida por población sin tratamiento y GesEPOC establece esta recomendación como tratamiento inicial. |
| <b>Valores y preferencias</b>                                                                                                                                                                                                                                                                                                                                                                                         |
| No se realizó una búsqueda formal de la literatura.                                                                                                                                                                                                                                                                                                                                                                   |
| <b>Uso de recursos y costes</b>                                                                                                                                                                                                                                                                                                                                                                                       |
| No se realizó una búsqueda formal de la literatura.                                                                                                                                                                                                                                                                                                                                                                   |
| <b>Recomendación:</b>                                                                                                                                                                                                                                                                                                                                                                                                 |
| Se sugiere el tratamiento inicial con LABA/LAMA en un paciente agudizador no eosinofílico.                                                                                                                                                                                                                                                                                                                            |
| <b>Especificaciones:</b>                                                                                                                                                                                                                                                                                                                                                                                              |
| La comparación entre la eficacia de ambas alternativas en la prevención de agudizaciones no es concluyente, aunque la relación beneficio / riesgo parece favorecer al tratamiento LABA/LAMA en el perfil de pacientes que requieren tratamiento inicial.                                                                                                                                                              |

# Para el tratamiento inicial en un paciente agudizador no eosinofílico ¿Qué tratamiento es de elección LABA/LAMA o LABA/CI?

| Certainty assessment                                                                                                          |                    |                 |                    |                          |                    |                       | Nº de pacientes   |                   | Efecto                               |                                            | Certainty        | Importancia |
|-------------------------------------------------------------------------------------------------------------------------------|--------------------|-----------------|--------------------|--------------------------|--------------------|-----------------------|-------------------|-------------------|--------------------------------------|--------------------------------------------|------------------|-------------|
| Nº de estudios                                                                                                                | Diseño de estudio  | Riesgo de sesgo | Inconsistencia     | Evidencia indirecta      | Imprecisión        | Otras consideraciones | LABA/LAMA         | LABA/ICS          | Relativo (95% CI)                    | Absoluto (95% CI)                          |                  |             |
| Frecuencia de agudizaciones moderadas-graves                                                                                  |                    |                 |                    |                          |                    |                       |                   |                   |                                      |                                            |                  |             |
| 3                                                                                                                             | ensayos aleatorios | no es serio     | serio <sup>a</sup> | serio <sup>b</sup>       | no es serio        | ninguno               | 5855              | 7943              | Razón de tasas 1.03<br>(0.98 a 1.03) |                                            | ⊕⊕○○<br>BAJA     | CRITICA     |
| Frecuencia de exacerbaciones graves                                                                                           |                    |                 |                    |                          |                    |                       |                   |                   |                                      |                                            |                  |             |
| 3                                                                                                                             | ensayos aleatorios | no es serio     | serio <sup>a</sup> | serio <sup>b</sup>       | no es serio        | ninguno               | 5855              | 7943              | Razón de tasas 1.06<br>(0.95 a 1.19) |                                            | ⊕⊕○○<br>BAJA     | CRITICA     |
| Calidad de vida (respondedores) (seguimiento: rango 1 meses a 3 meses ; evaluado con : SGRQ - disminución de 4 puntos o más)  |                    |                 |                    |                          |                    |                       |                   |                   |                                      |                                            |                  |             |
| 4                                                                                                                             | ensayos aleatorios | no es serio     | no es serio        | no es serio              | serio <sup>c</sup> | ninguno               | 624/1197 (52.1%)  | 603/1200 (50.2%)  | OR 1.08<br>(0.92 a 1.27)             | 19 más por 1000<br>(de 21 menos a 59 más ) | ⊕⊕⊕○<br>MODERADO | IMPORTANTE  |
| Calidad de vida (respondedores) (seguimiento: rango 6 meses a 12 meses ; evaluado con : SGRQ - disminución de 4 puntos o más) |                    |                 |                    |                          |                    |                       |                   |                   |                                      |                                            |                  |             |
| 4                                                                                                                             | ensayos aleatorios | no es serio     | no es serio        | no es serio              | serio <sup>c</sup> | ninguno               | 2494/5979 (41.7%) | 3141/8065 (38.9%) | OR 1.07<br>(0.91 a 1.25)             | 16 más por 1000<br>(de 22 menos a 54 más ) | ⊕⊕⊕○<br>MODERADO | IMPORTANTE  |
| Calidad de vida (cambio desde el inicio) (seguimiento: media 3 meses ; evaluado con : SGRQ)                                   |                    |                 |                    |                          |                    |                       |                   |                   |                                      |                                            |                  |             |
| 6                                                                                                                             | ensayos aleatorios | no es serio     | no es serio        | no es serio <sup>d</sup> | no es serio        | ninguno               | 3169              | 3173              | -                                    | MD 0.49 menos<br>(1.41 menos a 0.43 más )  | ⊕⊕⊕⊕<br>ALTA     | IMPORTANTE  |
| Calidad de vida (cambio desde el inicio) (seguimiento: media 6 meses ; evaluado con : SGRQ)                                   |                    |                 |                    |                          |                    |                       |                   |                   |                                      |                                            |                  |             |
| 3                                                                                                                             | ensayos aleatorios | no es serio     | no es serio        | no es serio <sup>d</sup> | no es serio        | ninguno               | 2187              | 2173              | -                                    | MD 1.18 menos<br>(2.2 menos a 0.16 menos ) | ⊕⊕⊕⊕<br>ALTA     | IMPORTANTE  |
| Calidad de vida (cambio desde el inicio) (seguimiento: media 12 meses ; evaluado con : SGRQ)                                  |                    |                 |                    |                          |                    |                       |                   |                   |                                      |                                            |                  |             |
| 3                                                                                                                             | ensayos aleatorios | no es serio     | no es serio        | no es serio <sup>d</sup> | no es serio        | ninguno               | 4634              | 6250              | -                                    | MD 0.22 menos<br>(1.09 menos a 0.64 más )  | ⊕⊕⊕⊕<br>ALTA     | IMPORTANTE  |
| Disnea (seguimiento: media 3 meses ; evaluado con : Índice transicional de disnea - TDI) IMPORTANTE                           |                    |                 |                    |                          |                    |                       |                   |                   |                                      |                                            |                  |             |
| 7                                                                                                                             | ensayos aleatorios | no es serio     | no es serio        | no es serio <sup>d</sup> | no es serio        | ninguno               | 2583              | 2043              | -                                    | MD 0.41 más<br>(0.09 más a 0.73 más )      | ⊕⊕⊕⊕<br>ALTA     | IMPORTANTE  |
| Disnea (seguimiento: media 6 meses ; evaluado con : Índice transicional de disnea - TDI)                                      |                    |                 |                    |                          |                    |                       |                   |                   |                                      |                                            |                  |             |
| 4                                                                                                                             | ensayos aleatorios | no es serio     | no es serio        | no es serio <sup>d</sup> | no es serio        | ninguno               | 2883              | 2901              | -                                    | MD 0.06 menos<br>(0.21 menos a 0.09 más )  | ⊕⊕⊕⊕<br>ALTA     | IMPORTANTE  |

| Certainty assessment                                                                                 |                    |                 |                |                          |                    |                       | Nº de pacientes   |                    | Efecto                   |                                                | Certainty        | Importancia |
|------------------------------------------------------------------------------------------------------|--------------------|-----------------|----------------|--------------------------|--------------------|-----------------------|-------------------|--------------------|--------------------------|------------------------------------------------|------------------|-------------|
| Nº de estudios                                                                                       | Diseño de estudio  | Riesgo de sesgo | Inconsistencia | Evidencia indirecta      | Imprecisión        | Otras consideraciones | LABA/LAMA         | LABA/ICS           | Relativo (95% CI)        | Absoluto (95% CI)                              |                  |             |
| Función pulmonar (seguimiento: media 3 meses ; evaluado con : FEV1 - cambio respecto al valor basal) |                    |                 |                |                          |                    |                       |                   |                    |                          |                                                |                  |             |
| 8                                                                                                    | ensayos aleatorios | no es serio     | no es serio    | no es serio <sup>d</sup> | no es serio        | ninguno               | 3476              | 3462               | -                        | MD 0.07 más<br>(0.04 más a 0.1 más )           | ⊕⊕⊕⊕<br>ALTA     | IMPORTANTE  |
| Función pulmonar (seguimiento: media 6 meses ; evaluado con : FEV1 - cambio respecto al valor basal) |                    |                 |                |                          |                    |                       |                   |                    |                          |                                                |                  |             |
| 4                                                                                                    | ensayos aleatorios | no es serio     | no es serio    | no es serio <sup>d</sup> | no es serio        | ninguno               | 2649              | 2643               | -                        | MD 0.09 más<br>(0.07 más a 0.11 más )          | ⊕⊕⊕⊕<br>ALTA     | IMPORTANTE  |
| Mortalidad                                                                                           |                    |                 |                |                          |                    |                       |                   |                    |                          |                                                |                  |             |
| 12                                                                                                   | ensayos aleatorios | no es serio     | no es serio    | no es serio <sup>d</sup> | serio <sup>e</sup> | ninguno               | 119/9106 (1.3%)   | 113/10652 (1.1%)   | OR 1.37<br>(1.05 a 1.78) | 4 más por 1000<br>(de 1 más a 8 más )          | ⊕⊕⊕○<br>MODERADO | IMPORTANTE  |
| Efectos indeseados serios                                                                            |                    |                 |                |                          |                    |                       |                   |                    |                          |                                                |                  |             |
| 12                                                                                                   | ensayos aleatorios | no es serio     | no es serio    | no es serio <sup>d</sup> | serio <sup>c</sup> | ninguno               | 1334/9111 (14.6%) | 1746/10648 (16.4%) | OR 0.99<br>(0.88 a 1.11) | 1 menos por 1000<br>(de 17 menos a 15 más )    | ⊕⊕⊕○<br>MODERADO | IMPORTANTE  |
| Efectos indeseados serios relacionados con EPOC                                                      |                    |                 |                |                          |                    |                       |                   |                    |                          |                                                |                  |             |
| 12                                                                                                   | ensayos aleatorios | no es serio     | no es serio    | no es serio <sup>d</sup> | serio <sup>c</sup> | ninguno               | 704/9111 (7.7%)   | 938/10748 (8.7%)   | OR 0.96<br>(0.76 a 1.21) | 3 menos por 1000<br>(de 20 menos a 16 más )    | ⊕⊕⊕○<br>MODERADO | IMPORTANTE  |
| Efectos indeseados serios cardiovasculares                                                           |                    |                 |                |                          |                    |                       |                   |                    |                          |                                                |                  |             |
| 11                                                                                                   | ensayos aleatorios | no es serio     | no es serio    | no es serio <sup>d</sup> | serio <sup>c</sup> | ninguno               | 328/8863 (3.7%)   | 520/10398 (5.0%)   | OR 1.08<br>(0.89 a 1.32) | 4 más por 1000<br>(de 5 menos a 15 más )       | ⊕⊕⊕○<br>MODERADO | IMPORTANTE  |
| Abandono del tratamiento debido a efectos indeseados                                                 |                    |                 |                |                          |                    |                       |                   |                    |                          |                                                |                  |             |
| 11                                                                                                   | ensayos aleatorios | no es serio     | no es serio    | no es serio <sup>d</sup> | serio <sup>c</sup> | ninguno               | 575/8863 (6.5%)   | 725/10398 (7.0%)   | OR 1.02<br>(0.90 a 1.15) | 1 más por 1000<br>(de 7 menos a 10 más )       | ⊕⊕⊕○<br>MODERADO | IMPORTANTE  |
| Neumonía                                                                                             |                    |                 |                |                          |                    |                       |                   |                    |                          |                                                |                  |             |
| 10                                                                                                   | ensayos aleatorios | no es serio     | no es serio    | no es serio <sup>d</sup> | no es serio        | ninguno               | 200/8841 (2.3%)   | 472/10377 (4.5%)   | OR 0.61<br>(0.51 a 0.72) | 17 menos por 1000<br>(de 22 menos a 12 menos ) | ⊕⊕⊕⊕<br>ALTA     | IMPORTANTE  |



## Explicaciones

- a. Heterogeneidad marcada de los resultados entre los distintos estudios
- b. Ninguno de los tres estudios evaluó específicamente la doble broncodilatación frente a tratamiento combinado como tratamiento inicial en un paciente agudizador no eosinofílico
- c. IC 95% del efecto relativo amplio, incluye una reducción o un incremento relevante de los efectos absolutos.
- d. Aunque ninguno de los estudios incluyó específicamente la población diana, es poco probable que este aspecto tuviera un impacto relevante en los resultados de estos desenlaces
- e. El IC 95% de los efectos absolutos incluye una diferencia relevante i el no efecto.

## Referencias

### Revisión sistemática:

1. Oba Y, Keeney E, Ghathehorde N, Dias S. Dual combination therapy versus long-acting bronchodilators alone for chronic obstructive pulmonary disease (COPD): a systematic review and network meta-analysis. *Cochrane Database Syst Rev*. 2018 Dec 3;12(12):CD012620.

### Ensayos clínicos aleatorizados:

1. Donohue JF, Worsley S, Zhu CQ, Hardaker L, Church A. Improvements in lung function with umeclidinium/vilanterol versus fluticasone propionate/salmeterol in patients with moderate-to-severe COPD and infrequent exacerbations. *Respiratory Medicine* 2015a;109(7):870–81.
2. Donohue JF, Worsley S, Zhu CQ, Hardaker L, Church A. Improvements in lung function with umeclidinium/vilanterol versus fluticasone propionate/salmeterol in patients with moderate-to-severe COPD and infrequent exacerbations. *Respiratory Medicine* 2015b;109(7):870–81.
3. Frith PA, Ashmawi S, Krishnamurthy S, Gurgun A, Hristoskova S, Pilipovic V, et al. Efficacy and safety of the direct switch to indacaterol/glycopyrronium from salmeterol/fluticasone in non-frequently exacerbating COPD patients: The FLASH randomized controlled trial. *Respirology*. 2018;23(12):1152-9.
4. Hoshino M, Ohtawa J, Akitsu K. Comparison of airway dimensions with once daily tiotropium plus indacaterol versus twice daily Advair in chronic obstructive pulmonary disease. *Pulmonary Pharmacology & Therapeutics* 2015;30:128–33.
5. Singh D, Worsley S, Zhu CQ, Hardaker L, Church A. Umeclidinium/vilanterol versus fluticasone propionate/salmeterol in COPD: a randomised trial. *BMC Pulmonary Medicine* 2015c;15:91.
6. Vogelmeier CF, Bateman ED, Pallante J, Alagappan VK, D'Andrea P, Chen H, et al. Efficacy and safety of once-daily QVA149 compared with twice-daily salmeterol-fluticasone in patients with chronic obstructive pulmonary disease (ILLUMINATE): a randomised, double-blind, parallel group study. *Lancet Respiratory Medicine* 2013a;1(1):51–60.
7. Vogelmeier C, Paggiaro PL, Dorca J, Sliwinski P, Mallet M, Kirsten AM, et al. Efficacy and safety of aclidinium/formoterol versus salmeterol/fluticasone: a phase 3 COPD study. *European Respiratory Journal* 2016;48(4):1030–39.
8. Vogelmeier CF, Gaga M, Aalamian-Mattheis M, Greulich T, Marin JM5, Castellani W, et al. Efficacy and safety of direct switch to indacaterol/glycopyrronium in patients with moderate COPD: the CRYSTAL open-label randomised trial. *Respiratory Research* 2017;18(1):140.
9. Wedzicha JA, Banerji D, Chapman KR, Vestbo J, Roche N, Ayers RT, et al. Indacaterol-glycopyrronium versus salmeterol-fluticasone for COPD. *New England Journal of Medicine* 2016;374(23):2222–34.
10. Zhong N, Wang C, Zhou X, Zhang N, Humphries M, Wang L, et al. LANTERN: a randomized study of QVA149 versus salmeterol/fluticasone combination in patients with COPD. *International Journal of Chronic Obstructive Pulmonary Disease* 2015;10:1015–26.

### Pregunta 3.

|                                                                                                                                                                                                                                                                                                                                                                                                                                                                                                                                                                                                                                                                                                                                                                                                                                                                                                                                                                                                                                                                                                                                                                                                                                                                                                                                                                                                                                                                                                                                                                                                                                                                                                                                                                                                                                     |                                |
|-------------------------------------------------------------------------------------------------------------------------------------------------------------------------------------------------------------------------------------------------------------------------------------------------------------------------------------------------------------------------------------------------------------------------------------------------------------------------------------------------------------------------------------------------------------------------------------------------------------------------------------------------------------------------------------------------------------------------------------------------------------------------------------------------------------------------------------------------------------------------------------------------------------------------------------------------------------------------------------------------------------------------------------------------------------------------------------------------------------------------------------------------------------------------------------------------------------------------------------------------------------------------------------------------------------------------------------------------------------------------------------------------------------------------------------------------------------------------------------------------------------------------------------------------------------------------------------------------------------------------------------------------------------------------------------------------------------------------------------------------------------------------------------------------------------------------------------|--------------------------------|
| <p><b>Pregunta para responder:</b><br/> <b>En pacientes con agudizaciones a pesar de un tratamiento con LABA/LAMA ¿Es eficaz la triple terapia LABA/LAMA/CI?</b></p>                                                                                                                                                                                                                                                                                                                                                                                                                                                                                                                                                                                                                                                                                                                                                                                                                                                                                                                                                                                                                                                                                                                                                                                                                                                                                                                                                                                                                                                                                                                                                                                                                                                                |                                |
| <p>Se identificó una revisión sistemática (RS) reciente que evaluó directamente si la triple terapia es superior a la doble broncodilatación en los pacientes con EPOC. Para este informe se incluyeron sólo los tres estudios en los que el tratamiento se administró mediante dispositivo único: estudios KRONOS (Fergusson 2018), IMPACT (Lipson 2018) y TRIBUTE (Papi 2018). Posterior a la publicación de esta revisión, se identificó un gran ensayo ETHOS (Rabe 2020).</p> <p>Se identificaron dos publicaciones derivadas del estudio IMPACT (Lipson 2018), una evaluación económica reciente sobre el uso de fluroato de fluticasona (FF)/umeclidinio (UMEC)/vilanterol (VI) frente a FF/VI o UMEC/VI (Ismaila 2019) y la segunda sobre los efectos cardiovasculares de la administración de fluroato de fluticasona (FF)/umeclidinio (UMEC)/vilanterol (VI) frente a FF/VI o UMEC/VI (Day 2020)</p>                                                                                                                                                                                                                                                                                                                                                                                                                                                                                                                                                                                                                                                                                                                                                                                                                                                                                                                       |                                |
| <p><b>Revisión sistemática:</b></p> <ol style="list-style-type: none"> <li>Mammen MJ, Lloyd DR, Kumar S, Ahmed AS, Pai V, Kunadharaju R, Gupta S, Nici L, Aaron SD, Alexander PE. Triple Therapy versus Dual or Monotherapy with Long-acting Bronchodilators for COPD: A Systematic Review and Meta-Analysis. Ann Am Thorac Soc. 2020 Jul 21. doi: 10.1513/AnnalsATS.202001-023OC.</li> </ol>                                                                                                                                                                                                                                                                                                                                                                                                                                                                                                                                                                                                                                                                                                                                                                                                                                                                                                                                                                                                                                                                                                                                                                                                                                                                                                                                                                                                                                       |                                |
| <p><b>Ensayos clínicos aleatorizados:</b></p> <ol style="list-style-type: none"> <li>Fergusson GT, Rabe KF, Martinez FJ, Fabbri LM, Wang C, Ichinose M, et al. Triple therapy with budesonide/glycopyrrolate/formoterol fumarate with co-suspension delivery technology versus dual therapies in chronic obstructive pulmonary disease (KRONOS): a double-blind, parallel-group, multicentre, phase 3 randomised controlled trial. The lancet Respiratory medicine. 2018;6(10):747-58.</li> <li>Lipson DA, Barnhart F, Brealey N, Brooks J, Criner GJ, Day NC, et al. Once-Daily Single-Inhaler Triple versus Dual Therapy in Patients with COPD. N Engl J Med. 2018;378(18):1671-80.</li> <li>Papi A, Vestbo J, Fabbri L, Corradi M, Prunier H, Cohuet G, et al. Extrafine inhaled triple therapy versus dual bronchodilator therapy in chronic obstructive pulmonary disease (TRIBUTE): a double-blind, parallel group, randomised controlled trial. Lancet. 2018;391(10125):1076-84.</li> <li>Rabe KF, Martinez FJ, Ferguson GT, Wang C, Singh D, Wedzicha JA, Trivedi R, St Rose E, Ballal S, McLaren J, Darken P, Aurivillius M, Reisner C, Dorinsky P; ETHOS Investigators. Triple Inhaled Therapy at Two Glucocorticoid Doses in Moderate-to-Very-Severe COPD. N Engl J Med. 2020 Jul 2;383(1):35-48. doi: 10.1056/NEJMoa1916046. Epub 2020 Jun 24. PMID: 32579807.</li> <li>Day NC, Kumar S, Criner G, Dransfield M, Halpin DMG, Han MK, Jones CE, Kaisermann MC, Kilbride S, Lange P, Lomas DA, Martin N, Martinez FJ, Singh D, Wise R, Lipson DA. Single-inhaler triple therapy fluticasone furoate/umeclidinium/vilanterol versus fluticasone furoate/vilanterol and umeclidinium/vilanterol in patients with COPD: results on cardiovascular safety from the IMPACT trial. Respir Res. 2020 Jun 5;21(1):139.</li> </ol> |                                |
| <p><b>Evaluación económica:</b></p> <ol style="list-style-type: none"> <li>Ismaila AS, Risebrough N, Schroeder M, Shah D, Martin A, Goodall EC, et al. Cost-Effectiveness Of Once-Daily Single-Inhaler Triple Therapy In COPD: The IMPACT Trial. Int J Chron Obstruct Pulmon Dis. 2019;14:2681-95.</li> </ol>                                                                                                                                                                                                                                                                                                                                                                                                                                                                                                                                                                                                                                                                                                                                                                                                                                                                                                                                                                                                                                                                                                                                                                                                                                                                                                                                                                                                                                                                                                                       |                                |
| <p><b>Triple terapia (LABA/LAMA/ICS) vs doble terapia (LABA/LAMA)</b></p>                                                                                                                                                                                                                                                                                                                                                                                                                                                                                                                                                                                                                                                                                                                                                                                                                                                                                                                                                                                                                                                                                                                                                                                                                                                                                                                                                                                                                                                                                                                                                                                                                                                                                                                                                           |                                |
| <p><b>Frecuencia de exacerbaciones/agudizaciones</b></p>                                                                                                                                                                                                                                                                                                                                                                                                                                                                                                                                                                                                                                                                                                                                                                                                                                                                                                                                                                                                                                                                                                                                                                                                                                                                                                                                                                                                                                                                                                                                                                                                                                                                                                                                                                            |                                |
| <p>En el análisis conjunto de los datos (4 ECAs, 13.251 pacientes) mostró una reducción significativa de la frecuencia de las exacerbaciones favorable a la triple terapia: rate ratio 0.73 (IC95% 0.64 a 0.83). La confianza con los resultados es moderada (ver tabla de resumen de resultados).</p>                                                                                                                                                                                                                                                                                                                                                                                                                                                                                                                                                                                                                                                                                                                                                                                                                                                                                                                                                                                                                                                                                                                                                                                                                                                                                                                                                                                                                                                                                                                              | <p><b>Calidad moderada</b></p> |

| <table><tr><th>Study or Subgroup</th><th>log[Rate Ratio]</th><th>SE</th><th>Triple therapy<br/>Total</th><th>Dual LABA/LAMA therapy<br/>Total</th><th>Weight</th><th>Rate Ratio<br/>IV, Random, 95% CI</th></tr><tr><td>Fergusson 2018 KRONOS</td><td>-0.734</td><td>0.1328</td><td>639</td><td>625</td><td>14.8%</td><td>0.48 [0.37, 0.62]</td></tr><tr><td>Lipson 2018 IMPACT</td><td>-0.2877</td><td>0.0352</td><td>4145</td><td>2069</td><td>32.2%</td><td>0.75 [0.70, 0.80]</td></tr><tr><td>Papi 2018 TRIBUTE</td><td>-0.1649</td><td>0.0814</td><td>764</td><td>768</td><td>23.3%</td><td>0.85 [0.72, 0.99]</td></tr><tr><td>Rabe 2020 ETHOS</td><td>-0.2744</td><td>0.0493</td><td>2121</td><td>2120</td><td>29.7%</td><td>0.76 [0.69, 0.84]</td></tr><tr><td>Total (95% CI)</td><td></td><td></td><td>7669</td><td>5582</td><td>100.0%</td><td>0.73 [0.64, 0.83]</td></tr></table> <p>Heterogeneity: Tau<sup>2</sup> = 0.01; Chi<sup>2</sup> = 13.64, df = 3 (P = 0.003); I<sup>2</sup> = 78%<br/>Test for overall effect: Z = 4.78 (P &lt; 0.00001)</p> 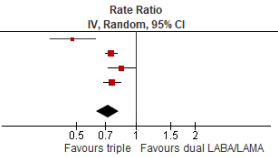 |                 |        |                         |                                 |        |                                  | Study or Subgroup | log[Rate Ratio] | SE | Triple therapy<br>Total | Dual LABA/LAMA therapy<br>Total | Weight | Rate Ratio<br>IV, Random, 95% CI | Fergusson 2018 KRONOS | -0.734 | 0.1328 | 639 | 625 | 14.8% | 0.48 [0.37, 0.62] | Lipson 2018 IMPACT | -0.2877 | 0.0352 | 4145 | 2069 | 32.2% | 0.75 [0.70, 0.80] | Papi 2018 TRIBUTE | -0.1649 | 0.0814 | 764 | 768 | 23.3% | 0.85 [0.72, 0.99] | Rabe 2020 ETHOS | -0.2744 | 0.0493 | 2121 | 2120 | 29.7% | 0.76 [0.69, 0.84] | Total (95% CI) |  |  | 7669 | 5582 | 100.0% | 0.73 [0.64, 0.83] | <p>Rate Ratio<br/>IV, Random, 95% CI</p> |  |
|------------------------------------------------------------------------------------------------------------------------------------------------------------------------------------------------------------------------------------------------------------------------------------------------------------------------------------------------------------------------------------------------------------------------------------------------------------------------------------------------------------------------------------------------------------------------------------------------------------------------------------------------------------------------------------------------------------------------------------------------------------------------------------------------------------------------------------------------------------------------------------------------------------------------------------------------------------------------------------------------------------------------------------------------------------------------------------------------------------------------------------------------------|-----------------|--------|-------------------------|---------------------------------|--------|----------------------------------|-------------------|-----------------|----|-------------------------|---------------------------------|--------|----------------------------------|-----------------------|--------|--------|-----|-----|-------|-------------------|--------------------|---------|--------|------|------|-------|-------------------|-------------------|---------|--------|-----|-----|-------|-------------------|-----------------|---------|--------|------|------|-------|-------------------|----------------|--|--|------|------|--------|-------------------|------------------------------------------|--|
| Study or Subgroup                                                                                                                                                                                                                                                                                                                                                                                                                                                                                                                                                                                                                                                                                                                                                                                                                                                                                                                                                                                                                                                                                                                                    | log[Rate Ratio] | SE     | Triple therapy<br>Total | Dual LABA/LAMA therapy<br>Total | Weight | Rate Ratio<br>IV, Random, 95% CI |                   |                 |    |                         |                                 |        |                                  |                       |        |        |     |     |       |                   |                    |         |        |      |      |       |                   |                   |         |        |     |     |       |                   |                 |         |        |      |      |       |                   |                |  |  |      |      |        |                   |                                          |  |
| Fergusson 2018 KRONOS                                                                                                                                                                                                                                                                                                                                                                                                                                                                                                                                                                                                                                                                                                                                                                                                                                                                                                                                                                                                                                                                                                                                | -0.734          | 0.1328 | 639                     | 625                             | 14.8%  | 0.48 [0.37, 0.62]                |                   |                 |    |                         |                                 |        |                                  |                       |        |        |     |     |       |                   |                    |         |        |      |      |       |                   |                   |         |        |     |     |       |                   |                 |         |        |      |      |       |                   |                |  |  |      |      |        |                   |                                          |  |
| Lipson 2018 IMPACT                                                                                                                                                                                                                                                                                                                                                                                                                                                                                                                                                                                                                                                                                                                                                                                                                                                                                                                                                                                                                                                                                                                                   | -0.2877         | 0.0352 | 4145                    | 2069                            | 32.2%  | 0.75 [0.70, 0.80]                |                   |                 |    |                         |                                 |        |                                  |                       |        |        |     |     |       |                   |                    |         |        |      |      |       |                   |                   |         |        |     |     |       |                   |                 |         |        |      |      |       |                   |                |  |  |      |      |        |                   |                                          |  |
| Papi 2018 TRIBUTE                                                                                                                                                                                                                                                                                                                                                                                                                                                                                                                                                                                                                                                                                                                                                                                                                                                                                                                                                                                                                                                                                                                                    | -0.1649         | 0.0814 | 764                     | 768                             | 23.3%  | 0.85 [0.72, 0.99]                |                   |                 |    |                         |                                 |        |                                  |                       |        |        |     |     |       |                   |                    |         |        |      |      |       |                   |                   |         |        |     |     |       |                   |                 |         |        |      |      |       |                   |                |  |  |      |      |        |                   |                                          |  |
| Rabe 2020 ETHOS                                                                                                                                                                                                                                                                                                                                                                                                                                                                                                                                                                                                                                                                                                                                                                                                                                                                                                                                                                                                                                                                                                                                      | -0.2744         | 0.0493 | 2121                    | 2120                            | 29.7%  | 0.76 [0.69, 0.84]                |                   |                 |    |                         |                                 |        |                                  |                       |        |        |     |     |       |                   |                    |         |        |      |      |       |                   |                   |         |        |     |     |       |                   |                 |         |        |      |      |       |                   |                |  |  |      |      |        |                   |                                          |  |
| Total (95% CI)                                                                                                                                                                                                                                                                                                                                                                                                                                                                                                                                                                                                                                                                                                                                                                                                                                                                                                                                                                                                                                                                                                                                       |                 |        | 7669                    | 5582                            | 100.0% | 0.73 [0.64, 0.83]                |                   |                 |    |                         |                                 |        |                                  |                       |        |        |     |     |       |                   |                    |         |        |      |      |       |                   |                   |         |        |     |     |       |                   |                 |         |        |      |      |       |                   |                |  |  |      |      |        |                   |                                          |  |

*\*El estudio ETHOS se incluyeron los resultados del grupo que recibió la dosis inferior de corticoesteroides (160 micrg de budesonida) al ser la diferencia más conservadora y con escasa diferencia respecto a la dosis superior*

| **ANÁLISIS DE SUBGRUPOS - Frecuencia de exacerbaciones/agudizaciones** | | | | | | | | |
| Se ha analizado los resultados de los estudios según el número de eosinófilos basales y por frecuencia de exacerbaciones en el momento de la inclusión en el estudio. | | | | | | | **Calidad moderada** | |
| **Eosinófilos basales:**  Un total de 3 ECA aportaron resultados de frecuencia de exacerbaciones según el número o concentración de eosinófilos en el momento de la inclusión en el estudio. Se han realizado dos subgrupos según el nivel más elevado y bajo disponible en los resultados.  Los puntos de corte fueron:  Lipson 2018 - IMPACT: 90 cel/mm<sup>3</sup> vs 310 cel/mm<sup>3</sup> Papi 2018 - TRIBUTE: > 2% vs <2% Rabe 2020 - ETHOS: >150 cel/mm<sup>3</sup> vs <150 cel/mm<sup>3</sup>  En el análisis conjunto de los datos de estos 3 ECA mostró una reducción significativa de la frecuencia de las exacerbaciones favorable a la triple terapia para el subgrupo de eosinófilos bajos: rate ratio 0.89 (IC95% 0.81 a 0.99). El intervalo de confianza no excluye la irrelevancia de las diferencias observadas en este subgrupo.  Para el subgrupo de eosinófilos más elevados estos mismos tres ECA mostraron una reducción significativa de la frecuencia de las exacerbaciones favorable a la triple terapia: rate ratio 0.67 (IC95% 0.56 a 0.80).  La calidad de la evidencia es moderada (ver tabla de resumen de resultados). | | | | | | | | |
| | Study or Subgroup                   | log[Rate Ratio] | SE     | Weight | Rate Ratio<br>IV, Random, 95% CI | |-------------------------------------|-----------------|--------|--------|----------------------------------| | <b>1.9.1 Lower eosinophil count</b> |                 |        |        |                                  | | Lipson 2018 IMPACT                  | -0.1278         | 0.0884 | 35.6%  | 0.88 [0.74, 1.05]                | | Papi 2018 TRIBUTE                   | -0.0587         | 0.1441 | 13.4%  | 0.94 [0.71, 1.25]                | | Rabe 2020 ETHOS                     | -0.1165         | 0.0739 | 51.0%  | 0.89 [0.77, 1.03]                | | Subtotal (95% CI)                   |                 |        | 100.0% | 0.89 [0.81, 0.99]                |   Heterogeneity: Tau<sup>2</sup> = 0.00; Chi<sup>2</sup> = 0.17, df = 2 (P = 0.92); I<sup>2</sup> = 0% Test for overall effect: Z = 2.14 (P = 0.03) | | | | | | |  | |
| | Study or Subgroup                    | log[Rate Ratio] | SE     | Weight | Rate Ratio<br>IV, Random, 95% CI | |--------------------------------------|-----------------|--------|--------|----------------------------------| | <b>1.9.2 Higher eosinophil count</b> |                 |        |        |                                  | | Lipson 2018 IMPACT                   | -0.5798         | 0.0894 | 31.6%  | 0.56 [0.47, 0.67]                | | Papi 2018 TRIBUTE                    | -0.2157         | 0.0989 | 29.5%  | 0.81 [0.66, 0.98]                | | Rabe 2020 ETHOS                      | -0.4005         | 0.0563 | 38.9%  | 0.67 [0.60, 0.75]                | | Subtotal (95% CI)                    |                 |        | 100.0% | 0.67 [0.56, 0.80]                |   Heterogeneity: Tau<sup>2</sup> = 0.02; Chi<sup>2</sup> = 7.49, df = 2 (P = 0.02); I<sup>2</sup> = 73% Test for overall effect: Z = 4.48 (P < 0.00001) | | | | | | |  | |
| Test for subgroup differences: Chi<sup>2</sup> = 7.72, df = 1 (P = 0.005), I<sup>2</sup> = 87.0% | | | | | | |  | |

Al estratificar el análisis por frecuencia de agudizaciones, los resultados muestran una reducción significativa y consistente en los pacientes con exacerbaciones frecuentes (2 o más en el año previo) favorable a la terapia triple: RR 0.72 (IC95% 0.67 a 0.78).

En el subgrupo de pacientes con máximo una exacerbación en el año previo la reducción también fue significativa aunque los resultados fueron

heterogéneos. El estudio de Fergusson 2018 (KRONOS) se incluyó en este subgrupo dado que el 93% de los pacientes cumplían este criterio aunque la publicación no aporta datos sobre los subgrupos.

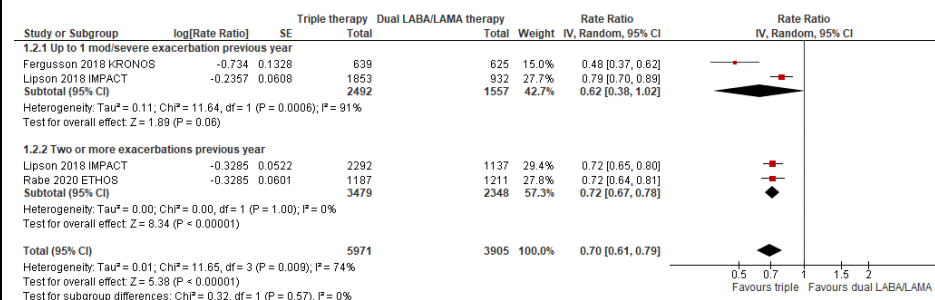

## Mortalidad

En el análisis conjunto de los datos (4 ECAs, 15.395 pacientes) mostró una reducción significativa favorable a la triple terapia: RR 0.70 (0.55 a 0.90); 6 menos por 1000 (de 9 a 2 menos). La confianza con los resultados es moderada (ver tabla de resumen de resultados).

**Calidad moderada**

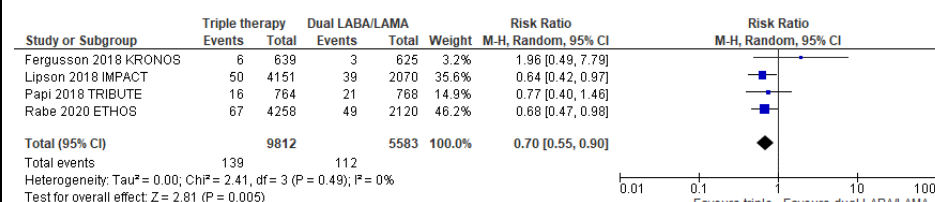

\* Para el estudio ETHOS los resultados provienen de la población ITT disponibles en el cuerpo de la publicación al ser la diferencia más conservadora. Los resultados disponibles de esta población en los suplementos son ligeramente diferentes.

## Calidad de vida

En el análisis conjunto de los datos (2 ECAs, 9239 pacientes) mostró una disminución (mejoría) en la puntuación del cuestionario de calidad de vida (SGRQ) en el grupo que recibió triple terapia, aunque el tamaño del efecto no clínicamente relevante: MD 1.53 puntos menos; IC95% 2.17 a 0.90 menos. La confianza con los resultados es alta (ver tabla de resumen de resultados).

**Calidad alta**

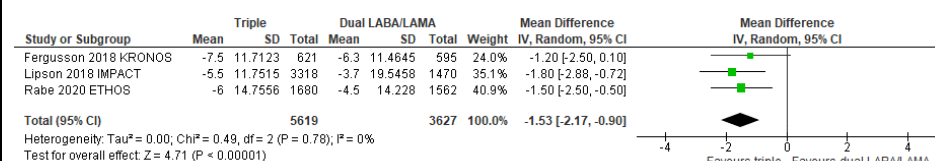

\*El estudio ETHOS se incluyeron los resultados del grupo que recibió la dosis inferior de corticosteroides (160 micrg de budesonida) al ser la diferencia más conservadora y con escasa diferencia respecto a la dosis superior

## Disnea

En el análisis conjunto de los datos (2 ECAs, 5197 pacientes) mostró una diferencia significativa en la puntuación de disnea (medida con la escala TDI), aunque el tamaño del efecto no clínicamente relevante: MD 0.31 puntos más; IC95% 0.10 a 0.43 más. La confianza con los resultados es alta (ver tabla de resumen de resultados).

**Calidad alta**

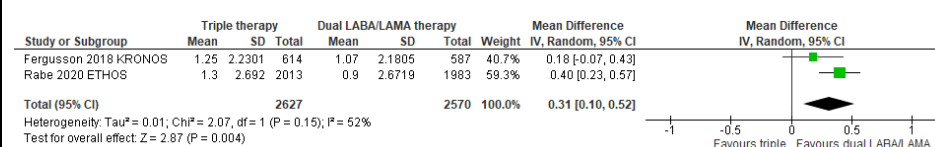

## Efectos indeseados

En el análisis conjunto de los datos (4 ECAs, 15.410 pacientes) no mostró diferencias significativas: RR 1.01 (0.97 a 1.05); 6 más por 1000 (de 18 menos a 30 más).

La confianza con los resultados es alta (ver tabla de resumen de resultados).

Aunque el análisis muestra una heterogeneidad relevante, ésta proviene de los dos estudios de tamaño relativamente pequeño. Los estudios que aportan la mayoría de los pacientes y eventos no muestran diferencias entre los dos grupos. Los efectos absolutos muestran un efecto que probablemente no es clínicamente relevante al tratarse de efectos indeseados de cualquier gravedad.

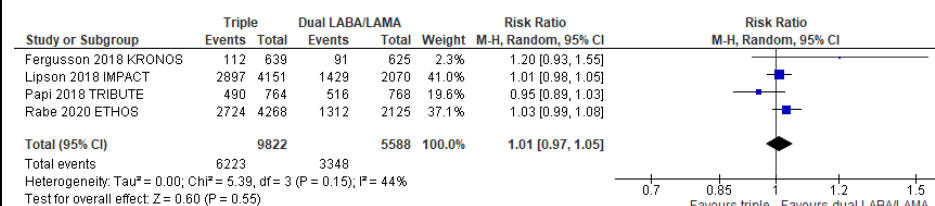

**Calidad alta**

### **Incidencia de neumonía**

En el análisis conjunto de los datos (4 ECAs, 15.410 pacientes) mostró un aumento significativo de las neumonías en el grupo que recibió triple terapia (incluyendo corticoesteroides inhalados): RR 1.50 (1.27 a 1.76); 17 más por 1000 (de 9 a 27 más).

La confianza con los resultados es alta (ver tabla de resumen de resultados).

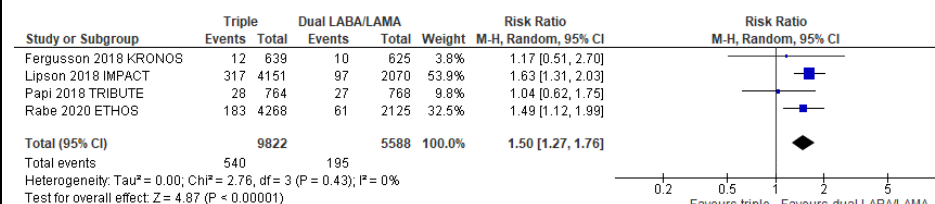

*\*Datos según población ITT del cuerpo de la publicación para el estudio ETHOS al ser la diferencia más conservadora.*

**Calidad alta**

### **Eventos cardiovasculares adversos de interés especial durante el tratamiento (CVAESI)**

Un estudio (Day 2020) no mostró diferencias significativas entre el tratamiento con FF/UMEC/VI frente a FF/VI o UMEC/VI en eventos cardiovasculares adversos de interés especial durante el tratamiento (CVAESI): HR 0.98 (0.85 a 1.11); 2 menos por 1000 (de 15 menos a 11 más) y HR: 0.92 (0.78 a 1.08); 8 menos por 1000 (de 23 menos a 8 más), respectivamente. Tampoco no mostró diferencias significativas en CVAESI que conlleven hospitalización, hospitalización prolongada o muerte: HR 1.19 (0.93 a 1.51) y HR: 0.96 (0.72 a 1.27), respectivamente.

Esta publicación presenta los resultados para este desenlace específico del estudio IMPACT (Lipson 2018).

La confianza con los resultados es moderada debido a la imprecisión en los resultados.

**Calidad moderada**

| <p> <span style="color: orange;">◆</span> FF/UMEC/VI vs FF/VI    <span style="color: green;">◆</span> FF/UMEC/VI vs UMEC/VI </p> <p> <b>Patients with an event, n/N (%)</b> </p> <table border="1"> <thead> <tr> <th></th> <th>FF/UMEC/VI</th> <th>Dual therapy</th> <th></th> <th>Hazard ratio (95% CI)</th> <th>p-value</th> </tr> </thead> <tbody> <tr> <td colspan="6"><b>On-treatment CVAESI</b></td> </tr> <tr> <td>FF/UMEC/VI vs FF/VI</td> <td>450/4151 (11)</td> <td>430/4134 (10)</td> <td></td> <td>0.98 (0.85, 1.11)</td> <td>0.711</td> </tr> <tr> <td>FF/UMEC/VI vs UMEC/VI</td> <td>450/4151 (11)</td> <td>224/2070 (11)</td> <td></td> <td>0.92 (0.78, 1.08)</td> <td>0.317</td> </tr> <tr> <td colspan="6"><b>On-treatment CVAESI leading to hospitalization/prolonged hospitalization or death</b></td> </tr> <tr> <td>FF/UMEC/VI vs FF/VI</td> <td>150/4151 (4)</td> <td>118/4134 (3)</td> <td></td> <td>1.19 (0.93, 1.51)</td> <td>0.167</td> </tr> <tr> <td>FF/UMEC/VI vs UMEC/VI</td> <td>150/4151 (4)</td> <td>72/2070 (3)</td> <td></td> <td>0.96 (0.72, 1.27)</td> <td>0.760</td> </tr> </tbody> </table> <p> </p> |               |               |  |                       |         |  | FF/UMEC/VI | Dual therapy |  | Hazard ratio (95% CI) | p-value | <b>On-treatment CVAESI</b> |  |  |  |  |  | FF/UMEC/VI vs FF/VI | 450/4151 (11) | 430/4134 (10) |  | 0.98 (0.85, 1.11) | 0.711 | FF/UMEC/VI vs UMEC/VI | 450/4151 (11) | 224/2070 (11) |  | 0.92 (0.78, 1.08) | 0.317 | <b>On-treatment CVAESI leading to hospitalization/prolonged hospitalization or death</b> |  |  |  |  |  | FF/UMEC/VI vs FF/VI | 150/4151 (4) | 118/4134 (3) |  | 1.19 (0.93, 1.51) | 0.167 | FF/UMEC/VI vs UMEC/VI | 150/4151 (4) | 72/2070 (3) |  | 0.96 (0.72, 1.27) | 0.760 |
|---------------------------------------------------------------------------------------------------------------------------------------------------------------------------------------------------------------------------------------------------------------------------------------------------------------------------------------------------------------------------------------------------------------------------------------------------------------------------------------------------------------------------------------------------------------------------------------------------------------------------------------------------------------------------------------------------------------------------------------------------------------------------------------------------------------------------------------------------------------------------------------------------------------------------------------------------------------------------------------------------------------------------------------------------------------------------------------------------------------------------------------------|---------------|---------------|--|-----------------------|---------|--|------------|--------------|--|-----------------------|---------|----------------------------|--|--|--|--|--|---------------------|---------------|---------------|--|-------------------|-------|-----------------------|---------------|---------------|--|-------------------|-------|------------------------------------------------------------------------------------------|--|--|--|--|--|---------------------|--------------|--------------|--|-------------------|-------|-----------------------|--------------|-------------|--|-------------------|-------|
|                                                                                                                                                                                                                                                                                                                                                                                                                                                                                                                                                                                                                                                                                                                                                                                                                                                                                                                                                                                                                                                                                                                                             | FF/UMEC/VI    | Dual therapy  |  | Hazard ratio (95% CI) | p-value |  |            |              |  |                       |         |                            |  |  |  |  |  |                     |               |               |  |                   |       |                       |               |               |  |                   |       |                                                                                          |  |  |  |  |  |                     |              |              |  |                   |       |                       |              |             |  |                   |       |
| <b>On-treatment CVAESI</b>                                                                                                                                                                                                                                                                                                                                                                                                                                                                                                                                                                                                                                                                                                                                                                                                                                                                                                                                                                                                                                                                                                                  |               |               |  |                       |         |  |            |              |  |                       |         |                            |  |  |  |  |  |                     |               |               |  |                   |       |                       |               |               |  |                   |       |                                                                                          |  |  |  |  |  |                     |              |              |  |                   |       |                       |              |             |  |                   |       |
| FF/UMEC/VI vs FF/VI                                                                                                                                                                                                                                                                                                                                                                                                                                                                                                                                                                                                                                                                                                                                                                                                                                                                                                                                                                                                                                                                                                                         | 450/4151 (11) | 430/4134 (10) |  | 0.98 (0.85, 1.11)     | 0.711   |  |            |              |  |                       |         |                            |  |  |  |  |  |                     |               |               |  |                   |       |                       |               |               |  |                   |       |                                                                                          |  |  |  |  |  |                     |              |              |  |                   |       |                       |              |             |  |                   |       |
| FF/UMEC/VI vs UMEC/VI                                                                                                                                                                                                                                                                                                                                                                                                                                                                                                                                                                                                                                                                                                                                                                                                                                                                                                                                                                                                                                                                                                                       | 450/4151 (11) | 224/2070 (11) |  | 0.92 (0.78, 1.08)     | 0.317   |  |            |              |  |                       |         |                            |  |  |  |  |  |                     |               |               |  |                   |       |                       |               |               |  |                   |       |                                                                                          |  |  |  |  |  |                     |              |              |  |                   |       |                       |              |             |  |                   |       |
| <b>On-treatment CVAESI leading to hospitalization/prolonged hospitalization or death</b>                                                                                                                                                                                                                                                                                                                                                                                                                                                                                                                                                                                                                                                                                                                                                                                                                                                                                                                                                                                                                                                    |               |               |  |                       |         |  |            |              |  |                       |         |                            |  |  |  |  |  |                     |               |               |  |                   |       |                       |               |               |  |                   |       |                                                                                          |  |  |  |  |  |                     |              |              |  |                   |       |                       |              |             |  |                   |       |
| FF/UMEC/VI vs FF/VI                                                                                                                                                                                                                                                                                                                                                                                                                                                                                                                                                                                                                                                                                                                                                                                                                                                                                                                                                                                                                                                                                                                         | 150/4151 (4)  | 118/4134 (3)  |  | 1.19 (0.93, 1.51)     | 0.167   |  |            |              |  |                       |         |                            |  |  |  |  |  |                     |               |               |  |                   |       |                       |               |               |  |                   |       |                                                                                          |  |  |  |  |  |                     |              |              |  |                   |       |                       |              |             |  |                   |       |
| FF/UMEC/VI vs UMEC/VI                                                                                                                                                                                                                                                                                                                                                                                                                                                                                                                                                                                                                                                                                                                                                                                                                                                                                                                                                                                                                                                                                                                       | 150/4151 (4)  | 72/2070 (3)   |  | 0.96 (0.72, 1.27)     | 0.760   |  |            |              |  |                       |         |                            |  |  |  |  |  |                     |               |               |  |                   |       |                       |               |               |  |                   |       |                                                                                          |  |  |  |  |  |                     |              |              |  |                   |       |                       |              |             |  |                   |       |
| <p>A considerar: para crear la variable combinada CVAESI, los autores utilizaron el diccionario médico estandarizado para actividades reguladoras.</p>                                                                                                                                                                                                                                                                                                                                                                                                                                                                                                                                                                                                                                                                                                                                                                                                                                                                                                                                                                                      |               |               |  |                       |         |  |            |              |  |                       |         |                            |  |  |  |  |  |                     |               |               |  |                   |       |                       |               |               |  |                   |       |                                                                                          |  |  |  |  |  |                     |              |              |  |                   |       |                       |              |             |  |                   |       |
| <b>Balance entre beneficios y riesgos</b>                                                                                                                                                                                                                                                                                                                                                                                                                                                                                                                                                                                                                                                                                                                                                                                                                                                                                                                                                                                                                                                                                                   |               |               |  |                       |         |  |            |              |  |                       |         |                            |  |  |  |  |  |                     |               |               |  |                   |       |                       |               |               |  |                   |       |                                                                                          |  |  |  |  |  |                     |              |              |  |                   |       |                       |              |             |  |                   |       |
| <b>Calidad global de la evidencia</b>                                                                                                                                                                                                                                                                                                                                                                                                                                                                                                                                                                                                                                                                                                                                                                                                                                                                                                                                                                                                                                                                                                       |               |               |  |                       |         |  |            |              |  |                       |         |                            |  |  |  |  |  |                     |               |               |  |                   |       |                       |               |               |  |                   |       |                                                                                          |  |  |  |  |  |                     |              |              |  |                   |       |                       |              |             |  |                   |       |
| <p>El grupo elaborador de la guía consideró las exacerbaciones como desenlaces críticos para la toma de decisiones. Los otros desenlaces se consideraron importantes, pero no críticos para la toma de decisiones.</p> <p>La recomendación se basó en el análisis conjunto de los resultados de los 4 ECA, la confianza global con estos resultados fue moderada debido a la variabilidad de los resultados.</p> <p>Los resultados en la población con eosinófilos bajos fueron imprecisos debido a que no excluyen la posibilidad de un efecto irrelevante mientras que los estimadores para el subgrupo de eosinófilos elevados fueron variables. La confianza en los resultados del análisis de subgrupos fue moderada. En todos los estudios el análisis de subgrupos fue pre-especificado y en un estudio (Rabe 2020) se estratificó la aleatorización según este factor, por lo que no se redujo la confianza con los resultados debido al diseño de los estudios.</p>                                                                                                                                                                |               |               |  |                       |         |  |            |              |  |                       |         |                            |  |  |  |  |  |                     |               |               |  |                   |       |                       |               |               |  |                   |       |                                                                                          |  |  |  |  |  |                     |              |              |  |                   |       |                       |              |             |  |                   |       |
| <b>Valores y preferencias</b>                                                                                                                                                                                                                                                                                                                                                                                                                                                                                                                                                                                                                                                                                                                                                                                                                                                                                                                                                                                                                                                                                                               |               |               |  |                       |         |  |            |              |  |                       |         |                            |  |  |  |  |  |                     |               |               |  |                   |       |                       |               |               |  |                   |       |                                                                                          |  |  |  |  |  |                     |              |              |  |                   |       |                       |              |             |  |                   |       |
| No se realizó una búsqueda formal de la literatura.                                                                                                                                                                                                                                                                                                                                                                                                                                                                                                                                                                                                                                                                                                                                                                                                                                                                                                                                                                                                                                                                                         |               |               |  |                       |         |  |            |              |  |                       |         |                            |  |  |  |  |  |                     |               |               |  |                   |       |                       |               |               |  |                   |       |                                                                                          |  |  |  |  |  |                     |              |              |  |                   |       |                       |              |             |  |                   |       |
| <b>Uso de recursos y costes</b>                                                                                                                                                                                                                                                                                                                                                                                                                                                                                                                                                                                                                                                                                                                                                                                                                                                                                                                                                                                                                                                                                                             |               |               |  |                       |         |  |            |              |  |                       |         |                            |  |  |  |  |  |                     |               |               |  |                   |       |                       |               |               |  |                   |       |                                                                                          |  |  |  |  |  |                     |              |              |  |                   |       |                       |              |             |  |                   |       |
| <p>Se encontró una evaluación económica realizada en dólares canadienses (CAD) a partir de los resultados del estudio IMPACT (Lipson 2018). Se estimaron los años de vida ajustados por calidad (QALY) y los coeficientes de coste-efectividad incremental (ICER)</p> <p>En el análisis coste efectividad, el tratamiento con furoato de fluticasona (FF)/umeclidinio (UMEC)/vilanterol (VI) mostró una diferencia significativa respecto a FF/VI o UMEC/VI: ICER per QALY 18.989 CAD (14.665 CAD a 25.753 CAD) y 13.776 CAD (9.787 CAD a 19.448 CAD), respectivamente.</p> <p>Se podría considerar que los márgenes de los coeficientes de coste-efectividad incremental (hasta un incremento de coste por QALY de 25.700 CAD) se sitúan dentro de los márgenes aceptables.</p> <p>Debido a que no se realizó una búsqueda formal de la literatura se ha realizado una descripción narrativa de este estudio. La interpretación de estos resultados debe ser cautelosa debido a que los costes y la moneda son derivados de otro país.</p>                                                                                                 |               |               |  |                       |         |  |            |              |  |                       |         |                            |  |  |  |  |  |                     |               |               |  |                   |       |                       |               |               |  |                   |       |                                                                                          |  |  |  |  |  |                     |              |              |  |                   |       |                       |              |             |  |                   |       |
| <b>Recomendaciones</b>                                                                                                                                                                                                                                                                                                                                                                                                                                                                                                                                                                                                                                                                                                                                                                                                                                                                                                                                                                                                                                                                                                                      |               |               |  |                       |         |  |            |              |  |                       |         |                            |  |  |  |  |  |                     |               |               |  |                   |       |                       |               |               |  |                   |       |                                                                                          |  |  |  |  |  |                     |              |              |  |                   |       |                       |              |             |  |                   |       |
| En pacientes con agudizaciones a pesar de un tratamiento con LABA/LAMA se sugiere la terapia triple con LABA/LAMA/CI.                                                                                                                                                                                                                                                                                                                                                                                                                                                                                                                                                                                                                                                                                                                                                                                                                                                                                                                                                                                                                       |               |               |  |                       |         |  |            |              |  |                       |         |                            |  |  |  |  |  |                     |               |               |  |                   |       |                       |               |               |  |                   |       |                                                                                          |  |  |  |  |  |                     |              |              |  |                   |       |                       |              |             |  |                   |       |
| <b>Especificaciones</b>                                                                                                                                                                                                                                                                                                                                                                                                                                                                                                                                                                                                                                                                                                                                                                                                                                                                                                                                                                                                                                                                                                                     |               |               |  |                       |         |  |            |              |  |                       |         |                            |  |  |  |  |  |                     |               |               |  |                   |       |                       |               |               |  |                   |       |                                                                                          |  |  |  |  |  |                     |              |              |  |                   |       |                       |              |             |  |                   |       |

La terapia triple con LABA/LAMA/CI ofrece una mayor reducción en el riesgo de agudizaciones y una mayor mejoría en los síntomas que la doble broncodilatación (LABA/LAMA).

No se puede descartar que la reducción en las agudizaciones con la triple terapia frente a LABA/LAMA en pacientes agudizadores no eosinofílicos sea clínicamente irrelevante.



Pregunta: Triple therapy comparado con dual LABA/LAMA combination therapy para COPD

| Certainty assessment                                                                                                                     |                    |                 |                          |                     |                          |                       | Nº de pacientes      |                                    | Efecto                                  |                                               | Certainty        | Importancia |
|------------------------------------------------------------------------------------------------------------------------------------------|--------------------|-----------------|--------------------------|---------------------|--------------------------|-----------------------|----------------------|------------------------------------|-----------------------------------------|-----------------------------------------------|------------------|-------------|
| Nº de estudios                                                                                                                           | Diseño de estudio  | Riesgo de sesgo | Inconsistencia           | Evidencia indirecta | Imprecisión              | Otras consideraciones | Triple therapy       | dual LABA/LAMA combination therapy | Relativo (95% CI)                       | Absoluto (95% CI)                             |                  |             |
| Frecuencia de exacerbaciones (moderadas-severas)                                                                                         |                    |                 |                          |                     |                          |                       |                      |                                    |                                         |                                               |                  |             |
| 4                                                                                                                                        | ensayos aleatorios | no es serio     | serio <sup>a</sup>       | no es serio         | no es serio              | ninguno               | -/7669               | -/5582                             | Razón de tasas<br>0.73<br>(0.64 a 0.83) |                                               | ⊕⊕⊕○<br>MODERADO | CRITICO     |
| Frecuencia de exacerbaciones (moderadas-severas) – subgrupo con eosinófilos elevados                                                     |                    |                 |                          |                     |                          |                       |                      |                                    |                                         |                                               |                  |             |
| 3                                                                                                                                        | ensayos aleatorios | no es serio     | serio <sup>a</sup>       | no es serio         | no es serio              | ninguno               |                      |                                    | Razón de tasas<br>0.67<br>(0.56 a 0.80) |                                               | ⊕⊕⊕○<br>MODERADO | CRITICO     |
| Frecuencia de exacerbaciones (moderadas-severas) – subgrupo con eosinófilos bajos                                                        |                    |                 |                          |                     |                          |                       |                      |                                    |                                         |                                               |                  |             |
| 3                                                                                                                                        | ensayos aleatorios | no es serio     | no es serio              | no es serio         | serio <sup>b</sup>       | ninguno               |                      |                                    | Razón de tasas<br>0.89<br>(0.81 a 0.99) |                                               | ⊕⊕⊕○<br>MODERADO | CRITICO     |
| Mortalidad                                                                                                                               |                    |                 |                          |                     |                          |                       |                      |                                    |                                         |                                               |                  |             |
| 4                                                                                                                                        | ensayos aleatorios | no es serio     | no es serio              | no es serio         | serio <sup>c</sup>       | ninguno               | 139/9812 (1.4%)      | 112/5583 (2.0%)                    | RR 0.70<br>(0.55 a 0.90)                | 6 menos por 1000<br>(de 9 menos a 2 menos )   | ⊕⊕⊕○<br>MODERADO | IMPORTANTE  |
| Calidad de vida (evaluado con : SGRQ - St. George's Respiratory Questionnaire - puntuaciones altas indican limitaciones más importantes) |                    |                 |                          |                     |                          |                       |                      |                                    |                                         |                                               |                  |             |
| 3                                                                                                                                        | ensayos aleatorios | no es serio     | no es serio              | no es serio         | no es serio              | ninguno               | 5619                 | 9239                               | -                                       | MD 1.53 SD menos<br>(2.17 menos a 0.9 menos ) | ⊕⊕⊕⊕<br>ALTA     | IMPORTANTE  |
| Disnea (evaluado con : TDI a menor puntuación, mayor severidad de la disnea)                                                             |                    |                 |                          |                     |                          |                       |                      |                                    |                                         |                                               |                  |             |
| 2                                                                                                                                        | ensayos aleatorios | no es serio     | no es serio              | no es serio         | no es serio              | ninguno               | 2627                 | 2570                               | -                                       | MD 0.31 puntos más<br>(0.1 más a 0.52 más )   | ⊕⊕⊕⊕<br>ALTA     | IMPORTANTE  |
| Efectos indeseados                                                                                                                       |                    |                 |                          |                     |                          |                       |                      |                                    |                                         |                                               |                  |             |
| 4                                                                                                                                        | ensayos aleatorios | no es serio     | no es serio <sup>d</sup> | no es serio         | no es serio <sup>e</sup> | ninguno               | 6223/9822<br>(63.4%) | 3348/5588<br>(59.9%)               | RR 1.01<br>(0.97 a 1.05)                | 6 más por 1000<br>(de 18 menos a 30 más )     | ⊕⊕⊕⊕<br>ALTA     | IMPORTANTE  |
| Incidencia neumonía                                                                                                                      |                    |                 |                          |                     |                          |                       |                      |                                    |                                         |                                               |                  |             |
| 4                                                                                                                                        | ensayos aleatorios | no es serio     | no es serio              | no es serio         | no es serio              | ninguno               | 540/9822 (5.5%)      | 195/5588 (3.5%)                    | RR 1.50<br>(1.27 a 1.76)                | 17 más por 1000<br>(de 9 más a 27 más )       | ⊕⊕⊕⊕<br>ALTA     | IMPORTANTE  |

| Certainty assessment                                                                   |                    |                 |                |                     |                    |                       | Nº de pacientes  |                                    | Efecto                |                                          | Certainty     | Importancia |
|----------------------------------------------------------------------------------------|--------------------|-----------------|----------------|---------------------|--------------------|-----------------------|------------------|------------------------------------|-----------------------|------------------------------------------|---------------|-------------|
| Nº de estudios                                                                         | Diseño de estudio  | Riesgo de sesgo | Inconsistencia | Evidencia indirecta | Imprecisión        | Otras consideraciones | Triple therapy   | dual LABA/LAMA combination therapy | Relativo (95% CI)     | Absoluto (95% CI)                        |               |             |
| Eventos cardiovasculares adversos de interés especial (CVAESI) - FF/UMEC/VI vs FF/VI   |                    |                 |                |                     |                    |                       |                  |                                    |                       |                                          |               |             |
| 1                                                                                      | ensayos aleatorios | no es serio     | no es serio    | no es serio         | serio <sup>f</sup> | ninguno               | 450/4151 (10.8%) | 430/4134 (10.4%)                   | HR 0.98 (0.85 a 1.11) | 2 menos por 1000 (de 15 menos a 11 más ) | ⊕⊕⊕○ MODERADO | IMPORTANTE  |
| Eventos cardiovasculares adversos de interés especial (CVAESI) - FF/UMEC/VI vs UMEC/VI |                    |                 |                |                     |                    |                       |                  |                                    |                       |                                          |               |             |
| 1                                                                                      | ensayos aleatorios | no es serio     | no es serio    | no es serio         | serio <sup>f</sup> | ninguno               | 450/4151 (10.8%) | 224/2070 (10.8%)                   | HR 0.92 (0.78 a 1.08) | 8 menos por 1000 (de 23 menos a 8 más )  | ⊕⊕⊕○ MODERADO | IMPORTANTE  |

CI: Intervalo de confianza ; RR: Razón de riesgo; MD: Diferencia media; HR: Razón de riesgos instantáneos

Explicaciones

- a. El análisis muestra una heterogeneidad significativa y los análisis de subgrupo muestran que pueden existir diferencias relevantes en función de la cifra de eosinófilos en sangre.
- b. El resultado incluye un efecto irrelevante sobre la frecuencia de exacerbaciones
- c. Número de eventos escaso, los resultados incluyen un efecto irrelevante sobre la mortalidad - reducción de 2 eventos por 1000 tratados
- d. Aunque el análisis muestra una heterogeneidad significativa, ésta proviene de los dos estudios de tamaño relativamente pequeño. El estudio que aporta la mayoría de los pacientes y eventos no muestra diferencias entre los dos grupos.
- e. Los efectos absolutos muestran un rango de efectos que probablemente no es clínicamente relevante al tratarse de efectos indeseados de cualquier gravedad.
- f. Los resultados pueden incluir un efecto favorable o perjudicial.

#### Pregunta 4.

| <b>¿Es eficaz el tratamiento aumentativo con AAT para frenar la evolución del enfisema en pacientes con DAAT?</b>                                                                                                                                                                                                                                                                                                                                                                                                                                                                                                                                                                                                                                                                                                                                                                                                                                                                                                                                                                                                                                                                                                                                                                                                                                                                                                                                                                                                                                                                                                                                                                                                                                                                                                                                                                                                                                                                                                                                                                                                                                                                                                                                                                                                                                                                                                                                                                                                                                                                                                                                                                                                                                                                                                                                                                                                                                                                                         |                         |
|-----------------------------------------------------------------------------------------------------------------------------------------------------------------------------------------------------------------------------------------------------------------------------------------------------------------------------------------------------------------------------------------------------------------------------------------------------------------------------------------------------------------------------------------------------------------------------------------------------------------------------------------------------------------------------------------------------------------------------------------------------------------------------------------------------------------------------------------------------------------------------------------------------------------------------------------------------------------------------------------------------------------------------------------------------------------------------------------------------------------------------------------------------------------------------------------------------------------------------------------------------------------------------------------------------------------------------------------------------------------------------------------------------------------------------------------------------------------------------------------------------------------------------------------------------------------------------------------------------------------------------------------------------------------------------------------------------------------------------------------------------------------------------------------------------------------------------------------------------------------------------------------------------------------------------------------------------------------------------------------------------------------------------------------------------------------------------------------------------------------------------------------------------------------------------------------------------------------------------------------------------------------------------------------------------------------------------------------------------------------------------------------------------------------------------------------------------------------------------------------------------------------------------------------------------------------------------------------------------------------------------------------------------------------------------------------------------------------------------------------------------------------------------------------------------------------------------------------------------------------------------------------------------------------------------------------------------------------------------------------------------------|-------------------------|
| <p>Se identificaron dos revisiones sistemáticas, que incluían 3 ensayos clínicos aleatorizados (ECAs) que evalúan los efectos del tratamiento aumentativo con alfa-1 antitripsina en pacientes con deficiencia de alfa-1 antitripsina (DAAT) y enfermedad pulmonar. Posteriormente se identificó un ensayo clínico relevante (llamado RAPID-OLE). Este estudio se trata de una extensión de uno de los ECAs identificados (ECA RAPID).</p> <p>Para el análisis se seleccionaron los 3 ECAs. En general, todos los tres estudios incluyeron pacientes adultos no fumadores o ex fumadores. La mayoría de ellos con DAAT (concentración sérica <math>\leq 11\mu\text{M}</math>) y enfisema pulmonar moderado (volumen espiratorio forzado en el primer segundo (FEV<sub>1</sub>) entre el 35% y 70% del valor normal predicho).</p> <p>El estudio RAPID-OLE no se incluyó en el metaanálisis. Este EC evalúa los efectos en los pacientes que fueron aleatorizados en el grupo de tratamiento al ECA inicial (ECA RAPID) y que siguieron con el tratamiento (grupo de inicio temprano) respecto con los que fueron aleatorizados en el grupo placebo al ECA inicial (RAPID) y que recibieron tratamiento con alfa-1 antitripsina (grupo de inicio tardío).</p> <p><b>Revisiones sistemáticas:</b></p> <ol style="list-style-type: none"> <li>1. Edgar RG, Patel M, Bayliss S, Crossley D, Sapey E, Turner AM. Treatment of lung disease in alpha-1 antitrypsin deficiency: a systematic review. <i>Int J Chron Obstruct Pulmon Dis</i>. 2017;12:1295-308.</li> <li>2. Gøtzsche PC, Johansen HK. Intravenous alpha-1 antitrypsin augmentation therapy for treating patients with alpha-1 antitrypsin deficiency and lung disease. <i>Cochrane Database Syst Rev</i>. 2016;9(9):Cd007851.</li> </ol> <p><b>Ensayos clínicos aleatorizados:</b></p> <ol style="list-style-type: none"> <li>3. Chapman KR, Burdon JG, Piitulainen E, et al. Intravenous augmentation treatment and lung density in severe alpha1 antitrypsin deficiency (RAPID): a randomised, double-blind, placebo-controlled trial. <i>Lancet</i>. 2015;386(9991):360–368.</li> <li>4. Dirksen A, Piitulainen E, Parr DG, et al. Exploring the role of CT densitometry: a randomised study of augmentation therapy in alpha1-antitrypsin deficiency. <i>Eur Respir J</i>. 2009;33(6):1345–1353.</li> <li>5. Dirksen A, Dijkman JH, Madsen F, et al. A randomized clinical trial of alpha1-antitrypsin augmentation therapy. <i>Am J Respir Crit Care Med</i>. 1999;160(5 Pt I):1468–1472.</li> </ol> <p><b>Ensayo clínico no aleatorizado:</b></p> <ol style="list-style-type: none"> <li>6. McElvaney NG, Burdon J, Holmes M, Glanville A, Wark PA, Thompson PJ, et al. Long-term efficacy and safety of <math>\alpha 1</math> proteinase inhibitor treatment for emphysema caused by severe <math>\alpha 1</math> antitrypsin deficiency: an open-label extension trial (RAPID-OLE). <i>Lancet Respir Med</i>. 2017;5(1):51-60.</li> </ol> |                         |
| <b>ALFA-1 ANTITRIPSINA vs PLACEBO</b>                                                                                                                                                                                                                                                                                                                                                                                                                                                                                                                                                                                                                                                                                                                                                                                                                                                                                                                                                                                                                                                                                                                                                                                                                                                                                                                                                                                                                                                                                                                                                                                                                                                                                                                                                                                                                                                                                                                                                                                                                                                                                                                                                                                                                                                                                                                                                                                                                                                                                                                                                                                                                                                                                                                                                                                                                                                                                                                                                                     |                         |
| <b>Densidad pulmonar medida por tomografía computarizada</b>                                                                                                                                                                                                                                                                                                                                                                                                                                                                                                                                                                                                                                                                                                                                                                                                                                                                                                                                                                                                                                                                                                                                                                                                                                                                                                                                                                                                                                                                                                                                                                                                                                                                                                                                                                                                                                                                                                                                                                                                                                                                                                                                                                                                                                                                                                                                                                                                                                                                                                                                                                                                                                                                                                                                                                                                                                                                                                                                              |                         |
| <p>En el análisis conjunto de los datos (3 ECAs, 300 pacientes), el tratamiento con alfa-1 antitripsina se asoció a un incremento significativo de la densidad pulmonar (medida por TC) frente a placebo: MD 0.86 g/L más (0.31 más a 1.42 más).</p> <p>Entre los dos años y cuatro años de seguimiento del estudio RAPID-OLE (139 pacientes) no se observaron diferencias significativas entre el grupo de inicio tardío (placebo seguido de alfa-1 antitripsina) y el grupo de inicio temprano (alfa-1 antitripsina): MD 0.37 g/L menos (1.16 menos a 0.42 más).</p> <p>La confianza en este resultado es moderada (ver tabla de resumen de resultados).</p>                                                                                                                                                                                                                                                                                                                                                                                                                                                                                                                                                                                                                                                                                                                                                                                                                                                                                                                                                                                                                                                                                                                                                                                                                                                                                                                                                                                                                                                                                                                                                                                                                                                                                                                                                                                                                                                                                                                                                                                                                                                                                                                                                                                                                                                                                                                                            | <b>Calidad moderada</b> |

| <table><tr><th rowspan="2">Study or Subgroup</th><th colspan="3">Alpha-1 antitrypsin</th><th colspan="3">Placebo</th><th rowspan="2">Weight</th><th rowspan="2">Mean Difference<br/>IV, Fixed, 95% CI</th></tr><tr><th>Mean</th><th>SD</th><th>Total</th><th>Mean</th><th>SD</th><th>Total</th></tr><tr><td>Chapman 2015</td><td>-1.45</td><td>2.2061</td><td>92</td><td>-2.19</td><td>2.3049</td><td>85</td><td>69.3%</td><td>0.74 [-0.07, 1.41]</td></tr><tr><td>Dirksen 1999</td><td>-1.5</td><td>2.17</td><td>28</td><td>-2.57</td><td>2.17</td><td>28</td><td>23.8%</td><td>1.07 [-0.07, 2.21]</td></tr><tr><td>Dirksen 2009</td><td>-2.87</td><td>4.91</td><td>35</td><td>-4.24</td><td>3.87</td><td>32</td><td>6.9%</td><td>1.37 [-0.74, 3.48]</td></tr><tr><td colspan="7">Total (95% CI)</td><td>155</td><td>145</td><td>100.0%</td><td>0.86 [0.31, 1.42]</td></tr><tr><td colspan="10">Heterogeneity: Chi² = 0.48, df = 2 (P = 0.79); I² = 0%</td></tr><tr><td colspan="10">Test for overall effect: Z = 3.05 (P = 0.002)</td></tr></table> |                     |        |       |         |        |       |        |                                           |        | Study or Subgroup       | Alpha-1 antitrypsin |                   |                     | Placebo |  |         | Weight | Mean Difference<br>IV, Fixed, 95% CI | Mean   | SD                                        | Total | Mean | SD    | Total | Chapman 2015 | -1.45 | 2.2061       | 92   | -2.19 | 2.3049 | 85   | 69.3% | 0.74 [-0.07, 1.41]  | Dirksen 1999 | -1.5                | 2.17         | 28    | -2.57 | 2.17   | 28    | 23.8% | 1.07 [-0.07, 2.21]  | Dirksen 2009   | -2.87               | 4.91         | 35    | -4.24 | 3.87 | 32    | 6.9% | 1.37 [-0.74, 3.48] | Total (95% CI) |                     |                                                                                      |  |  |  |  | 155 | 145 | 100.0% | 0.86 [0.31, 1.42] | Heterogeneity: Chi² = 0.48, df = 2 (P = 0.79); I² = 0% |                     |                                                                                      |  |  |  |  |  |  |  | Test for overall effect: Z = 3.05 (P = 0.002) |  |  |  |  |  |  |  |  |  | 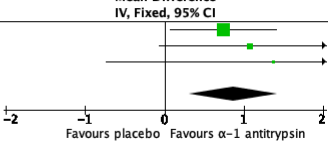 |  |
|-------------------------------------------------------------------------------------------------------------------------------------------------------------------------------------------------------------------------------------------------------------------------------------------------------------------------------------------------------------------------------------------------------------------------------------------------------------------------------------------------------------------------------------------------------------------------------------------------------------------------------------------------------------------------------------------------------------------------------------------------------------------------------------------------------------------------------------------------------------------------------------------------------------------------------------------------------------------------------------------------------------------------------------------------------|---------------------|--------|-------|---------|--------|-------|--------|-------------------------------------------|--------|-------------------------|---------------------|-------------------|---------------------|---------|--|---------|--------|--------------------------------------|--------|-------------------------------------------|-------|------|-------|-------|--------------|-------|--------------|------|-------|--------|------|-------|---------------------|--------------|---------------------|--------------|-------|-------|--------|-------|-------|---------------------|----------------|---------------------|--------------|-------|-------|------|-------|------|--------------------|----------------|---------------------|--------------------------------------------------------------------------------------|--|--|--|--|-----|-----|--------|-------------------|--------------------------------------------------------|---------------------|--------------------------------------------------------------------------------------|--|--|--|--|--|--|--|-----------------------------------------------|--|--|--|--|--|--|--|--|--|------------------------------------------------------------------------------------|--|
| Study or Subgroup                                                                                                                                                                                                                                                                                                                                                                                                                                                                                                                                                                                                                                                                                                                                                                                                                                                                                                                                                                                                                                     | Alpha-1 antitrypsin |        |       | Placebo |        |       | Weight | Mean Difference<br>IV, Fixed, 95% CI      |        |                         |                     |                   |                     |         |  |         |        |                                      |        |                                           |       |      |       |       |              |       |              |      |       |        |      |       |                     |              |                     |              |       |       |        |       |       |                     |                |                     |              |       |       |      |       |      |                    |                |                     |                                                                                      |  |  |  |  |     |     |        |                   |                                                        |                     |                                                                                      |  |  |  |  |  |  |  |                                               |  |  |  |  |  |  |  |  |  |                                                                                    |  |
|                                                                                                                                                                                                                                                                                                                                                                                                                                                                                                                                                                                                                                                                                                                                                                                                                                                                                                                                                                                                                                                       | Mean                | SD     | Total | Mean    | SD     | Total |        |                                           |        |                         |                     |                   |                     |         |  |         |        |                                      |        |                                           |       |      |       |       |              |       |              |      |       |        |      |       |                     |              |                     |              |       |       |        |       |       |                     |                |                     |              |       |       |      |       |      |                    |                |                     |                                                                                      |  |  |  |  |     |     |        |                   |                                                        |                     |                                                                                      |  |  |  |  |  |  |  |                                               |  |  |  |  |  |  |  |  |  |                                                                                    |  |
| Chapman 2015                                                                                                                                                                                                                                                                                                                                                                                                                                                                                                                                                                                                                                                                                                                                                                                                                                                                                                                                                                                                                                          | -1.45               | 2.2061 | 92    | -2.19   | 2.3049 | 85    | 69.3%  | 0.74 [-0.07, 1.41]                        |        |                         |                     |                   |                     |         |  |         |        |                                      |        |                                           |       |      |       |       |              |       |              |      |       |        |      |       |                     |              |                     |              |       |       |        |       |       |                     |                |                     |              |       |       |      |       |      |                    |                |                     |                                                                                      |  |  |  |  |     |     |        |                   |                                                        |                     |                                                                                      |  |  |  |  |  |  |  |                                               |  |  |  |  |  |  |  |  |  |                                                                                    |  |
| Dirksen 1999                                                                                                                                                                                                                                                                                                                                                                                                                                                                                                                                                                                                                                                                                                                                                                                                                                                                                                                                                                                                                                          | -1.5                | 2.17   | 28    | -2.57   | 2.17   | 28    | 23.8%  | 1.07 [-0.07, 2.21]                        |        |                         |                     |                   |                     |         |  |         |        |                                      |        |                                           |       |      |       |       |              |       |              |      |       |        |      |       |                     |              |                     |              |       |       |        |       |       |                     |                |                     |              |       |       |      |       |      |                    |                |                     |                                                                                      |  |  |  |  |     |     |        |                   |                                                        |                     |                                                                                      |  |  |  |  |  |  |  |                                               |  |  |  |  |  |  |  |  |  |                                                                                    |  |
| Dirksen 2009                                                                                                                                                                                                                                                                                                                                                                                                                                                                                                                                                                                                                                                                                                                                                                                                                                                                                                                                                                                                                                          | -2.87               | 4.91   | 35    | -4.24   | 3.87   | 32    | 6.9%   | 1.37 [-0.74, 3.48]                        |        |                         |                     |                   |                     |         |  |         |        |                                      |        |                                           |       |      |       |       |              |       |              |      |       |        |      |       |                     |              |                     |              |       |       |        |       |       |                     |                |                     |              |       |       |      |       |      |                    |                |                     |                                                                                      |  |  |  |  |     |     |        |                   |                                                        |                     |                                                                                      |  |  |  |  |  |  |  |                                               |  |  |  |  |  |  |  |  |  |                                                                                    |  |
| Total (95% CI)                                                                                                                                                                                                                                                                                                                                                                                                                                                                                                                                                                                                                                                                                                                                                                                                                                                                                                                                                                                                                                        |                     |        |       |         |        |       | 155    | 145                                       | 100.0% | 0.86 [0.31, 1.42]       |                     |                   |                     |         |  |         |        |                                      |        |                                           |       |      |       |       |              |       |              |      |       |        |      |       |                     |              |                     |              |       |       |        |       |       |                     |                |                     |              |       |       |      |       |      |                    |                |                     |                                                                                      |  |  |  |  |     |     |        |                   |                                                        |                     |                                                                                      |  |  |  |  |  |  |  |                                               |  |  |  |  |  |  |  |  |  |                                                                                    |  |
| Heterogeneity: Chi² = 0.48, df = 2 (P = 0.79); I² = 0%                                                                                                                                                                                                                                                                                                                                                                                                                                                                                                                                                                                                                                                                                                                                                                                                                                                                                                                                                                                                |                     |        |       |         |        |       |        |                                           |        |                         |                     |                   |                     |         |  |         |        |                                      |        |                                           |       |      |       |       |              |       |              |      |       |        |      |       |                     |              |                     |              |       |       |        |       |       |                     |                |                     |              |       |       |      |       |      |                    |                |                     |                                                                                      |  |  |  |  |     |     |        |                   |                                                        |                     |                                                                                      |  |  |  |  |  |  |  |                                               |  |  |  |  |  |  |  |  |  |                                                                                    |  |
| Test for overall effect: Z = 3.05 (P = 0.002)                                                                                                                                                                                                                                                                                                                                                                                                                                                                                                                                                                                                                                                                                                                                                                                                                                                                                                                                                                                                         |                     |        |       |         |        |       |        |                                           |        |                         |                     |                   |                     |         |  |         |        |                                      |        |                                           |       |      |       |       |              |       |              |      |       |        |      |       |                     |              |                     |              |       |       |        |       |       |                     |                |                     |              |       |       |      |       |      |                    |                |                     |                                                                                      |  |  |  |  |     |     |        |                   |                                                        |                     |                                                                                      |  |  |  |  |  |  |  |                                               |  |  |  |  |  |  |  |  |  |                                                                                    |  |
| <b>Función pulmonar - FEV<sub>1</sub> (porcentaje predicho)</b>                                                                                                                                                                                                                                                                                                                                                                                                                                                                                                                                                                                                                                                                                                                                                                                                                                                                                                                                                                                       |                     |        |       |         |        |       |        |                                           |        |                         |                     |                   |                     |         |  |         |        |                                      |        |                                           |       |      |       |       |              |       |              |      |       |        |      |       |                     |              |                     |              |       |       |        |       |       |                     |                |                     |              |       |       |      |       |      |                    |                |                     |                                                                                      |  |  |  |  |     |     |        |                   |                                                        |                     |                                                                                      |  |  |  |  |  |  |  |                                               |  |  |  |  |  |  |  |  |  |                                                                                    |  |
| En el análisis conjunto de los datos (2 ECAs, 236 pacientes), no se observan diferencias en el porcentaje predicho anual de FEV <sub>1</sub> en el tratamiento con alfa-1 antitripsina respecto al placebo: MD 0.65 % predicho menos (1.45 menos a 0.15 más).                                                                                                                                                                                                                                                                                                                                                                                                                                                                                                                                                                                                                                                                                                                                                                                         |                     |        |       |         |        |       |        |                                           |        | <b>Calidad moderada</b> |                     |                   |                     |         |  |         |        |                                      |        |                                           |       |      |       |       |              |       |              |      |       |        |      |       |                     |              |                     |              |       |       |        |       |       |                     |                |                     |              |       |       |      |       |      |                    |                |                     |                                                                                      |  |  |  |  |     |     |        |                   |                                                        |                     |                                                                                      |  |  |  |  |  |  |  |                                               |  |  |  |  |  |  |  |  |  |                                                                                    |  |
| En el estudio RAPID-OLE (140 pacientes) el grupo de inicio tardío (placebo seguido de alfa-1 antitripsina) tampoco mostró diferencias significativas respecto al grupo de inicio temprano: MD 1.53 % predicho menos (6.17 menos a 3.12 más).                                                                                                                                                                                                                                                                                                                                                                                                                                                                                                                                                                                                                                                                                                                                                                                                          |                     |        |       |         |        |       |        |                                           |        |                         |                     |                   |                     |         |  |         |        |                                      |        |                                           |       |      |       |       |              |       |              |      |       |        |      |       |                     |              |                     |              |       |       |        |       |       |                     |                |                     |              |       |       |      |       |      |                    |                |                     |                                                                                      |  |  |  |  |     |     |        |                   |                                                        |                     |                                                                                      |  |  |  |  |  |  |  |                                               |  |  |  |  |  |  |  |  |  |                                                                                    |  |
| La confianza en este resultado es moderada (ver tabla de resumen de resultados).                                                                                                                                                                                                                                                                                                                                                                                                                                                                                                                                                                                                                                                                                                                                                                                                                                                                                                                                                                      |                     |        |       |         |        |       |        |                                           |        |                         |                     |                   |                     |         |  |         |        |                                      |        |                                           |       |      |       |       |              |       |              |      |       |        |      |       |                     |              |                     |              |       |       |        |       |       |                     |                |                     |              |       |       |      |       |      |                    |                |                     |                                                                                      |  |  |  |  |     |     |        |                   |                                                        |                     |                                                                                      |  |  |  |  |  |  |  |                                               |  |  |  |  |  |  |  |  |  |                                                                                    |  |
| <table><tr><th rowspan="2">Study or Subgroup</th><th colspan="3">Alpha-1 antitrypsin</th><th colspan="3">Placebo</th><th rowspan="2">Weight</th><th rowspan="2">Mean Difference<br/>IV, Fixed, 95% CI</th></tr><tr><th>Mean</th><th>SD</th><th>Total</th><th>Mean</th><th>SD</th><th>Total</th></tr><tr><td>Chapman 2015</td><td>-3.1</td><td>10.7</td><td>93</td><td>-2.3</td><td>13.1</td><td>87</td><td>5.2%</td><td>-0.80 [-4.31, 2.71]</td></tr><tr><td>Dirksen 1999</td><td>-2.11</td><td>1.5652</td><td>28</td><td>-1.47</td><td>1.5652</td><td>28</td><td>94.8%</td><td>-0.64 [-1.46, 0.18]</td></tr><tr><td colspan="7">Total (95% CI)</td><td>121</td><td>115</td><td>100.0%</td><td>-0.65 [-1.45, 0.15]</td></tr></table>                                                                                                                                                                                                                                                                                                                  |                     |        |       |         |        |       |        |                                           |        | Study or Subgroup       | Alpha-1 antitrypsin |                   |                     | Placebo |  |         | Weight | Mean Difference<br>IV, Fixed, 95% CI | Mean   | SD                                        | Total | Mean | SD    | Total | Chapman 2015 | -3.1  | 10.7         | 93   | -2.3  | 13.1   | 87   | 5.2%  | -0.80 [-4.31, 2.71] | Dirksen 1999 | -2.11               | 1.5652       | 28    | -1.47 | 1.5652 | 28    | 94.8% | -0.64 [-1.46, 0.18] | Total (95% CI) |                     |              |       |       |      |       | 121  | 115                | 100.0%         | -0.65 [-1.45, 0.15] |    |  |  |  |  |     |     |        |                   |                                                        |                     |                                                                                      |  |  |  |  |  |  |  |                                               |  |  |  |  |  |  |  |  |  |                                                                                    |  |
| Study or Subgroup                                                                                                                                                                                                                                                                                                                                                                                                                                                                                                                                                                                                                                                                                                                                                                                                                                                                                                                                                                                                                                     | Alpha-1 antitrypsin |        |       | Placebo |        |       | Weight | Mean Difference<br>IV, Fixed, 95% CI      |        |                         |                     |                   |                     |         |  |         |        |                                      |        |                                           |       |      |       |       |              |       |              |      |       |        |      |       |                     |              |                     |              |       |       |        |       |       |                     |                |                     |              |       |       |      |       |      |                    |                |                     |                                                                                      |  |  |  |  |     |     |        |                   |                                                        |                     |                                                                                      |  |  |  |  |  |  |  |                                               |  |  |  |  |  |  |  |  |  |                                                                                    |  |
|                                                                                                                                                                                                                                                                                                                                                                                                                                                                                                                                                                                                                                                                                                                                                                                                                                                                                                                                                                                                                                                       | Mean                | SD     | Total | Mean    | SD     | Total |        |                                           |        |                         |                     |                   |                     |         |  |         |        |                                      |        |                                           |       |      |       |       |              |       |              |      |       |        |      |       |                     |              |                     |              |       |       |        |       |       |                     |                |                     |              |       |       |      |       |      |                    |                |                     |                                                                                      |  |  |  |  |     |     |        |                   |                                                        |                     |                                                                                      |  |  |  |  |  |  |  |                                               |  |  |  |  |  |  |  |  |  |                                                                                    |  |
| Chapman 2015                                                                                                                                                                                                                                                                                                                                                                                                                                                                                                                                                                                                                                                                                                                                                                                                                                                                                                                                                                                                                                          | -3.1                | 10.7   | 93    | -2.3    | 13.1   | 87    | 5.2%   | -0.80 [-4.31, 2.71]                       |        |                         |                     |                   |                     |         |  |         |        |                                      |        |                                           |       |      |       |       |              |       |              |      |       |        |      |       |                     |              |                     |              |       |       |        |       |       |                     |                |                     |              |       |       |      |       |      |                    |                |                     |                                                                                      |  |  |  |  |     |     |        |                   |                                                        |                     |                                                                                      |  |  |  |  |  |  |  |                                               |  |  |  |  |  |  |  |  |  |                                                                                    |  |
| Dirksen 1999                                                                                                                                                                                                                                                                                                                                                                                                                                                                                                                                                                                                                                                                                                                                                                                                                                                                                                                                                                                                                                          | -2.11               | 1.5652 | 28    | -1.47   | 1.5652 | 28    | 94.8%  | -0.64 [-1.46, 0.18]                       |        |                         |                     |                   |                     |         |  |         |        |                                      |        |                                           |       |      |       |       |              |       |              |      |       |        |      |       |                     |              |                     |              |       |       |        |       |       |                     |                |                     |              |       |       |      |       |      |                    |                |                     |                                                                                      |  |  |  |  |     |     |        |                   |                                                        |                     |                                                                                      |  |  |  |  |  |  |  |                                               |  |  |  |  |  |  |  |  |  |                                                                                    |  |
| Total (95% CI)                                                                                                                                                                                                                                                                                                                                                                                                                                                                                                                                                                                                                                                                                                                                                                                                                                                                                                                                                                                                                                        |                     |        |       |         |        |       | 121    | 115                                       | 100.0% | -0.65 [-1.45, 0.15]     |                     |                   |                     |         |  |         |        |                                      |        |                                           |       |      |       |       |              |       |              |      |       |        |      |       |                     |              |                     |              |       |       |        |       |       |                     |                |                     |              |       |       |      |       |      |                    |                |                     |                                                                                      |  |  |  |  |     |     |        |                   |                                                        |                     |                                                                                      |  |  |  |  |  |  |  |                                               |  |  |  |  |  |  |  |  |  |                                                                                    |  |
| <b>Función pulmonar - Capacidad de difusión de monóxido de carbono (DLCO)</b>                                                                                                                                                                                                                                                                                                                                                                                                                                                                                                                                                                                                                                                                                                                                                                                                                                                                                                                                                                         |                     |        |       |         |        |       |        |                                           |        |                         |                     |                   |                     |         |  |         |        |                                      |        |                                           |       |      |       |       |              |       |              |      |       |        |      |       |                     |              |                     |              |       |       |        |       |       |                     |                |                     |              |       |       |      |       |      |                    |                |                     |                                                                                      |  |  |  |  |     |     |        |                   |                                                        |                     |                                                                                      |  |  |  |  |  |  |  |                                               |  |  |  |  |  |  |  |  |  |                                                                                    |  |
| En el análisis conjunto de los datos (3 ECAs, 313 pacientes), no muestra diferencias significativas en la capacidad de difusión de monóxido de carbono en el tratamiento con alfa-1 antitripsina respecto al placebo: SMD: 0.11 menos (0.33 menos a 0.11 más). El resultado se expresa en diferencias de la media estandarizadas debido a las diferentes unidades de medida.                                                                                                                                                                                                                                                                                                                                                                                                                                                                                                                                                                                                                                                                          |                     |        |       |         |        |       |        |                                           |        | <b>Calidad moderada</b> |                     |                   |                     |         |  |         |        |                                      |        |                                           |       |      |       |       |              |       |              |      |       |        |      |       |                     |              |                     |              |       |       |        |       |       |                     |                |                     |              |       |       |      |       |      |                    |                |                     |                                                                                      |  |  |  |  |     |     |        |                   |                                                        |                     |                                                                                      |  |  |  |  |  |  |  |                                               |  |  |  |  |  |  |  |  |  |                                                                                    |  |
| La confianza en este resultado es moderada (ver tabla de resumen de resultados).                                                                                                                                                                                                                                                                                                                                                                                                                                                                                                                                                                                                                                                                                                                                                                                                                                                                                                                                                                      |                     |        |       |         |        |       |        |                                           |        |                         |                     |                   |                     |         |  |         |        |                                      |        |                                           |       |      |       |       |              |       |              |      |       |        |      |       |                     |              |                     |              |       |       |        |       |       |                     |                |                     |              |       |       |      |       |      |                    |                |                     |                                                                                      |  |  |  |  |     |     |        |                   |                                                        |                     |                                                                                      |  |  |  |  |  |  |  |                                               |  |  |  |  |  |  |  |  |  |                                                                                    |  |
| <table><tr><th rowspan="2">Study or Subgroup</th><th colspan="3">Alpha-1 antitrypsin</th><th colspan="3">Placebo</th><th rowspan="2">Weight</th><th rowspan="2">Std. Mean Difference<br/>IV, Fixed, 95% CI</th></tr><tr><th>Mean</th><th>SD</th><th>Total</th><th>Mean</th><th>SD</th><th>Total</th></tr><tr><td>Chapman 2015</td><td>-2.2</td><td>18.2</td><td>93</td><td>-1.5</td><td>19.5</td><td>87</td><td>57.6%</td><td>-0.04 [-0.33, 0.26]</td></tr><tr><td>Dirksen 1999</td><td>-0.19</td><td>0.25</td><td>28</td><td>-0.16</td><td>0.25</td><td>28</td><td>17.9%</td><td>-0.12 [-0.64, 0.41]</td></tr><tr><td>Dirksen 2009</td><td>-0.46</td><td>0.44</td><td>38</td><td>-0.34</td><td>0.46</td><td>39</td><td>24.5%</td><td>-0.26 [-0.71, 0.18]</td></tr><tr><td colspan="7">Total (95% CI)</td><td>159</td><td>154</td><td>100.0%</td><td>-0.11 [-0.33, 0.11]</td></tr></table>                                                                                                                                                            |                     |        |       |         |        |       |        |                                           |        |                         |                     | Study or Subgroup | Alpha-1 antitrypsin |         |  | Placebo |        |                                      | Weight | Std. Mean Difference<br>IV, Fixed, 95% CI | Mean  | SD   | Total | Mean  | SD           | Total | Chapman 2015 | -2.2 | 18.2  | 93     | -1.5 | 19.5  | 87                  | 57.6%        | -0.04 [-0.33, 0.26] | Dirksen 1999 | -0.19 | 0.25  | 28     | -0.16 | 0.25  | 28                  | 17.9%          | -0.12 [-0.64, 0.41] | Dirksen 2009 | -0.46 | 0.44  | 38   | -0.34 | 0.46 | 39                 | 24.5%          | -0.26 [-0.71, 0.18] | Total (95% CI)                                                                       |  |  |  |  |     |     | 159    | 154               | 100.0%                                                 | -0.11 [-0.33, 0.11] |  |  |  |  |  |  |  |  |                                               |  |  |  |  |  |  |  |  |  |                                                                                    |  |
| Study or Subgroup                                                                                                                                                                                                                                                                                                                                                                                                                                                                                                                                                                                                                                                                                                                                                                                                                                                                                                                                                                                                                                     | Alpha-1 antitrypsin |        |       | Placebo |        |       | Weight | Std. Mean Difference<br>IV, Fixed, 95% CI |        |                         |                     |                   |                     |         |  |         |        |                                      |        |                                           |       |      |       |       |              |       |              |      |       |        |      |       |                     |              |                     |              |       |       |        |       |       |                     |                |                     |              |       |       |      |       |      |                    |                |                     |                                                                                      |  |  |  |  |     |     |        |                   |                                                        |                     |                                                                                      |  |  |  |  |  |  |  |                                               |  |  |  |  |  |  |  |  |  |                                                                                    |  |
|                                                                                                                                                                                                                                                                                                                                                                                                                                                                                                                                                                                                                                                                                                                                                                                                                                                                                                                                                                                                                                                       | Mean                | SD     | Total | Mean    | SD     | Total |        |                                           |        |                         |                     |                   |                     |         |  |         |        |                                      |        |                                           |       |      |       |       |              |       |              |      |       |        |      |       |                     |              |                     |              |       |       |        |       |       |                     |                |                     |              |       |       |      |       |      |                    |                |                     |                                                                                      |  |  |  |  |     |     |        |                   |                                                        |                     |                                                                                      |  |  |  |  |  |  |  |                                               |  |  |  |  |  |  |  |  |  |                                                                                    |  |
| Chapman 2015                                                                                                                                                                                                                                                                                                                                                                                                                                                                                                                                                                                                                                                                                                                                                                                                                                                                                                                                                                                                                                          | -2.2                | 18.2   | 93    | -1.5    | 19.5   | 87    | 57.6%  | -0.04 [-0.33, 0.26]                       |        |                         |                     |                   |                     |         |  |         |        |                                      |        |                                           |       |      |       |       |              |       |              |      |       |        |      |       |                     |              |                     |              |       |       |        |       |       |                     |                |                     |              |       |       |      |       |      |                    |                |                     |                                                                                      |  |  |  |  |     |     |        |                   |                                                        |                     |                                                                                      |  |  |  |  |  |  |  |                                               |  |  |  |  |  |  |  |  |  |                                                                                    |  |
| Dirksen 1999                                                                                                                                                                                                                                                                                                                                                                                                                                                                                                                                                                                                                                                                                                                                                                                                                                                                                                                                                                                                                                          | -0.19               | 0.25   | 28    | -0.16   | 0.25   | 28    | 17.9%  | -0.12 [-0.64, 0.41]                       |        |                         |                     |                   |                     |         |  |         |        |                                      |        |                                           |       |      |       |       |              |       |              |      |       |        |      |       |                     |              |                     |              |       |       |        |       |       |                     |                |                     |              |       |       |      |       |      |                    |                |                     |                                                                                      |  |  |  |  |     |     |        |                   |                                                        |                     |                                                                                      |  |  |  |  |  |  |  |                                               |  |  |  |  |  |  |  |  |  |                                                                                    |  |
| Dirksen 2009                                                                                                                                                                                                                                                                                                                                                                                                                                                                                                                                                                                                                                                                                                                                                                                                                                                                                                                                                                                                                                          | -0.46               | 0.44   | 38    | -0.34   | 0.46   | 39    | 24.5%  | -0.26 [-0.71, 0.18]                       |        |                         |                     |                   |                     |         |  |         |        |                                      |        |                                           |       |      |       |       |              |       |              |      |       |        |      |       |                     |              |                     |              |       |       |        |       |       |                     |                |                     |              |       |       |      |       |      |                    |                |                     |                                                                                      |  |  |  |  |     |     |        |                   |                                                        |                     |                                                                                      |  |  |  |  |  |  |  |                                               |  |  |  |  |  |  |  |  |  |                                                                                    |  |
| Total (95% CI)                                                                                                                                                                                                                                                                                                                                                                                                                                                                                                                                                                                                                                                                                                                                                                                                                                                                                                                                                                                                                                        |                     |        |       |         |        |       | 159    | 154                                       | 100.0% | -0.11 [-0.33, 0.11]     |                     |                   |                     |         |  |         |        |                                      |        |                                           |       |      |       |       |              |       |              |      |       |        |      |       |                     |              |                     |              |       |       |        |       |       |                     |                |                     |              |       |       |      |       |      |                    |                |                     |                                                                                      |  |  |  |  |     |     |        |                   |                                                        |                     |                                                                                      |  |  |  |  |  |  |  |                                               |  |  |  |  |  |  |  |  |  |                                                                                    |  |
| <b>Calidad de vida - St. George's Respiratory Questionnaire (SGRQ)</b>                                                                                                                                                                                                                                                                                                                                                                                                                                                                                                                                                                                                                                                                                                                                                                                                                                                                                                                                                                                |                     |        |       |         |        |       |        |                                           |        |                         |                     |                   |                     |         |  |         |        |                                      |        |                                           |       |      |       |       |              |       |              |      |       |        |      |       |                     |              |                     |              |       |       |        |       |       |                     |                |                     |              |       |       |      |       |      |                    |                |                     |                                                                                      |  |  |  |  |     |     |        |                   |                                                        |                     |                                                                                      |  |  |  |  |  |  |  |                                               |  |  |  |  |  |  |  |  |  |                                                                                    |  |
| En el análisis conjunto de los datos (2 ECAs, 254 pacientes), no se observan diferencias significativas de calidad de vida en el tratamiento con alfa-1 antitripsina respecto al placebo: MD 0.83 menos (3.55 menos a 1.89 más).                                                                                                                                                                                                                                                                                                                                                                                                                                                                                                                                                                                                                                                                                                                                                                                                                      |                     |        |       |         |        |       |        |                                           |        | <b>Calidad moderada</b> |                     |                   |                     |         |  |         |        |                                      |        |                                           |       |      |       |       |              |       |              |      |       |        |      |       |                     |              |                     |              |       |       |        |       |       |                     |                |                     |              |       |       |      |       |      |                    |                |                     |                                                                                      |  |  |  |  |     |     |        |                   |                                                        |                     |                                                                                      |  |  |  |  |  |  |  |                                               |  |  |  |  |  |  |  |  |  |                                                                                    |  |
| En el estudio RAPID-OLE (140 pacientes) se observó un resultado similar al ECA inicial: grupo de inicio temprano 2.72 (15.2) vs grupo de inicio tardío 2.55 (12.8).                                                                                                                                                                                                                                                                                                                                                                                                                                                                                                                                                                                                                                                                                                                                                                                                                                                                                   |                     |        |       |         |        |       |        |                                           |        |                         |                     |                   |                     |         |  |         |        |                                      |        |                                           |       |      |       |       |              |       |              |      |       |        |      |       |                     |              |                     |              |       |       |        |       |       |                     |                |                     |              |       |       |      |       |      |                    |                |                     |                                                                                      |  |  |  |  |     |     |        |                   |                                                        |                     |                                                                                      |  |  |  |  |  |  |  |                                               |  |  |  |  |  |  |  |  |  |                                                                                    |  |
| La confianza en este resultado es moderada (ver tabla de resumen de resultados).                                                                                                                                                                                                                                                                                                                                                                                                                                                                                                                                                                                                                                                                                                                                                                                                                                                                                                                                                                      |                     |        |       |         |        |       |        |                                           |        |                         |                     |                   |                     |         |  |         |        |                                      |        |                                           |       |      |       |       |              |       |              |      |       |        |      |       |                     |              |                     |              |       |       |        |       |       |                     |                |                     |              |       |       |      |       |      |                    |                |                     |                                                                                      |  |  |  |  |     |     |        |                   |                                                        |                     |                                                                                      |  |  |  |  |  |  |  |                                               |  |  |  |  |  |  |  |  |  |                                                                                    |  |
| <table><tr><th rowspan="2">Study or Subgroup</th><th colspan="3">Experimental</th><th colspan="3">Control</th><th rowspan="2">Weight</th><th rowspan="2">Mean Difference<br/>IV, Fixed, 95% CI</th></tr><tr><th>Mean</th><th>SD</th><th>Total</th><th>Mean</th><th>SD</th><th>Total</th></tr><tr><td>Chapman 2015</td><td>1.4</td><td>11.1</td><td>93</td><td>2.2</td><td>11.7</td><td>87</td><td>66.4%</td><td>-0.80 [-4.14, 2.54]</td></tr><tr><td>Dirksen 2009</td><td>1.48</td><td>10.33</td><td>37</td><td>2.37</td><td>10.24</td><td>37</td><td>33.6%</td><td>-0.89 [-5.58, 3.80]</td></tr><tr><td colspan="7">Total (95% CI)</td><td>130</td><td>124</td><td>100.0%</td><td>-0.83 [-3.55, 1.89]</td></tr></table>                                                                                                                                                                                                                                                                                                                              |                     |        |       |         |        |       |        |                                           |        | Study or Subgroup       | Experimental        |                   |                     | Control |  |         | Weight | Mean Difference<br>IV, Fixed, 95% CI | Mean   | SD                                        | Total | Mean | SD    | Total | Chapman 2015 | 1.4   | 11.1         | 93   | 2.2   | 11.7   | 87   | 66.4% | -0.80 [-4.14, 2.54] | Dirksen 2009 | 1.48                | 10.33        | 37    | 2.37  | 10.24  | 37    | 33.6% | -0.89 [-5.58, 3.80] | Total (95% CI) |                     |              |       |       |      |       | 130  | 124                | 100.0%         | -0.83 [-3.55, 1.89] |  |  |  |  |  |     |     |        |                   |                                                        |                     |                                                                                      |  |  |  |  |  |  |  |                                               |  |  |  |  |  |  |  |  |  |                                                                                    |  |
| Study or Subgroup                                                                                                                                                                                                                                                                                                                                                                                                                                                                                                                                                                                                                                                                                                                                                                                                                                                                                                                                                                                                                                     | Experimental        |        |       | Control |        |       | Weight | Mean Difference<br>IV, Fixed, 95% CI      |        |                         |                     |                   |                     |         |  |         |        |                                      |        |                                           |       |      |       |       |              |       |              |      |       |        |      |       |                     |              |                     |              |       |       |        |       |       |                     |                |                     |              |       |       |      |       |      |                    |                |                     |                                                                                      |  |  |  |  |     |     |        |                   |                                                        |                     |                                                                                      |  |  |  |  |  |  |  |                                               |  |  |  |  |  |  |  |  |  |                                                                                    |  |
|                                                                                                                                                                                                                                                                                                                                                                                                                                                                                                                                                                                                                                                                                                                                                                                                                                                                                                                                                                                                                                                       | Mean                | SD     | Total | Mean    | SD     | Total |        |                                           |        |                         |                     |                   |                     |         |  |         |        |                                      |        |                                           |       |      |       |       |              |       |              |      |       |        |      |       |                     |              |                     |              |       |       |        |       |       |                     |                |                     |              |       |       |      |       |      |                    |                |                     |                                                                                      |  |  |  |  |     |     |        |                   |                                                        |                     |                                                                                      |  |  |  |  |  |  |  |                                               |  |  |  |  |  |  |  |  |  |                                                                                    |  |
| Chapman 2015                                                                                                                                                                                                                                                                                                                                                                                                                                                                                                                                                                                                                                                                                                                                                                                                                                                                                                                                                                                                                                          | 1.4                 | 11.1   | 93    | 2.2     | 11.7   | 87    | 66.4%  | -0.80 [-4.14, 2.54]                       |        |                         |                     |                   |                     |         |  |         |        |                                      |        |                                           |       |      |       |       |              |       |              |      |       |        |      |       |                     |              |                     |              |       |       |        |       |       |                     |                |                     |              |       |       |      |       |      |                    |                |                     |                                                                                      |  |  |  |  |     |     |        |                   |                                                        |                     |                                                                                      |  |  |  |  |  |  |  |                                               |  |  |  |  |  |  |  |  |  |                                                                                    |  |
| Dirksen 2009                                                                                                                                                                                                                                                                                                                                                                                                                                                                                                                                                                                                                                                                                                                                                                                                                                                                                                                                                                                                                                          | 1.48                | 10.33  | 37    | 2.37    | 10.24  | 37    | 33.6%  | -0.89 [-5.58, 3.80]                       |        |                         |                     |                   |                     |         |  |         |        |                                      |        |                                           |       |      |       |       |              |       |              |      |       |        |      |       |                     |              |                     |              |       |       |        |       |       |                     |                |                     |              |       |       |      |       |      |                    |                |                     |                                                                                      |  |  |  |  |     |     |        |                   |                                                        |                     |                                                                                      |  |  |  |  |  |  |  |                                               |  |  |  |  |  |  |  |  |  |                                                                                    |  |
| Total (95% CI)                                                                                                                                                                                                                                                                                                                                                                                                                                                                                                                                                                                                                                                                                                                                                                                                                                                                                                                                                                                                                                        |                     |        |       |         |        |       | 130    | 124                                       | 100.0% | -0.83 [-3.55, 1.89]     |                     |                   |                     |         |  |         |        |                                      |        |                                           |       |      |       |       |              |       |              |      |       |        |      |       |                     |              |                     |              |       |       |        |       |       |                     |                |                     |              |       |       |      |       |      |                    |                |                     |                                                                                      |  |  |  |  |     |     |        |                   |                                                        |                     |                                                                                      |  |  |  |  |  |  |  |                                               |  |  |  |  |  |  |  |  |  |                                                                                    |  |
| <b>Frecuencia exacerbaciones</b>                                                                                                                                                                                                                                                                                                                                                                                                                                                                                                                                                                                                                                                                                                                                                                                                                                                                                                                                                                                                                      |                     |        |       |         |        |       |        |                                           |        |                         |                     |                   |                     |         |  |         |        |                                      |        |                                           |       |      |       |       |              |       |              |      |       |        |      |       |                     |              |                     |              |       |       |        |       |       |                     |                |                     |              |       |       |      |       |      |                    |                |                     |                                                                                      |  |  |  |  |     |     |        |                   |                                                        |                     |                                                                                      |  |  |  |  |  |  |  |                                               |  |  |  |  |  |  |  |  |  |                                                                                    |  |
| En el análisis conjunto de los datos (2 ECAs, 257 pacientes), el tratamiento con alfa-1 antitripsina se asoció a un incremento significativo de la frecuencia                                                                                                                                                                                                                                                                                                                                                                                                                                                                                                                                                                                                                                                                                                                                                                                                                                                                                         |                     |        |       |         |        |       |        |                                           |        | <b>Calidad moderada</b> |                     |                   |                     |         |  |         |        |                                      |        |                                           |       |      |       |       |              |       |              |      |       |        |      |       |                     |              |                     |              |       |       |        |       |       |                     |                |                     |              |       |       |      |       |      |                    |                |                     |                                                                                      |  |  |  |  |     |     |        |                   |                                                        |                     |                                                                                      |  |  |  |  |  |  |  |                                               |  |  |  |  |  |  |  |  |  |                                                                                    |  |

| de exacerbaciones en relación a placebo aunque diferencia no fue clínicamente relevante: MD 0.29 más (0.04 más a 0.54 más).                                                                                                                                                                                                                                                                                                                                                                                                                                                                                                                                                                                                                                                                                                                                                                                         |                     |                     |       |      |         |       |        |                    |                                      |        |                                      |       |      |    |       |              |     |      |    |      |      |    |       |                   |              |      |      |    |      |      |    |      |                    |                |  |  |     |  |  |     |        |                   |                                                                                             |
|---------------------------------------------------------------------------------------------------------------------------------------------------------------------------------------------------------------------------------------------------------------------------------------------------------------------------------------------------------------------------------------------------------------------------------------------------------------------------------------------------------------------------------------------------------------------------------------------------------------------------------------------------------------------------------------------------------------------------------------------------------------------------------------------------------------------------------------------------------------------------------------------------------------------|---------------------|---------------------|-------|------|---------|-------|--------|--------------------|--------------------------------------|--------|--------------------------------------|-------|------|----|-------|--------------|-----|------|----|------|------|----|-------|-------------------|--------------|------|------|----|------|------|----|------|--------------------|----------------|--|--|-----|--|--|-----|--------|-------------------|---------------------------------------------------------------------------------------------|
| La confianza en este resultado es moderada por que el número de pacientes evaluados son escasos, generando imprecisión en este resultado.                                                                                                                                                                                                                                                                                                                                                                                                                                                                                                                                                                                                                                                                                                                                                                           |                     |                     |       |      |         |       |        |                    |                                      |        |                                      |       |      |    |       |              |     |      |    |      |      |    |       |                   |              |      |      |    |      |      |    |      |                    |                |  |  |     |  |  |     |        |                   |                                                                                             |
| <table><thead><tr><th rowspan="2">Study or Subgroup</th><th colspan="3">Alpha-1 antitrypsin</th><th colspan="3">Placebo</th><th rowspan="2">Weight</th><th rowspan="2">Mean Difference<br/>IV, Fixed, 95% CI</th></tr><tr><th>Mean</th><th>SD</th><th>Total</th><th>Mean</th><th>SD</th><th>Total</th></tr></thead><tbody><tr><td>Chapman 2015</td><td>1.7</td><td>0.92</td><td>93</td><td>1.42</td><td>0.89</td><td>87</td><td>90.1%</td><td>0.28 [0.02, 0.54]</td></tr><tr><td>Dirksen 2009</td><td>2.55</td><td>2.14</td><td>38</td><td>2.19</td><td>1.33</td><td>39</td><td>9.9%</td><td>0.36 [-0.44, 1.16]</td></tr><tr><td>Total (95% CI)</td><td></td><td></td><td>131</td><td></td><td></td><td>126</td><td>100.0%</td><td>0.29 [0.04, 0.54]</td></tr></tbody></table> <p>Heterogeneity: Chi<sup>2</sup> = 0.03, df = 1 (P = 0.85); I<sup>2</sup> = 0%<br/>Test for overall effect: Z = 2.25 (P = 0.02)</p> | Study or Subgroup   | Alpha-1 antitrypsin |       |      | Placebo |       |        | Weight             | Mean Difference<br>IV, Fixed, 95% CI | Mean   | SD                                   | Total | Mean | SD | Total | Chapman 2015 | 1.7 | 0.92 | 93 | 1.42 | 0.89 | 87 | 90.1% | 0.28 [0.02, 0.54] | Dirksen 2009 | 2.55 | 2.14 | 38 | 2.19 | 1.33 | 39 | 9.9% | 0.36 [-0.44, 1.16] | Total (95% CI) |  |  | 131 |  |  | 126 | 100.0% | 0.29 [0.04, 0.54] | <p>Mean Difference<br/>IV, Fixed, 95% CI</p> <p>Favours α-1 antitrypsin Favours placebo</p> |
| Study or Subgroup                                                                                                                                                                                                                                                                                                                                                                                                                                                                                                                                                                                                                                                                                                                                                                                                                                                                                                   |                     | Alpha-1 antitrypsin |       |      | Placebo |       |        |                    |                                      | Weight | Mean Difference<br>IV, Fixed, 95% CI |       |      |    |       |              |     |      |    |      |      |    |       |                   |              |      |      |    |      |      |    |      |                    |                |  |  |     |  |  |     |        |                   |                                                                                             |
|                                                                                                                                                                                                                                                                                                                                                                                                                                                                                                                                                                                                                                                                                                                                                                                                                                                                                                                     | Mean                | SD                  | Total | Mean | SD      | Total |        |                    |                                      |        |                                      |       |      |    |       |              |     |      |    |      |      |    |       |                   |              |      |      |    |      |      |    |      |                    |                |  |  |     |  |  |     |        |                   |                                                                                             |
| Chapman 2015                                                                                                                                                                                                                                                                                                                                                                                                                                                                                                                                                                                                                                                                                                                                                                                                                                                                                                        | 1.7                 | 0.92                | 93    | 1.42 | 0.89    | 87    | 90.1%  | 0.28 [0.02, 0.54]  |                                      |        |                                      |       |      |    |       |              |     |      |    |      |      |    |       |                   |              |      |      |    |      |      |    |      |                    |                |  |  |     |  |  |     |        |                   |                                                                                             |
| Dirksen 2009                                                                                                                                                                                                                                                                                                                                                                                                                                                                                                                                                                                                                                                                                                                                                                                                                                                                                                        | 2.55                | 2.14                | 38    | 2.19 | 1.33    | 39    | 9.9%   | 0.36 [-0.44, 1.16] |                                      |        |                                      |       |      |    |       |              |     |      |    |      |      |    |       |                   |              |      |      |    |      |      |    |      |                    |                |  |  |     |  |  |     |        |                   |                                                                                             |
| Total (95% CI)                                                                                                                                                                                                                                                                                                                                                                                                                                                                                                                                                                                                                                                                                                                                                                                                                                                                                                      |                     |                     | 131   |      |         | 126   | 100.0% | 0.29 [0.04, 0.54]  |                                      |        |                                      |       |      |    |       |              |     |      |    |      |      |    |       |                   |              |      |      |    |      |      |    |      |                    |                |  |  |     |  |  |     |        |                   |                                                                                             |
| <b>Mortalidad</b>                                                                                                                                                                                                                                                                                                                                                                                                                                                                                                                                                                                                                                                                                                                                                                                                                                                                                                   |                     |                     |       |      |         |       |        |                    |                                      |        |                                      |       |      |    |       |              |     |      |    |      |      |    |       |                   |              |      |      |    |      |      |    |      |                    |                |  |  |     |  |  |     |        |                   |                                                                                             |
| En uno de los ECAs seleccionados se reporta datos (180 pacientes) sobre mortalidad por cualquier causa. Durante los dos años de seguimiento del ECA, se observaron tres muertes (sepsis, neumonía y metástasis de cáncer de mama) en el grupo placebo y una muerte (fallo respiratorio) en el grupo de intervención con alfa-1 antitripsina.                                                                                                                                                                                                                                                                                                                                                                                                                                                                                                                                                                        | <b>Calidad baja</b> |                     |       |      |         |       |        |                    |                                      |        |                                      |       |      |    |       |              |     |      |    |      |      |    |       |                   |              |      |      |    |      |      |    |      |                    |                |  |  |     |  |  |     |        |                   |                                                                                             |
| Debido al número muy escaso de eventos se ha realizado una descripción narrativa. La confianza en los resultados es baja debido a imprecisión.                                                                                                                                                                                                                                                                                                                                                                                                                                                                                                                                                                                                                                                                                                                                                                      |                     |                     |       |      |         |       |        |                    |                                      |        |                                      |       |      |    |       |              |     |      |    |      |      |    |       |                   |              |      |      |    |      |      |    |      |                    |                |  |  |     |  |  |     |        |                   |                                                                                             |
| <b>Eventos adversos</b>                                                                                                                                                                                                                                                                                                                                                                                                                                                                                                                                                                                                                                                                                                                                                                                                                                                                                             |                     |                     |       |      |         |       |        |                    |                                      |        |                                      |       |      |    |       |              |     |      |    |      |      |    |       |                   |              |      |      |    |      |      |    |      |                    |                |  |  |     |  |  |     |        |                   |                                                                                             |
| En dos de los ECAs seleccionados (los más recientes) se reportan datos (257 pacientes) sobre eventos adversos.                                                                                                                                                                                                                                                                                                                                                                                                                                                                                                                                                                                                                                                                                                                                                                                                      | <b>Calidad baja</b> |                     |       |      |         |       |        |                    |                                      |        |                                      |       |      |    |       |              |     |      |    |      |      |    |       |                   |              |      |      |    |      |      |    |      |                    |                |  |  |     |  |  |     |        |                   |                                                                                             |
| Un ECA (Dirksen 2009; 77 pacientes) reportó de forma inconsistente (entre la publicación y el registro) los datos relacionados con los eventos adversos graves. Según los datos publicados, se informa que 10 participantes que recibieron alfa-1 antitripsina sufrieron 28 efectos indeseados graves frente a 18 participantes que recibieron placebo y sufrieron 40 efectos indeseados graves.                                                                                                                                                                                                                                                                                                                                                                                                                                                                                                                    |                     |                     |       |      |         |       |        |                    |                                      |        |                                      |       |      |    |       |              |     |      |    |      |      |    |       |                   |              |      |      |    |      |      |    |      |                    |                |  |  |     |  |  |     |        |                   |                                                                                             |
| En otro ECA (Dirksen 1999) no se reportaron efectos indeseados.                                                                                                                                                                                                                                                                                                                                                                                                                                                                                                                                                                                                                                                                                                                                                                                                                                                     |                     |                     |       |      |         |       |        |                    |                                      |        |                                      |       |      |    |       |              |     |      |    |      |      |    |       |                   |              |      |      |    |      |      |    |      |                    |                |  |  |     |  |  |     |        |                   |                                                                                             |
| En el estudio RAPID se reportaron 57 efectos indeseados graves en 28 participantes que recibieron alfa-1 antitripsina frente a 45 efectos indeseados graves en 28 participantes que recibieron placebo (sólo un efecto indeseado grave en cada grupo se consideró relacionado con el tratamiento).                                                                                                                                                                                                                                                                                                                                                                                                                                                                                                                                                                                                                  |                     |                     |       |      |         |       |        |                    |                                      |        |                                      |       |      |    |       |              |     |      |    |      |      |    |       |                   |              |      |      |    |      |      |    |      |                    |                |  |  |     |  |  |     |        |                   |                                                                                             |
| La confianza con los resultados es baja debido a imprecisión de los resultados (no es posible obtener un estimador conjunto debido a las diferencias en la forma de expresar los resultados) y a evidencia indirecta dado que los efetos expresados no corresponden a los efectos relacionados con el tratamiento.                                                                                                                                                                                                                                                                                                                                                                                                                                                                                                                                                                                                  |                     |                     |       |      |         |       |        |                    |                                      |        |                                      |       |      |    |       |              |     |      |    |      |      |    |       |                   |              |      |      |    |      |      |    |      |                    |                |  |  |     |  |  |     |        |                   |                                                                                             |
| <b>Capacidad funcional (tolerancia al ejercicio)</b>                                                                                                                                                                                                                                                                                                                                                                                                                                                                                                                                                                                                                                                                                                                                                                                                                                                                |                     |                     |       |      |         |       |        |                    |                                      |        |                                      |       |      |    |       |              |     |      |    |      |      |    |       |                   |              |      |      |    |      |      |    |      |                    |                |  |  |     |  |  |     |        |                   |                                                                                             |
| En uno de los ECAs seleccionados se reporta datos (180 pacientes; 24 meses de seguimiento) sobre la capacidad funcional sin diferencias significativas entre los grupos respecto al incremento de distancia recorrida: MD (tratamiento vs placebo): 10.8 m (SD 139.8) frente a 16.1 m (SD 101.6), P = 0.48.                                                                                                                                                                                                                                                                                                                                                                                                                                                                                                                                                                                                         | <b>Calidad baja</b> |                     |       |      |         |       |        |                    |                                      |        |                                      |       |      |    |       |              |     |      |    |      |      |    |       |                   |              |      |      |    |      |      |    |      |                    |                |  |  |     |  |  |     |        |                   |                                                                                             |
| <b>Balance entre beneficios y riesgos</b>                                                                                                                                                                                                                                                                                                                                                                                                                                                                                                                                                                                                                                                                                                                                                                                                                                                                           |                     |                     |       |      |         |       |        |                    |                                      |        |                                      |       |      |    |       |              |     |      |    |      |      |    |       |                   |              |      |      |    |      |      |    |      |                    |                |  |  |     |  |  |     |        |                   |                                                                                             |
| <b>Calidad global de la evidencia</b>                                                                                                                                                                                                                                                                                                                                                                                                                                                                                                                                                                                                                                                                                                                                                                                                                                                                               |                     |                     |       |      |         |       |        |                    |                                      |        |                                      |       |      |    |       |              |     |      |    |      |      |    |       |                   |              |      |      |    |      |      |    |      |                    |                |  |  |     |  |  |     |        |                   |                                                                                             |
| El grupo elaborador de la guía consideró como desenlace CRÍTICO para la toma de decisiones la Densidad pulmonar medida por tomografía computarizada. La confianza global basada en este desenlace es moderada. La principal limitación fue la imprecisión.                                                                                                                                                                                                                                                                                                                                                                                                                                                                                                                                                                                                                                                          |                     |                     |       |      |         |       |        |                    |                                      |        |                                      |       |      |    |       |              |     |      |    |      |      |    |       |                   |              |      |      |    |      |      |    |      |                    |                |  |  |     |  |  |     |        |                   |                                                                                             |
| <b>Valores y preferencias</b>                                                                                                                                                                                                                                                                                                                                                                                                                                                                                                                                                                                                                                                                                                                                                                                                                                                                                       |                     |                     |       |      |         |       |        |                    |                                      |        |                                      |       |      |    |       |              |     |      |    |      |      |    |       |                   |              |      |      |    |      |      |    |      |                    |                |  |  |     |  |  |     |        |                   |                                                                                             |
| No se realizó una búsqueda formal de la literatura.                                                                                                                                                                                                                                                                                                                                                                                                                                                                                                                                                                                                                                                                                                                                                                                                                                                                 |                     |                     |       |      |         |       |        |                    |                                      |        |                                      |       |      |    |       |              |     |      |    |      |      |    |       |                   |              |      |      |    |      |      |    |      |                    |                |  |  |     |  |  |     |        |                   |                                                                                             |

|                                                                                                                                                    |                                                                                                             |
|----------------------------------------------------------------------------------------------------------------------------------------------------|-------------------------------------------------------------------------------------------------------------|
| <b>Uso de recursos y costes</b>                                                                                                                    |                                                                                                             |
| No se realizó una búsqueda formal de la literatura.                                                                                                |                                                                                                             |
| <b>Recomendaciones</b>                                                                                                                             |                                                                                                             |
| En pacientes con enfisema por DAAT se sugiere el tratamiento aumentativo con el objetivo de reducir la pérdida de densidad pulmonar medida por TC. | El tratamiento aumentativo, sin embargo, no ha demostrado eficacia en síntomas o reducción de agudizaciones |

| Certainty assessment                                                           |                    |                 |                |                     |                    |                       | Nº de pacientes |         | Efecto            |                                               | Certainty        | Importancia      |
|--------------------------------------------------------------------------------|--------------------|-----------------|----------------|---------------------|--------------------|-----------------------|-----------------|---------|-------------------|-----------------------------------------------|------------------|------------------|
| Nº de estudios                                                                 | Diseño de estudio  | Riesgo de sesgo | Inconsistencia | Evidencia indirecta | Imprecisión        | Otras consideraciones | 1 Alpha-AT      | placebo | Relativo (95% CI) | Absoluto (95% CI)                             |                  |                  |
| Densidad pulmonar medida por TC (evaluado con : g/L)                           |                    |                 |                |                     |                    |                       |                 |         |                   |                                               |                  |                  |
| 3                                                                              | ensayos aleatorios | no es serio     | no es serio    | no es serio         | serio <sup>a</sup> | ninguno               | 155             | 145     | -                 | MD 0.86 más<br>(0.31 más a 1.42 más )         | ⊕⊕⊕○<br>MODERADO | CRÍTICO          |
| Volumen espiratorio forzado (1 segundo) (evaluado con : cambio del % previsto) |                    |                 |                |                     |                    |                       |                 |         |                   |                                               |                  |                  |
| 2                                                                              | ensayos aleatorios | no es serio     | no es serio    | no es serio         | serio <sup>a</sup> | ninguno               | 121             | 115     | -                 | MD 0.65 menos<br>(1.45 menos a 0.15 más )     | ⊕⊕⊕○<br>MODERADO | IMPORTANTE       |
| Capacidad de difusión de CO (evaluado con : cambio (mmol/min; kPa o %))        |                    |                 |                |                     |                    |                       |                 |         |                   |                                               |                  |                  |
| 3                                                                              | ensayos aleatorios | no es serio     | no es serio    | no es serio         | serio <sup>a</sup> | ninguno               | 159             | 154     | -                 | SMD 0.11 SD menos<br>(0.33 menos a 0.11 más ) | ⊕⊕⊕○<br>MODERADO | IMPORTANTE       |
| Calidad de vida (evaluado con : test SGRO)                                     |                    |                 |                |                     |                    |                       |                 |         |                   |                                               |                  |                  |
| 2                                                                              | ensayos aleatorios | no es serio     | no es serio    | no es serio         | serio <sup>a</sup> | ninguno               | 130             | 124     | -                 | mean 0.83 menos<br>(3.55 menos a 1.89 más )   | ⊕⊕⊕○<br>MODERADO | IMPORTANTE       |
| Número anual de exacerbaciones                                                 |                    |                 |                |                     |                    |                       |                 |         |                   |                                               |                  |                  |
| 2                                                                              | ensayos aleatorios | no es serio     | no es serio    | no es serio         | serio <sup>a</sup> | ninguno               | 131             | 126     | -                 | MD 0.29 más<br>(0.04 más a 0.54 más )         | ⊕⊕⊕○<br>MODERADO | NO ES IMPORTANTE |

CI: Intervalo de confianza ; MD: Diferencia media; SMD: Diferencia media estandarizada

Explicaciones

a. El IC95% incluye un efecto relevante y el no efecto. Número reducido de pacientes.

## Pregunta 5.

|                                                                                                                                                                                                                                                                                                                                                                                                                                                                                                                                                                                                                                                                                                                                                                                                                                                                                                                                                                                                                                                                                                                                                                                                                                                                                                                                                                                                                                                                                                                                                                                                                                                                                                                                                                                                                                                                                                                                                                                                                                                                                                                                                                                                                                                                                                                                                                                                                                                                                                                                                                                                                                                                                                                                                                                                                                                                                                                                                                                                             |                                |
|-------------------------------------------------------------------------------------------------------------------------------------------------------------------------------------------------------------------------------------------------------------------------------------------------------------------------------------------------------------------------------------------------------------------------------------------------------------------------------------------------------------------------------------------------------------------------------------------------------------------------------------------------------------------------------------------------------------------------------------------------------------------------------------------------------------------------------------------------------------------------------------------------------------------------------------------------------------------------------------------------------------------------------------------------------------------------------------------------------------------------------------------------------------------------------------------------------------------------------------------------------------------------------------------------------------------------------------------------------------------------------------------------------------------------------------------------------------------------------------------------------------------------------------------------------------------------------------------------------------------------------------------------------------------------------------------------------------------------------------------------------------------------------------------------------------------------------------------------------------------------------------------------------------------------------------------------------------------------------------------------------------------------------------------------------------------------------------------------------------------------------------------------------------------------------------------------------------------------------------------------------------------------------------------------------------------------------------------------------------------------------------------------------------------------------------------------------------------------------------------------------------------------------------------------------------------------------------------------------------------------------------------------------------------------------------------------------------------------------------------------------------------------------------------------------------------------------------------------------------------------------------------------------------------------------------------------------------------------------------------------------------|--------------------------------|
| <p><b>Pregunta para responder:</b><br/> <b>¿Se pueden retirar los corticoides inhalados en los pacientes con COPD estable?</b><br/> <b>¿Cuándo?</b></p> <p>Se identificaron dos guías de práctica clínica que realizaron una revisión sistemática para evaluar la retirada de los corticoides inhalados (CI) en pacientes con COPD estable. La guía de la ERS incluyó los resultados de 4 ECAs de al menos 6 meses de duración y en los que tras la retirada de los corticoides orales los pacientes recibieron (o siguieron en tratamiento con) un broncodilatador de larga duración. La guía de la ATS incluyó dos estudios en los que los pacientes en triple terapia se aleatorizaron a retirar el CI o seguir en triple.</p> <p>Posterior a la publicación de esta guía se identificó un ensayo clínico: FLASH (Firth 2018) aunque no se ha incluido en el análisis por tener una duración de 12 semanas.</p> <p><b>Guía práctica clínica:</b></p> <ol style="list-style-type: none"> <li>14. Chalmers JD, Laska IF, Franssen FME, et al. Withdrawal of inhaled corticosteroids in COPD: a European Respiratory Society guideline. <i>Eur Respir J</i> 2020; 55: 200035</li> <li>15. Nici L, Mammen MJ, Charbek E, et al. Pharmacologic Management of Chronic Obstructive Pulmonary Disease. An Official American Thoracic Society Clinical Practice Guideline. <i>Am J Respir Crit Care Med</i>. 2020; 201(9): e56-e69.</li> </ol> <p><b>Ensayos clínicos aleatorizados:</b></p> <ol style="list-style-type: none"> <li>1. Chapman KR, Hurst JR, Frent S-M, et al. Long-term triple therapy de-escalation to indacaterol/glycopyrronium in patients with chronic obstructive pulmonary disease (SUNSET): a randomized, double-blind, triple-dummy clinical trial. <i>Am J Respir Crit Care Med</i> 2018; 198: 329–339.</li> <li>2. Frith PA, Ashmawi S, Krishnamurthy S, Gurgun A, Hristoskova S, Pilipovic V, et al. Efficacy and safety of the direct switch to indacaterol/glycopyrronium from salmeterol/fluticasone in non-frequently exacerbating COPD patients: The FLASH randomized controlled trial. <i>Respirology</i>. 2018;23(12):1152-9.</li> <li>3. Magnussen H, Disse B, Rodriguez-Roisin R, et al. Withdrawal of inhaled glucocorticoids and exacerbations of COPD. <i>N Engl J Med</i> 2014; 371: 1285–1294.</li> <li>4. Rossi A, van der Molen T, del Olmo R, et al. INSTEAD: a randomised switch trial of indacaterol versus salmeterol/fluticasone in moderate COPD. <i>Eur Respir J</i> 2014; 44: 1548–1556.</li> <li>5. Wouters EFM, Postma DS, Fokkens B, et al. Withdrawal of fluticasone propionate from combined salmeterol/fluticasone treatment in patients with COPD causes immediate and sustained disease deterioration: a randomised controlled trial. <i>Thorax</i> 2005; 60: 480–487.</li> </ol> <p>Magnussen H, Disse B, Rodriguez-Roisin R, et al. Withdrawal of inhaled glucocorticoids and exacerbations of COPD. <i>N Engl J Med</i> 2014; 371: 1285–1294.</p> |                                |
| <p><b>Frecuencia de agudizaciones moderadas-severas</b></p>                                                                                                                                                                                                                                                                                                                                                                                                                                                                                                                                                                                                                                                                                                                                                                                                                                                                                                                                                                                                                                                                                                                                                                                                                                                                                                                                                                                                                                                                                                                                                                                                                                                                                                                                                                                                                                                                                                                                                                                                                                                                                                                                                                                                                                                                                                                                                                                                                                                                                                                                                                                                                                                                                                                                                                                                                                                                                                                                                 |                                |
| <p>Para el análisis de la frecuencia de exacerbaciones moderadas-severas se incluyeron aquellos estudios con al menos seis meses de seguimiento y que aportaran resultados de frecuencia de exacerbaciones medidas como densidad de incidencia (número de eventos por paciente y año).</p> <p>El análisis conjunto de los datos de 4 ECAs no mostró diferencias entre la retirada o mantenimiento de los CI respecto a la frecuencia de exacerbaciones: razón de tasas 1.05 (IC95% 0.97 a 1.13).</p> <p>La confianza con el estimador conjunto de los resultados es alta (ver tabla de resumen de resultados).</p>                                                                                                                                                                                                                                                                                                                                                                                                                                                                                                                                                                                                                                                                                                                                                                                                                                                                                                                                                                                                                                                                                                                                                                                                                                                                                                                                                                                                                                                                                                                                                                                                                                                                                                                                                                                                                                                                                                                                                                                                                                                                                                                                                                                                                                                                                                                                                                                          | <p><b>Calidad moderada</b></p> |



| <table><tr><th>Study or Subgroup</th><th>log[Rate Ratio]</th><th>SE</th><th>Weight</th><th>Rate Ratio<br/>IV, Random, 95% CI</th><th>Rate Ratio<br/>IV, Random, 95% CI</th></tr><tr><td>Chapman 2018 SUNSET</td><td>0.077</td><td>0.1343</td><td>9.4%</td><td>1.08 [0.83, 1.41]</td><td rowspan="5"></td></tr><tr><td>Magnussen 2014 WISDOM</td><td>0.043</td><td>0.0469</td><td>76.7%</td><td>1.04 [0.95, 1.14]</td></tr><tr><td>Rossi 2014 INSTEAD</td><td>-0.1508</td><td>0.1669</td><td>6.1%</td><td>0.86 [0.62, 1.19]</td></tr><tr><td>Wouters 2005 COSMIC</td><td>0.1823</td><td>0.1468</td><td>7.8%</td><td>1.20 [0.90, 1.60]</td></tr><tr><td>Total (95% CI)</td><td></td><td></td><td>100.0%</td><td>1.05 [0.97, 1.13]</td></tr><tr><td colspan="4">Heterogeneity: Tau² = 0.00; Chi² = 2.31, df = 3 (P = 0.51); I² = 0%</td><td colspan="2"></td></tr><tr><td colspan="4">Test for overall effect: Z = 1.10 (P = 0.27)</td><td colspan="2"></td></tr></table>                                                                                                                                                                                                                                                                                            |                       |        |                   |                                   |                                  |                                 | Study or Subgroup              | log[Rate Ratio]       | SE    | Weight            | Rate Ratio<br>IV, Random, 95% CI  | Rate Ratio<br>IV, Random, 95% CI | Chapman 2018 SUNSET             | 0.077              | 0.1343 | 9.4%              | 1.08 [0.83, 1.41]     |        | Magnussen 2014 WISDOM | 0.043             | 0.0469              | 76.7%              | 1.04 [0.95, 1.14] | Rossi 2014 INSTEAD | -0.1508 | 0.1669            | 6.1%              | 0.86 [0.62, 1.19] | Wouters 2005 COSMIC | 0.1823 | 0.1468            | 7.8%                       | 1.20 [0.90, 1.60] | Total (95% CI)    |                                |     | 100.0% | 1.05 [0.97, 1.13] | Heterogeneity: Tau² = 0.00; Chi² = 2.31, df = 3 (P = 0.51); I² = 0% |  |  |                            |  |  | Test for overall effect: Z = 1.10 (P = 0.27) |  |  |  |  |  |  |
|-------------------------------------------------------------------------------------------------------------------------------------------------------------------------------------------------------------------------------------------------------------------------------------------------------------------------------------------------------------------------------------------------------------------------------------------------------------------------------------------------------------------------------------------------------------------------------------------------------------------------------------------------------------------------------------------------------------------------------------------------------------------------------------------------------------------------------------------------------------------------------------------------------------------------------------------------------------------------------------------------------------------------------------------------------------------------------------------------------------------------------------------------------------------------------------------------------------------------------------------------------------------|-----------------------|--------|-------------------|-----------------------------------|----------------------------------|---------------------------------|--------------------------------|-----------------------|-------|-------------------|-----------------------------------|----------------------------------|---------------------------------|--------------------|--------|-------------------|-----------------------|--------|-----------------------|-------------------|---------------------|--------------------|-------------------|--------------------|---------|-------------------|-------------------|-------------------|---------------------|--------|-------------------|----------------------------|-------------------|-------------------|--------------------------------|-----|--------|-------------------|---------------------------------------------------------------------|--|--|----------------------------|--|--|----------------------------------------------|--|--|--|--|--|--|
| Study or Subgroup                                                                                                                                                                                                                                                                                                                                                                                                                                                                                                                                                                                                                                                                                                                                                                                                                                                                                                                                                                                                                                                                                                                                                                                                                                                 | log[Rate Ratio]       | SE     | Weight            | Rate Ratio<br>IV, Random, 95% CI  | Rate Ratio<br>IV, Random, 95% CI |                                 |                                |                       |       |                   |                                   |                                  |                                 |                    |        |                   |                       |        |                       |                   |                     |                    |                   |                    |         |                   |                   |                   |                     |        |                   |                            |                   |                   |                                |     |        |                   |                                                                     |  |  |                            |  |  |                                              |  |  |  |  |  |  |
| Chapman 2018 SUNSET                                                                                                                                                                                                                                                                                                                                                                                                                                                                                                                                                                                                                                                                                                                                                                                                                                                                                                                                                                                                                                                                                                                                                                                                                                               | 0.077                 | 0.1343 | 9.4%              | 1.08 [0.83, 1.41]                 |                                  |                                 |                                |                       |       |                   |                                   |                                  |                                 |                    |        |                   |                       |        |                       |                   |                     |                    |                   |                    |         |                   |                   |                   |                     |        |                   |                            |                   |                   |                                |     |        |                   |                                                                     |  |  |                            |  |  |                                              |  |  |  |  |  |  |
| Magnussen 2014 WISDOM                                                                                                                                                                                                                                                                                                                                                                                                                                                                                                                                                                                                                                                                                                                                                                                                                                                                                                                                                                                                                                                                                                                                                                                                                                             | 0.043                 | 0.0469 | 76.7%             | 1.04 [0.95, 1.14]                 |                                  |                                 |                                |                       |       |                   |                                   |                                  |                                 |                    |        |                   |                       |        |                       |                   |                     |                    |                   |                    |         |                   |                   |                   |                     |        |                   |                            |                   |                   |                                |     |        |                   |                                                                     |  |  |                            |  |  |                                              |  |  |  |  |  |  |
| Rossi 2014 INSTEAD                                                                                                                                                                                                                                                                                                                                                                                                                                                                                                                                                                                                                                                                                                                                                                                                                                                                                                                                                                                                                                                                                                                                                                                                                                                | -0.1508               | 0.1669 | 6.1%              | 0.86 [0.62, 1.19]                 |                                  |                                 |                                |                       |       |                   |                                   |                                  |                                 |                    |        |                   |                       |        |                       |                   |                     |                    |                   |                    |         |                   |                   |                   |                     |        |                   |                            |                   |                   |                                |     |        |                   |                                                                     |  |  |                            |  |  |                                              |  |  |  |  |  |  |
| Wouters 2005 COSMIC                                                                                                                                                                                                                                                                                                                                                                                                                                                                                                                                                                                                                                                                                                                                                                                                                                                                                                                                                                                                                                                                                                                                                                                                                                               | 0.1823                | 0.1468 | 7.8%              | 1.20 [0.90, 1.60]                 |                                  |                                 |                                |                       |       |                   |                                   |                                  |                                 |                    |        |                   |                       |        |                       |                   |                     |                    |                   |                    |         |                   |                   |                   |                     |        |                   |                            |                   |                   |                                |     |        |                   |                                                                     |  |  |                            |  |  |                                              |  |  |  |  |  |  |
| Total (95% CI)                                                                                                                                                                                                                                                                                                                                                                                                                                                                                                                                                                                                                                                                                                                                                                                                                                                                                                                                                                                                                                                                                                                                                                                                                                                    |                       |        | 100.0%            | 1.05 [0.97, 1.13]                 |                                  |                                 |                                |                       |       |                   |                                   |                                  |                                 |                    |        |                   |                       |        |                       |                   |                     |                    |                   |                    |         |                   |                   |                   |                     |        |                   |                            |                   |                   |                                |     |        |                   |                                                                     |  |  |                            |  |  |                                              |  |  |  |  |  |  |
| Heterogeneity: Tau² = 0.00; Chi² = 2.31, df = 3 (P = 0.51); I² = 0%                                                                                                                                                                                                                                                                                                                                                                                                                                                                                                                                                                                                                                                                                                                                                                                                                                                                                                                                                                                                                                                                                                                                                                                               |                       |        |                   |                                   |                                  |                                 |                                |                       |       |                   |                                   |                                  |                                 |                    |        |                   |                       |        |                       |                   |                     |                    |                   |                    |         |                   |                   |                   |                     |        |                   |                            |                   |                   |                                |     |        |                   |                                                                     |  |  |                            |  |  |                                              |  |  |  |  |  |  |
| Test for overall effect: Z = 1.10 (P = 0.27)                                                                                                                                                                                                                                                                                                                                                                                                                                                                                                                                                                                                                                                                                                                                                                                                                                                                                                                                                                                                                                                                                                                                                                                                                      |                       |        |                   |                                   |                                  |                                 |                                |                       |       |                   |                                   |                                  |                                 |                    |        |                   |                       |        |                       |                   |                     |                    |                   |                    |         |                   |                   |                   |                     |        |                   |                            |                   |                   |                                |     |        |                   |                                                                     |  |  |                            |  |  |                                              |  |  |  |  |  |  |
| <h3>Número de pacientes con agudizaciones moderadas-graves</h3> <p>El análisis conjunto de los datos de 2 ECAs (954 pacientes, 331 eventos) no mostró diferencias entre la retirada o mantenimiento de los CI respecto al número de pacientes con agudizaciones moderadas-graves: OR 0.84 (IC95% 0.63 a 1.14); 39 menos por 1000 (de 99 menos a 31 más).</p> <p>La confianza con el estimador conjunto de los resultados es baja (ver tabla de resumen de resultados).</p> <table><tr><th>Study or Subgroup</th><th>Retirada CI<br/>Events</th><th>Total</th><th>Control<br/>Events</th><th>Total</th><th>Weight</th><th>Odds Ratio<br/>IV, Fixed, 95% CI</th></tr><tr><td>Rossi 2014 INSTEAD</td><td>48</td><td>293</td><td>59</td><td>288</td><td>49.2%</td><td>0.76 [0.50, 1.16]</td></tr><tr><td>Wouters 2005 COSMIC</td><td>109</td><td>184</td><td>115</td><td>189</td><td>50.8%</td><td>0.94 [0.62, 1.42]</td></tr><tr><td>Total (95% CI)</td><td></td><td>477</td><td></td><td>477</td><td>100.0%</td><td>0.84 [0.63, 1.14]</td></tr><tr><td>Total events</td><td>157</td><td></td><td>174</td><td></td><td></td><td></td></tr></table> <p>Heterogeneity: Chi² = 0.47, df = 1 (P = 0.49); I² = 0%</p> <p>Test for overall effect: Z = 1.12 (P = 0.26)</p> |                       |        |                   |                                   |                                  |                                 | Study or Subgroup              | Retirada CI<br>Events | Total | Control<br>Events | Total                             | Weight                           | Odds Ratio<br>IV, Fixed, 95% CI | Rossi 2014 INSTEAD | 48     | 293               | 59                    | 288    | 49.2%                 | 0.76 [0.50, 1.16] | Wouters 2005 COSMIC | 109                | 184               | 115                | 189     | 50.8%             | 0.94 [0.62, 1.42] | Total (95% CI)    |                     | 477    |                   | 477                        | 100.0%            | 0.84 [0.63, 1.14] | Total events                   | 157 |        | 174               |                                                                     |  |  | <p><b>Calidad baja</b></p> |  |  |                                              |  |  |  |  |  |  |
| Study or Subgroup                                                                                                                                                                                                                                                                                                                                                                                                                                                                                                                                                                                                                                                                                                                                                                                                                                                                                                                                                                                                                                                                                                                                                                                                                                                 | Retirada CI<br>Events | Total  | Control<br>Events | Total                             | Weight                           | Odds Ratio<br>IV, Fixed, 95% CI |                                |                       |       |                   |                                   |                                  |                                 |                    |        |                   |                       |        |                       |                   |                     |                    |                   |                    |         |                   |                   |                   |                     |        |                   |                            |                   |                   |                                |     |        |                   |                                                                     |  |  |                            |  |  |                                              |  |  |  |  |  |  |
| Rossi 2014 INSTEAD                                                                                                                                                                                                                                                                                                                                                                                                                                                                                                                                                                                                                                                                                                                                                                                                                                                                                                                                                                                                                                                                                                                                                                                                                                                | 48                    | 293    | 59                | 288                               | 49.2%                            | 0.76 [0.50, 1.16]               |                                |                       |       |                   |                                   |                                  |                                 |                    |        |                   |                       |        |                       |                   |                     |                    |                   |                    |         |                   |                   |                   |                     |        |                   |                            |                   |                   |                                |     |        |                   |                                                                     |  |  |                            |  |  |                                              |  |  |  |  |  |  |
| Wouters 2005 COSMIC                                                                                                                                                                                                                                                                                                                                                                                                                                                                                                                                                                                                                                                                                                                                                                                                                                                                                                                                                                                                                                                                                                                                                                                                                                               | 109                   | 184    | 115               | 189                               | 50.8%                            | 0.94 [0.62, 1.42]               |                                |                       |       |                   |                                   |                                  |                                 |                    |        |                   |                       |        |                       |                   |                     |                    |                   |                    |         |                   |                   |                   |                     |        |                   |                            |                   |                   |                                |     |        |                   |                                                                     |  |  |                            |  |  |                                              |  |  |  |  |  |  |
| Total (95% CI)                                                                                                                                                                                                                                                                                                                                                                                                                                                                                                                                                                                                                                                                                                                                                                                                                                                                                                                                                                                                                                                                                                                                                                                                                                                    |                       | 477    |                   | 477                               | 100.0%                           | 0.84 [0.63, 1.14]               |                                |                       |       |                   |                                   |                                  |                                 |                    |        |                   |                       |        |                       |                   |                     |                    |                   |                    |         |                   |                   |                   |                     |        |                   |                            |                   |                   |                                |     |        |                   |                                                                     |  |  |                            |  |  |                                              |  |  |  |  |  |  |
| Total events                                                                                                                                                                                                                                                                                                                                                                                                                                                                                                                                                                                                                                                                                                                                                                                                                                                                                                                                                                                                                                                                                                                                                                                                                                                      | 157                   |        | 174               |                                   |                                  |                                 |                                |                       |       |                   |                                   |                                  |                                 |                    |        |                   |                       |        |                       |                   |                     |                    |                   |                    |         |                   |                   |                   |                     |        |                   |                            |                   |                   |                                |     |        |                   |                                                                     |  |  |                            |  |  |                                              |  |  |  |  |  |  |
| <h3>Número de pacientes con agudizaciones graves</h3> <p>Un ECAs (581 pacientes, 3 eventos) no mostró diferencias entre la retirada o mantenimiento de los CI respecto al número de pacientes con agudizaciones moderadas-graves: OR 0.49 (IC95% 0.04 a 5.43); 4 menos por 1000 (de 7 menos a 30 más).</p> <p>La confianza con el estimador conjunto de los resultados es baja (ver tabla de resumen de resultados).</p> <table><tr><th>Study or Subgroup</th><th>Retirada CI<br/>Events</th><th>Total</th><th>Control<br/>Events</th><th>Total</th><th>Weight</th><th>Odds Ratio<br/>IV, Fixed, 95% CI</th></tr><tr><td>Rossi 2014 INSTEAD</td><td>1</td><td>293</td><td>2</td><td>288</td><td>100.0%</td><td>0.49 [0.04, 5.43]</td></tr><tr><td>Total (95% CI)</td><td></td><td>293</td><td></td><td>288</td><td>100.0%</td><td>0.49 [0.04, 5.43]</td></tr><tr><td>Total events</td><td>1</td><td></td><td>2</td><td></td><td></td><td></td></tr></table> <p>Heterogeneity: Not applicable</p> <p>Test for overall effect: Z = 0.58 (P = 0.56)</p>                                                                                                                                                                                                              |                       |        |                   |                                   |                                  |                                 | Study or Subgroup              | Retirada CI<br>Events | Total | Control<br>Events | Total                             | Weight                           | Odds Ratio<br>IV, Fixed, 95% CI | Rossi 2014 INSTEAD | 1      | 293               | 2                     | 288    | 100.0%                | 0.49 [0.04, 5.43] | Total (95% CI)      |                    | 293               |                    | 288     | 100.0%            | 0.49 [0.04, 5.43] | Total events      | 1                   |        | 2                 |                            |                   |                   | <p><b>Calidad muy baja</b></p> |     |        |                   |                                                                     |  |  |                            |  |  |                                              |  |  |  |  |  |  |
| Study or Subgroup                                                                                                                                                                                                                                                                                                                                                                                                                                                                                                                                                                                                                                                                                                                                                                                                                                                                                                                                                                                                                                                                                                                                                                                                                                                 | Retirada CI<br>Events | Total  | Control<br>Events | Total                             | Weight                           | Odds Ratio<br>IV, Fixed, 95% CI |                                |                       |       |                   |                                   |                                  |                                 |                    |        |                   |                       |        |                       |                   |                     |                    |                   |                    |         |                   |                   |                   |                     |        |                   |                            |                   |                   |                                |     |        |                   |                                                                     |  |  |                            |  |  |                                              |  |  |  |  |  |  |
| Rossi 2014 INSTEAD                                                                                                                                                                                                                                                                                                                                                                                                                                                                                                                                                                                                                                                                                                                                                                                                                                                                                                                                                                                                                                                                                                                                                                                                                                                | 1                     | 293    | 2                 | 288                               | 100.0%                           | 0.49 [0.04, 5.43]               |                                |                       |       |                   |                                   |                                  |                                 |                    |        |                   |                       |        |                       |                   |                     |                    |                   |                    |         |                   |                   |                   |                     |        |                   |                            |                   |                   |                                |     |        |                   |                                                                     |  |  |                            |  |  |                                              |  |  |  |  |  |  |
| Total (95% CI)                                                                                                                                                                                                                                                                                                                                                                                                                                                                                                                                                                                                                                                                                                                                                                                                                                                                                                                                                                                                                                                                                                                                                                                                                                                    |                       | 293    |                   | 288                               | 100.0%                           | 0.49 [0.04, 5.43]               |                                |                       |       |                   |                                   |                                  |                                 |                    |        |                   |                       |        |                       |                   |                     |                    |                   |                    |         |                   |                   |                   |                     |        |                   |                            |                   |                   |                                |     |        |                   |                                                                     |  |  |                            |  |  |                                              |  |  |  |  |  |  |
| Total events                                                                                                                                                                                                                                                                                                                                                                                                                                                                                                                                                                                                                                                                                                                                                                                                                                                                                                                                                                                                                                                                                                                                                                                                                                                      | 1                     |        | 2                 |                                   |                                  |                                 |                                |                       |       |                   |                                   |                                  |                                 |                    |        |                   |                       |        |                       |                   |                     |                    |                   |                    |         |                   |                   |                   |                     |        |                   |                            |                   |                   |                                |     |        |                   |                                                                     |  |  |                            |  |  |                                              |  |  |  |  |  |  |
| <h3>Tiempo hasta la primera exacerbación moderada o grave</h3> <p>El análisis conjunto de los datos de 3 ECAs con al menos seis meses de seguimiento no mostró diferencias entre la retirada o mantenimiento de los CI respecto al tiempo hasta la primera exacerbación moderada o grave: HR 1.05 (IC95% 0.94 a 1.16).</p> <p>La confianza con el estimador conjunto de los resultados es alta (ver tabla de resumen de resultados).</p> <table><tr><th>Study or Subgroup</th><th>log[Hazard Ratio]</th><th>SE</th><th>Weight</th><th>Hazard Ratio<br/>IV, Fixed, 95% CI</th></tr><tr><td>Chapman 2018 SUNSET</td><td>0.1044</td><td>0.1362</td><td>15.6%</td><td>1.11 [0.85, 1.45]</td></tr><tr><td>Magnussen 2014 WISDOM</td><td>0.0583</td><td>0.0613</td><td>76.9%</td><td>1.06 [0.94, 1.20]</td></tr><tr><td>Rossi 2014 INSTEAD</td><td>-0.2231</td><td>0.1968</td><td>7.5%</td><td>0.80 [0.54, 1.18]</td></tr><tr><td>Total (95% CI)</td><td></td><td></td><td>100.0%</td><td>1.05 [0.94, 1.16]</td></tr></table> <p>Heterogeneity: Chi² = 2.09, df = 2 (P = 0.35); I² = 4%</p> <p>Test for overall effect: Z = 0.83 (P = 0.41)</p>                                                                                                                         |                       |        |                   |                                   |                                  |                                 | Study or Subgroup              | log[Hazard Ratio]     | SE    | Weight            | Hazard Ratio<br>IV, Fixed, 95% CI | Chapman 2018 SUNSET              | 0.1044                          | 0.1362             | 15.6%  | 1.11 [0.85, 1.45] | Magnussen 2014 WISDOM | 0.0583 | 0.0613                | 76.9%             | 1.06 [0.94, 1.20]   | Rossi 2014 INSTEAD | -0.2231           | 0.1968             | 7.5%    | 0.80 [0.54, 1.18] | Total (95% CI)    |                   |                     | 100.0% | 1.05 [0.94, 1.16] | <p><b>Calidad alta</b></p> |                   |                   |                                |     |        |                   |                                                                     |  |  |                            |  |  |                                              |  |  |  |  |  |  |
| Study or Subgroup                                                                                                                                                                                                                                                                                                                                                                                                                                                                                                                                                                                                                                                                                                                                                                                                                                                                                                                                                                                                                                                                                                                                                                                                                                                 | log[Hazard Ratio]     | SE     | Weight            | Hazard Ratio<br>IV, Fixed, 95% CI |                                  |                                 |                                |                       |       |                   |                                   |                                  |                                 |                    |        |                   |                       |        |                       |                   |                     |                    |                   |                    |         |                   |                   |                   |                     |        |                   |                            |                   |                   |                                |     |        |                   |                                                                     |  |  |                            |  |  |                                              |  |  |  |  |  |  |
| Chapman 2018 SUNSET                                                                                                                                                                                                                                                                                                                                                                                                                                                                                                                                                                                                                                                                                                                                                                                                                                                                                                                                                                                                                                                                                                                                                                                                                                               | 0.1044                | 0.1362 | 15.6%             | 1.11 [0.85, 1.45]                 |                                  |                                 |                                |                       |       |                   |                                   |                                  |                                 |                    |        |                   |                       |        |                       |                   |                     |                    |                   |                    |         |                   |                   |                   |                     |        |                   |                            |                   |                   |                                |     |        |                   |                                                                     |  |  |                            |  |  |                                              |  |  |  |  |  |  |
| Magnussen 2014 WISDOM                                                                                                                                                                                                                                                                                                                                                                                                                                                                                                                                                                                                                                                                                                                                                                                                                                                                                                                                                                                                                                                                                                                                                                                                                                             | 0.0583                | 0.0613 | 76.9%             | 1.06 [0.94, 1.20]                 |                                  |                                 |                                |                       |       |                   |                                   |                                  |                                 |                    |        |                   |                       |        |                       |                   |                     |                    |                   |                    |         |                   |                   |                   |                     |        |                   |                            |                   |                   |                                |     |        |                   |                                                                     |  |  |                            |  |  |                                              |  |  |  |  |  |  |
| Rossi 2014 INSTEAD                                                                                                                                                                                                                                                                                                                                                                                                                                                                                                                                                                                                                                                                                                                                                                                                                                                                                                                                                                                                                                                                                                                                                                                                                                                | -0.2231               | 0.1968 | 7.5%              | 0.80 [0.54, 1.18]                 |                                  |                                 |                                |                       |       |                   |                                   |                                  |                                 |                    |        |                   |                       |        |                       |                   |                     |                    |                   |                    |         |                   |                   |                   |                     |        |                   |                            |                   |                   |                                |     |        |                   |                                                                     |  |  |                            |  |  |                                              |  |  |  |  |  |  |
| Total (95% CI)                                                                                                                                                                                                                                                                                                                                                                                                                                                                                                                                                                                                                                                                                                                                                                                                                                                                                                                                                                                                                                                                                                                                                                                                                                                    |                       |        | 100.0%            | 1.05 [0.94, 1.16]                 |                                  |                                 |                                |                       |       |                   |                                   |                                  |                                 |                    |        |                   |                       |        |                       |                   |                     |                    |                   |                    |         |                   |                   |                   |                     |        |                   |                            |                   |                   |                                |     |        |                   |                                                                     |  |  |                            |  |  |                                              |  |  |  |  |  |  |
| <h3>Mortalidad</h3> <p>El análisis conjunto de los datos (3 ECAs; 4119 pacientes, 92 eventos) no mostró diferencias significativas entre la retirada o mantenimiento de los CI</p>                                                                                                                                                                                                                                                                                                                                                                                                                                                                                                                                                                                                                                                                                                                                                                                                                                                                                                                                                                                                                                                                                |                       |        |                   |                                   |                                  |                                 | <p><b>Calidad moderada</b></p> |                       |       |                   |                                   |                                  |                                 |                    |        |                   |                       |        |                       |                   |                     |                    |                   |                    |         |                   |                   |                   |                     |        |                   |                            |                   |                   |                                |     |        |                   |                                                                     |  |  |                            |  |  |                                              |  |  |  |  |  |  |

respecto a la mortalidad por cualquier causa: OR 1.05 (IC95% 0.69 a 1.58); 1 más por 1000 (de 7 menos a 12 más).

La confianza con el estimador conjunto de los resultados es moderada (ver tabla de resumen de resultados).

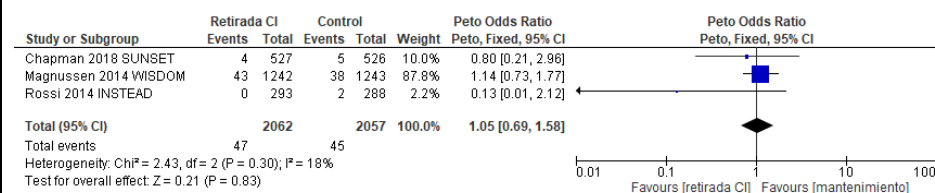

### Función pulmonar - FEV<sub>1</sub>

El análisis conjunto de los datos (3 ECAs; 2007 pacientes) mostró una reducción significativa de la FEV<sub>1</sub> favorable al mantenimiento de los CI: MD 26.80 menos (47.08 menos a 6.52 menos).

La confianza con el estimador conjunto de los resultados es alta (ver tabla de resumen de resultados).

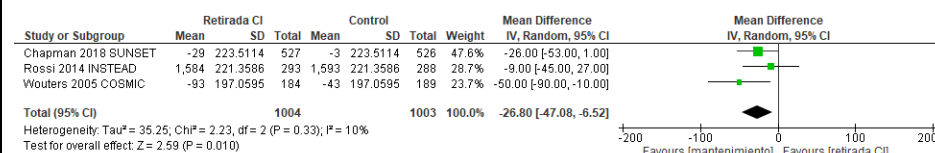

**Calidad alta**

### Efectos indeseados

En el análisis conjunto de los datos (3 ECAs, 4119 pacientes, 2915 eventos) no mostró diferencias significativas entre la retirada o mantenimiento de los CI respecto a los efectos indeseados: OR 0.90 (IC95% 0.71 a 1.13); 22 menos por 1000 (de 75 menos a 24 más).

La confianza con el estimador conjunto de los resultados es moderada (ver tabla de resumen de resultados).

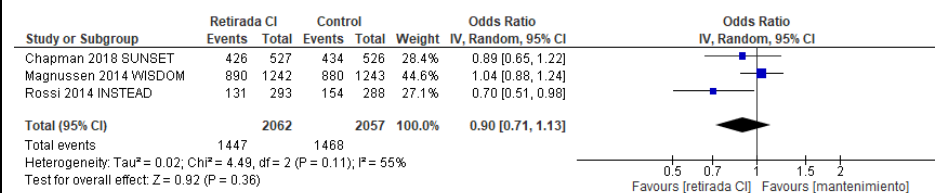

**Calidad moderada**

### Incidencia de neumonía

En el análisis conjunto de los datos (3 ECAs, 4119 pacientes, 157 eventos) no mostró diferencias significativas entre la retirada o mantenimiento de los CI respecto a la incidencia de neumonía: OR 0.89 (IC95% 0.64 a 1.22); 4 menos por 1000 (de 14 menos a 8 más).

La confianza con el estimador conjunto de los resultados es baja (ver tabla de resumen de resultados).

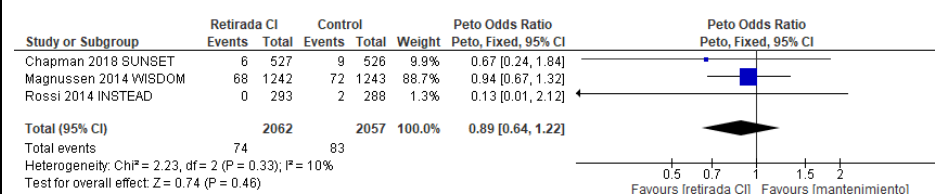

**Calidad baja**

| <b>Calidad de vida</b>                                                                                                                                                                                                                                                                                                                                                                                                                                                                                                                                                                                                                                                                                                                                                                                                                                                                                                                                                                                                                                                                                                                                                                                                                                                                                                                                                                                                                                                                                                              |             |         |       |         |         |       |        |                    |                                       | <b>Calidad alta</b>          |                   |             |  |  |         |  |  |        |                 |  |      |    |       |      |    |       |                    |                                       |                     |    |        |     |      |        |     |       |      |              |                       |      |         |      |       |         |      |       |      |              |                    |      |         |     |      |         |     |       |       |               |                     |      |         |     |     |         |     |       |      |               |                |  |  |      |  |  |      |        |      |
|-------------------------------------------------------------------------------------------------------------------------------------------------------------------------------------------------------------------------------------------------------------------------------------------------------------------------------------------------------------------------------------------------------------------------------------------------------------------------------------------------------------------------------------------------------------------------------------------------------------------------------------------------------------------------------------------------------------------------------------------------------------------------------------------------------------------------------------------------------------------------------------------------------------------------------------------------------------------------------------------------------------------------------------------------------------------------------------------------------------------------------------------------------------------------------------------------------------------------------------------------------------------------------------------------------------------------------------------------------------------------------------------------------------------------------------------------------------------------------------------------------------------------------------|-------------|---------|-------|---------|---------|-------|--------|--------------------|---------------------------------------|------------------------------|-------------------|-------------|--|--|---------|--|--|--------|-----------------|--|------|----|-------|------|----|-------|--------------------|---------------------------------------|---------------------|----|--------|-----|------|--------|-----|-------|------|--------------|-----------------------|------|---------|------|-------|---------|------|-------|------|--------------|--------------------|------|---------|-----|------|---------|-----|-------|-------|---------------|---------------------|------|---------|-----|-----|---------|-----|-------|------|---------------|----------------|--|--|------|--|--|------|--------|------|
| <p>En el análisis conjunto de los datos (4 ECAs) mostró una mayor puntuación en la escala SGRQ de calidad de vida (indicando limitaciones más importantes) en el grupo de retirada de los CI: MD 1.05 puntos más; IC95% 0.31 a 1.79 más.</p> <p>La confianza con el estimador conjunto de los resultados es alta (ver tabla de resumen de resultados).</p>                                                                                                                                                                                                                                                                                                                                                                                                                                                                                                                                                                                                                                                                                                                                                                                                                                                                                                                                                                                                                                                                                                                                                                          |             |         |       |         |         |       |        |                    |                                       |                              |                   |             |  |  |         |  |  |        |                 |  |      |    |       |      |    |       |                    |                                       |                     |    |        |     |      |        |     |       |      |              |                       |      |         |      |       |         |      |       |      |              |                    |      |         |     |      |         |     |       |       |               |                     |      |         |     |     |         |     |       |      |               |                |  |  |      |  |  |      |        |      |
| <table><thead><tr><th rowspan="2">Study or Subgroup</th><th colspan="3">Retirada CI</th><th colspan="3">Control</th><th rowspan="2">Weight</th><th colspan="2">Mean Difference</th></tr><tr><th>Mean</th><th>SD</th><th>Total</th><th>Mean</th><th>SD</th><th>Total</th><th>IV, Random, 95% CI</th><th>Mean Difference<br/>IV, Random, 95% CI</th></tr></thead><tbody><tr><td>Chapman 2018 SUNSET</td><td>-1</td><td>9.3242</td><td>456</td><td>-2.4</td><td>9.3242</td><td>472</td><td>38.2%</td><td>1.40</td><td>[0.20, 2.60]</td></tr><tr><td>Magnussen 2014 WISDOM</td><td>1.15</td><td>13.8974</td><td>1011</td><td>-0.07</td><td>13.8974</td><td>1016</td><td>37.5%</td><td>1.22</td><td>[0.01, 2.43]</td></tr><tr><td>Rossi 2014 INSTEAD</td><td>33.1</td><td>11.7367</td><td>238</td><td>33.5</td><td>11.7367</td><td>242</td><td>12.5%</td><td>-0.40</td><td>[-2.50, 1.70]</td></tr><tr><td>Wouters 2005 COSMIC</td><td>3.29</td><td>10.6213</td><td>184</td><td>2.4</td><td>10.6213</td><td>189</td><td>11.8%</td><td>0.89</td><td>[-1.27, 3.05]</td></tr><tr><td>Total (95% CI)</td><td></td><td></td><td>1889</td><td></td><td></td><td>1919</td><td>100.0%</td><td>1.05</td><td>[0.31, 1.79]</td></tr></tbody></table> <p>Heterogeneity: Tau<sup>2</sup> = 0.00; Chi<sup>2</sup> = 2.26, df = 3 (P = 0.52); I<sup>2</sup> = 0%<br/>Test for overall effect: Z = 2.77 (P = 0.006)</p> 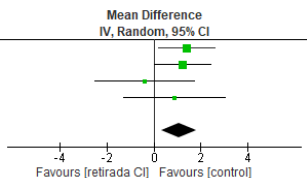 <p>Favours [retirada CI] Favours [control]</p> |             |         |       |         |         |       |        |                    |                                       |                              | Study or Subgroup | Retirada CI |  |  | Control |  |  | Weight | Mean Difference |  | Mean | SD | Total | Mean | SD | Total | IV, Random, 95% CI | Mean Difference<br>IV, Random, 95% CI | Chapman 2018 SUNSET | -1 | 9.3242 | 456 | -2.4 | 9.3242 | 472 | 38.2% | 1.40 | [0.20, 2.60] | Magnussen 2014 WISDOM | 1.15 | 13.8974 | 1011 | -0.07 | 13.8974 | 1016 | 37.5% | 1.22 | [0.01, 2.43] | Rossi 2014 INSTEAD | 33.1 | 11.7367 | 238 | 33.5 | 11.7367 | 242 | 12.5% | -0.40 | [-2.50, 1.70] | Wouters 2005 COSMIC | 3.29 | 10.6213 | 184 | 2.4 | 10.6213 | 189 | 11.8% | 0.89 | [-1.27, 3.05] | Total (95% CI) |  |  | 1889 |  |  | 1919 | 100.0% | 1.05 |
| Study or Subgroup                                                                                                                                                                                                                                                                                                                                                                                                                                                                                                                                                                                                                                                                                                                                                                                                                                                                                                                                                                                                                                                                                                                                                                                                                                                                                                                                                                                                                                                                                                                   | Retirada CI |         |       | Control |         |       | Weight | Mean Difference    |                                       |                              |                   |             |  |  |         |  |  |        |                 |  |      |    |       |      |    |       |                    |                                       |                     |    |        |     |      |        |     |       |      |              |                       |      |         |      |       |         |      |       |      |              |                    |      |         |     |      |         |     |       |       |               |                     |      |         |     |     |         |     |       |      |               |                |  |  |      |  |  |      |        |      |
|                                                                                                                                                                                                                                                                                                                                                                                                                                                                                                                                                                                                                                                                                                                                                                                                                                                                                                                                                                                                                                                                                                                                                                                                                                                                                                                                                                                                                                                                                                                                     | Mean        | SD      | Total | Mean    | SD      | Total |        | IV, Random, 95% CI | Mean Difference<br>IV, Random, 95% CI |                              |                   |             |  |  |         |  |  |        |                 |  |      |    |       |      |    |       |                    |                                       |                     |    |        |     |      |        |     |       |      |              |                       |      |         |      |       |         |      |       |      |              |                    |      |         |     |      |         |     |       |       |               |                     |      |         |     |     |         |     |       |      |               |                |  |  |      |  |  |      |        |      |
| Chapman 2018 SUNSET                                                                                                                                                                                                                                                                                                                                                                                                                                                                                                                                                                                                                                                                                                                                                                                                                                                                                                                                                                                                                                                                                                                                                                                                                                                                                                                                                                                                                                                                                                                 | -1          | 9.3242  | 456   | -2.4    | 9.3242  | 472   | 38.2%  | 1.40               | [0.20, 2.60]                          |                              |                   |             |  |  |         |  |  |        |                 |  |      |    |       |      |    |       |                    |                                       |                     |    |        |     |      |        |     |       |      |              |                       |      |         |      |       |         |      |       |      |              |                    |      |         |     |      |         |     |       |       |               |                     |      |         |     |     |         |     |       |      |               |                |  |  |      |  |  |      |        |      |
| Magnussen 2014 WISDOM                                                                                                                                                                                                                                                                                                                                                                                                                                                                                                                                                                                                                                                                                                                                                                                                                                                                                                                                                                                                                                                                                                                                                                                                                                                                                                                                                                                                                                                                                                               | 1.15        | 13.8974 | 1011  | -0.07   | 13.8974 | 1016  | 37.5%  | 1.22               | [0.01, 2.43]                          |                              |                   |             |  |  |         |  |  |        |                 |  |      |    |       |      |    |       |                    |                                       |                     |    |        |     |      |        |     |       |      |              |                       |      |         |      |       |         |      |       |      |              |                    |      |         |     |      |         |     |       |       |               |                     |      |         |     |     |         |     |       |      |               |                |  |  |      |  |  |      |        |      |
| Rossi 2014 INSTEAD                                                                                                                                                                                                                                                                                                                                                                                                                                                                                                                                                                                                                                                                                                                                                                                                                                                                                                                                                                                                                                                                                                                                                                                                                                                                                                                                                                                                                                                                                                                  | 33.1        | 11.7367 | 238   | 33.5    | 11.7367 | 242   | 12.5%  | -0.40              | [-2.50, 1.70]                         |                              |                   |             |  |  |         |  |  |        |                 |  |      |    |       |      |    |       |                    |                                       |                     |    |        |     |      |        |     |       |      |              |                       |      |         |      |       |         |      |       |      |              |                    |      |         |     |      |         |     |       |       |               |                     |      |         |     |     |         |     |       |      |               |                |  |  |      |  |  |      |        |      |
| Wouters 2005 COSMIC                                                                                                                                                                                                                                                                                                                                                                                                                                                                                                                                                                                                                                                                                                                                                                                                                                                                                                                                                                                                                                                                                                                                                                                                                                                                                                                                                                                                                                                                                                                 | 3.29        | 10.6213 | 184   | 2.4     | 10.6213 | 189   | 11.8%  | 0.89               | [-1.27, 3.05]                         |                              |                   |             |  |  |         |  |  |        |                 |  |      |    |       |      |    |       |                    |                                       |                     |    |        |     |      |        |     |       |      |              |                       |      |         |      |       |         |      |       |      |              |                    |      |         |     |      |         |     |       |       |               |                     |      |         |     |     |         |     |       |      |               |                |  |  |      |  |  |      |        |      |
| Total (95% CI)                                                                                                                                                                                                                                                                                                                                                                                                                                                                                                                                                                                                                                                                                                                                                                                                                                                                                                                                                                                                                                                                                                                                                                                                                                                                                                                                                                                                                                                                                                                      |             |         | 1889  |         |         | 1919  | 100.0% | 1.05               | [0.31, 1.79]                          |                              |                   |             |  |  |         |  |  |        |                 |  |      |    |       |      |    |       |                    |                                       |                     |    |        |     |      |        |     |       |      |              |                       |      |         |      |       |         |      |       |      |              |                    |      |         |     |      |         |     |       |       |               |                     |      |         |     |     |         |     |       |      |               |                |  |  |      |  |  |      |        |      |
| <b>ANÁLISIS SUBGRUPOS - Frecuencia de agudizaciones moderadas-graves</b>                                                                                                                                                                                                                                                                                                                                                                                                                                                                                                                                                                                                                                                                                                                                                                                                                                                                                                                                                                                                                                                                                                                                                                                                                                                                                                                                                                                                                                                            |             |         |       |         |         |       |        |                    |                                       | <b>Calidad moderada-baja</b> |                   |             |  |  |         |  |  |        |                 |  |      |    |       |      |    |       |                    |                                       |                     |    |        |     |      |        |     |       |      |              |                       |      |         |      |       |         |      |       |      |              |                    |      |         |     |      |         |     |       |       |               |                     |      |         |     |     |         |     |       |      |               |                |  |  |      |  |  |      |        |      |
| <p>Para el análisis de los subgrupos por frecuencia de exacerbaciones moderadas-graves se incluyeron dos ECAs con al menos seis meses de seguimiento y que aportaran resultados de densidad de incidencia según el recuento de eosinófilos en sangre al inicio del estudio, con diferentes dinteles según resultados de los estudios.</p> <p>En los pacientes con un recuento de eosinófilos en sangre al inicio del estudio <math>\geq 300</math> células por <math>\mu\text{L}</math> la retirada de los CI se asociaron a un aumento significativo de las exacerbaciones moderadas-graves: razón de tasas 1.63 (IC95% 1.24 a 2.14). El efecto fue parecido aunque menos marcado en los pacientes con un recuento de eosinófilos basales en sangre <math>\geq 2\%</math>, razón de tasas 1.22 (IC95% 1.05 a 1.42).</p> <p>Para el resto de subgrupos con niveles bajos de eosinófilos, el análisis conjunto de los datos no mostró diferencias entre la retirada o mantenimiento de los CI respecto a la frecuencia de exacerbaciones moderadas-graves.</p> <p>La calidad fue moderada- baja (ver tabla de resumen de resultados).</p>                                                                                                                                                                                                                                                                                                                                                                                            |             |         |       |         |         |       |        |                    |                                       |                              |                   |             |  |  |         |  |  |        |                 |  |      |    |       |      |    |       |                    |                                       |                     |    |        |     |      |        |     |       |      |              |                       |      |         |      |       |         |      |       |      |              |                    |      |         |     |      |         |     |       |       |               |                     |      |         |     |     |         |     |       |      |               |                |  |  |      |  |  |      |        |      |

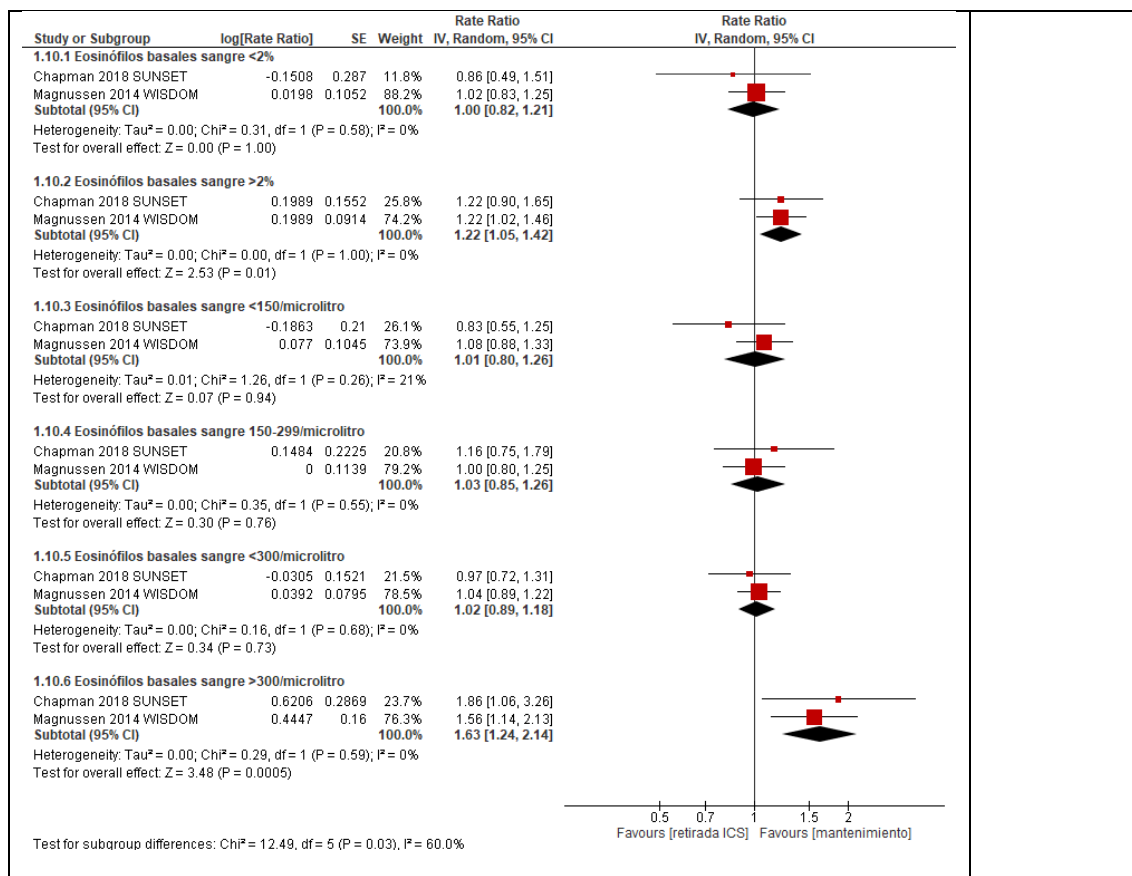

## Balance entre beneficios y riesgos

## Calidad global de la evidencia

El grupo elaborador de la guía consideró como desenlace CRÍTICO para la toma de decisiones frecuencia de agudizaciones. Los demás desenlaces se consideraron como importantes.

La recomendación principal se basó en los resultados conjuntos de 4 estudios que evaluaron la frecuencia de agudizaciones con una confianza moderada. No se detectó heterogeneidad significativa en los resultados globales de los diferentes estudios, sin embargo, los estudios que realizaron un análisis de subgrupo mostraron una variabilidad importante de la frecuencia de agudizaciones según la determinación de eosinófilos en sangre.

Estas diferencias en los análisis de subgrupo justificaron una recomendación específica para los pacientes con >300 eosinófilos/microlitro. Dos estudios mostraron un resultado preciso favorable al mantenimiento de los corticoesteroides con una confianza moderada en el estimador del efecto. La limitación principal fue que la aleatorización no se estratificó según este factor y que el análisis de subgrupos en uno de los dos estudios no fue predeterminado (post-hoc).

## Valores y preferencias

No se realizó una búsqueda formal de la literatura.

## Uso de recursos y costes

No se realizó una búsqueda formal de la literatura.

## Recomendaciones

- Considerar la retirada de CI en pacientes con agudizaciones infrecuentes (0-1 moderada el año previo) y < 300 eosinófilos/mm<sup>3</sup>
- Se recomienda no retirar los CI en pacientes agudizadores eosinofílicos

**Especificaciones:**

Tras la retirada se debe continuar con un tratamiento con broncodilatadores de larga duración.

Pregunta: Retirada CI comparado con Mantenimiento para EPOC

| Certainty assessment                                                                                              |                    |                 |                    |                     |                          |                       | Nº de pacientes   |                   | Efecto                            |                                                     | Certainty        | Importancia |
|-------------------------------------------------------------------------------------------------------------------|--------------------|-----------------|--------------------|---------------------|--------------------------|-----------------------|-------------------|-------------------|-----------------------------------|-----------------------------------------------------|------------------|-------------|
| Nº de estudios                                                                                                    | Diseño de estudio  | Riesgo de sesgo | Inconsistencia     | Evidencia indirecta | Imprecisión              | Otras consideraciones | Retirada CI       | Mantenimiento     | Relativo (95% CI)                 | Absoluto (95% CI)                                   |                  |             |
| Frecuencia exacerbaciones moderadas-graves                                                                        |                    |                 |                    |                     |                          |                       |                   |                   |                                   |                                                     |                  |             |
| 4                                                                                                                 | ensayos aleatorios | no es serio     | serio <sup>a</sup> | no es serio         | no es serio              | ninguno               |                   | -                 | Razón de tasas 1.05 (0.97 a 1.13) |                                                     | ⊕⊕⊕○<br>MODERADO | CRÍTICA     |
| Número de pacientes con al menos una exacerbación moderada-grave                                                  |                    |                 |                    |                     |                          |                       |                   |                   |                                   |                                                     |                  |             |
| 2                                                                                                                 | ensayos aleatorios | no es serio     | no es serio        | serio <sup>b</sup>  | serio <sup>c</sup>       | ninguno               | 157/477 (32.9%)   | 174/477 (36.5%)   | OR 0.84 (0.63 a 1.14)             | 39 menos por 1000 (de 99 menos a 31 más )           | ⊕⊕○○<br>BAJA     | IMPORTANTE  |
| Número de pacientes con al menos una exacerbación grave                                                           |                    |                 |                    |                     |                          |                       |                   |                   |                                   |                                                     |                  |             |
| 1                                                                                                                 | ensayos aleatorios | no es serio     | no es serio        | serio <sup>b</sup>  | muy serio <sup>c,d</sup> | ninguno               | 1/293 (0.3%)      | 2/288 (0.7%)      | OR 0.49 (0.04 a 5.43)             | 4 menos por 1000 (de 7 menos a 30 más )             | ⊕○○○<br>MUY BAJA | IMPORTANTE  |
| Tiempo hasta la primera exacerbación moderada-grave                                                               |                    |                 |                    |                     |                          |                       |                   |                   |                                   |                                                     |                  |             |
| 3                                                                                                                 | ensayos aleatorios | no es serio     | no es serio        | no es serio         | no es serio              | ninguno               |                   |                   | HR 1.05 (0.94 a 1.16)             | 1 menos por 1000 (de 1 menos a 1 menos )            | ⊕⊕⊕⊕<br>ALTA     | IMPORTANTE  |
| Mortalidad                                                                                                        |                    |                 |                    |                     |                          |                       |                   |                   |                                   |                                                     |                  |             |
| 3                                                                                                                 | ensayos aleatorios | no es serio     | no es serio        | no es serio         | serio <sup>c</sup>       | ninguno               | 47/2062 (2.3%)    | 45/2057 (2.2%)    | OR 1.05 (0.69 a 1.58)             | 1 más por 1000 (de 7 menos a 12 más )               | ⊕⊕⊕○<br>MODERADO | IMPORTANTE  |
| FEV1                                                                                                              |                    |                 |                    |                     |                          |                       |                   |                   |                                   |                                                     |                  |             |
| 3                                                                                                                 | ensayos aleatorios | no es serio     | no es serio        | no es serio         | no es serio <sup>e</sup> | ninguno               | 1004              | 1003              | -                                 | MD 26.8 menos (47.08 menos a 652 menos )            | ⊕⊕⊕⊕<br>ALTA     | IMPORTANTE  |
| Calidad de vida (evaluado con : SGRQ - St. George's Respiratory Questionnaire: a más puntuación más limitaciones) |                    |                 |                    |                     |                          |                       |                   |                   |                                   |                                                     |                  |             |
| 4                                                                                                                 | ensayos aleatorios | no es serio     | no es serio        | no es serio         | no es serio              | ninguno               | 1889              | 1919              | -                                 | MD 1.05 más alto. (0.31 más alto. a 1.79 más alto.) | ⊕⊕⊕⊕<br>ALTA     | IMPORTANTE  |
| Efectos indeseados                                                                                                |                    |                 |                    |                     |                          |                       |                   |                   |                                   |                                                     |                  |             |
| 3                                                                                                                 | ensayos aleatorios | no es serio     | no es serio        | no es serio         | serio <sup>c</sup>       | ninguno               | 1447/2062 (70.2%) | 1468/2057 (71.4%) | OR 0.90 (0.71 a 1.13)             | 22 menos por 1000 (de 75 menos a 24 más )           | ⊕⊕⊕○<br>MODERADO | IMPORTANTE  |
| Incidencia de neumonía                                                                                            |                    |                 |                    |                     |                          |                       |                   |                   |                                   |                                                     |                  |             |

| Certainty assessment                                                                                 |                    |                              |                |                     |                    |                       | Nº de pacientes |                | Efecto                               |                                           | Certainty        | Importancia |
|------------------------------------------------------------------------------------------------------|--------------------|------------------------------|----------------|---------------------|--------------------|-----------------------|-----------------|----------------|--------------------------------------|-------------------------------------------|------------------|-------------|
| Nº de estudios                                                                                       | Diseño de estudio  | Riesgo de sesgo <sup>f</sup> | Inconsistencia | Evidencia indirecta | Imprecisión        | Otras consideraciones | Retirada CI     | Mantenimiento  | Relativo (95% CI)                    | Absoluto (95% CI)                         |                  |             |
| 3                                                                                                    | ensayos aleatorios | serio <sup>f</sup>           | no es serio    | no es serio         | serio <sup>c</sup> | ninguno               | 74/2062 (3.6%)  | 83/2057 (4.0%) | OR 0.89<br>(0.64 a 1.22)             | 4 menos por 1000<br>(de 14 menos a 8 más) | ⊕⊕○○<br>BAJA     | IMPORTANTE  |
| Frecuencia exacerbaciones moderadas-ggraves_subgrupos - Eosinófilos basales sangre <2%               |                    |                              |                |                     |                    |                       |                 |                |                                      |                                           |                  |             |
| 2                                                                                                    | ensayos aleatorios | serio <sup>g</sup>           | no es serio    | no es serio         | serio <sup>c</sup> | ninguno               |                 |                | Razón de tasas 1.00<br>(0.82 a 1.21) |                                           | ⊕⊕○○<br>BAJA     | CRÍTICA     |
| Frecuencia exacerbaciones moderadas-graves_subgrupos - Eosinófilos basales sangre >2%                |                    |                              |                |                     |                    |                       |                 |                |                                      |                                           |                  |             |
| 2                                                                                                    | ensayos aleatorios | serio <sup>g</sup>           | no es serio    | no es serio         | serio <sup>c</sup> | ninguno               |                 |                | Razón de tasas 1.22<br>(1.05 a 1.42) |                                           | ⊕⊕○○<br>BAJA     | CRÍTICA     |
| Frecuencia exacerbaciones moderadas-graves_subgrupos - Eosinófilos basales sangre <150/microlitro    |                    |                              |                |                     |                    |                       |                 |                |                                      |                                           |                  |             |
| 2                                                                                                    | ensayos aleatorios | serio <sup>g</sup>           | no es serio    | no es serio         | serio <sup>c</sup> | ninguno               |                 |                | Razón de tasas 1.01<br>(0.80 a 1.26) |                                           | ⊕⊕○○<br>BAJA     | CRÍTICA     |
| Frecuencia exacerbaciones moderadas-graves_subgrupos - Eosinófilos basales sangre 150-299/microlitro |                    |                              |                |                     |                    |                       |                 |                |                                      |                                           |                  |             |
| 2                                                                                                    | ensayos aleatorios | serio <sup>g</sup>           | no es serio    | no es serio         | serio <sup>c</sup> | ninguno               |                 |                | Razón de tasas 1.03<br>(0.85 a 1.26) |                                           | ⊕⊕○○<br>BAJA     | CRÍTICA     |
| Frecuencia exacerbaciones moderadas-graves_subgrupos - Eosinófilos basales sangre <300/microlitro    |                    |                              |                |                     |                    |                       |                 |                |                                      |                                           |                  |             |
| 2                                                                                                    | ensayos aleatorios | serio <sup>g</sup>           | no es serio    | no es serio         | serio <sup>c</sup> | ninguno               |                 |                | Razón de tasas 1.02<br>(0.89 a 1.18) |                                           | ⊕⊕○○<br>BAJA     | CRÍTICA     |
| Frecuencia exacerbaciones moderadas-graves_subgrupos - Eosinófilos basales sangre >300/microlitro    |                    |                              |                |                     |                    |                       |                 |                |                                      |                                           |                  |             |
| 2                                                                                                    | ensayos aleatorios | serio <sup>g</sup>           | no es serio    | no es serio         | no es serio        | ninguno               |                 |                | Razón de tasas 1.63<br>(1.24 a 2.14) |                                           | ⊕⊕⊕○<br>MODERADO | CRÍTICA     |

CI: Intervalo de confianza ; OR: Razón de momios; HR: Razón de riesgos instantáneos; MD: Diferencia media

Explicaciones

- a. Aunque no se detecta heterogeneidad significativa en los estimadores de los diferentes estudios, la frecuencia de exacerbaciones mostró una importante variabilidad dentro de los estudios en relación con la determinación de eosinófilos.
- b. Desescalada a un solo broncodilatador por lo que no representa la práctica clínica habitual. El desenlace no captura correctamente la frecuencia de exacerbaciones, es decir el impacto en aquellos pacientes con varias exacerbaciones al año.
- c. El IC95% no excluye un efecto clínicamente relevante.
- d. Número muy limitado de eventos.
- e. Los efectos absolutos muestran un efecto que probablemente no es clínicamente relevante considerando los dos extremos del IC95%
- f. La duración de los estudios no fue lo suficientemente prolongada para detectar correctamente este desenlace.

g. Resultado de análisis de subgrupos en el que uno de los dos estudios no fue predeterminado (post-hoc). Ninguno de los estudios estratificó la aleatorización según el nivel de eosinófilos.
